# Supplementary material
Source: PubMed Central journal article supplement (PMC2680005)
Supplement: NIHMS86765-supplement-1_si_001.pdf [file NIHMS86765-supplement-1_si_001.pdf]

## Supporting Information for

Tetragonal to Triclinic — A Phase Change for [Fe(TPP)(NO)]

Nathan J. Silvernail, Marilyn M. Olmstead, Bruce C. Noll, and W. Robert Scheidt\*

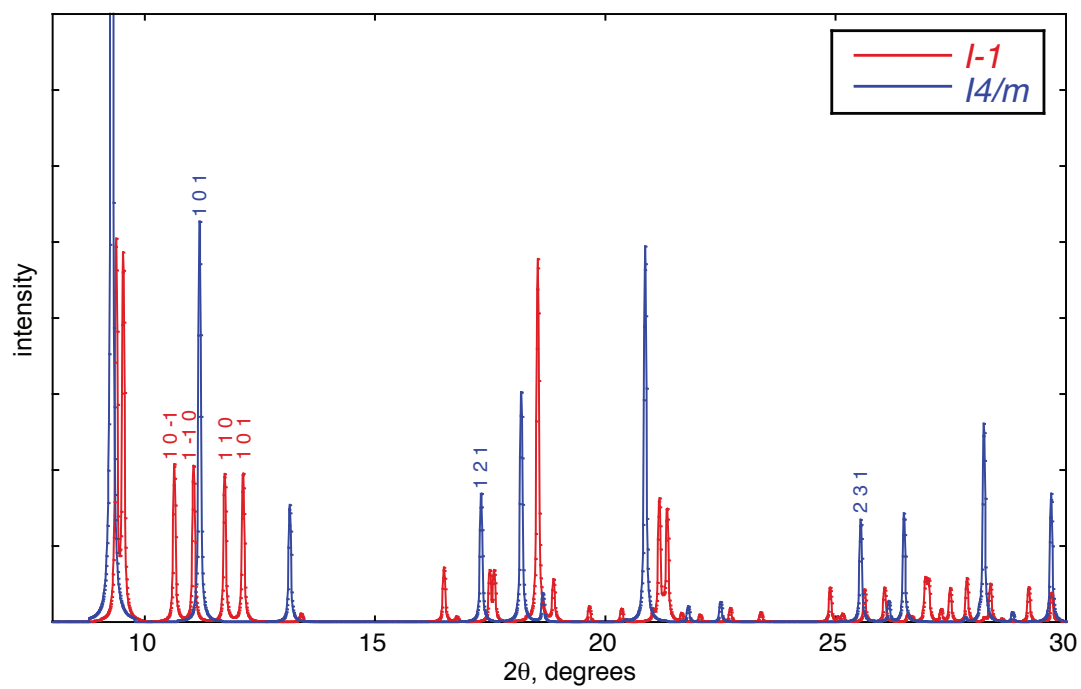

**Figure S1.** Simulated X-ray powder diffraction spectra of [Fe(TPP)(NO)] in the  $I-1$  and  $I4/m$  crystalline phases.

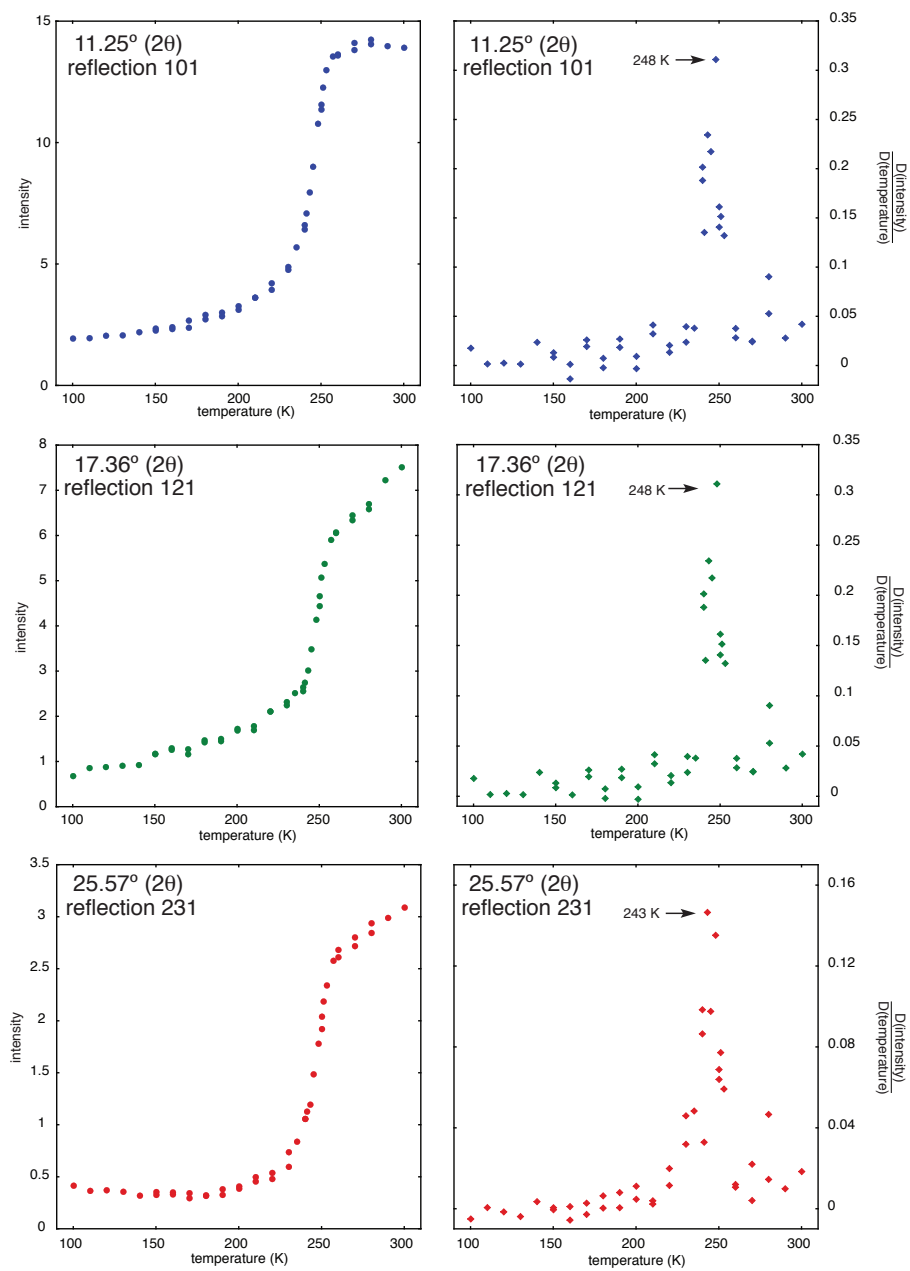

**Figure S2.** X-ray powder diffraction intensity vs. T for the 101, 121, and 231 reflections of  $[\text{Fe}(\text{TPP})(\text{NO})]$  ( $I4/m$ ) are given in the left-hand panels. The right-hand panels show the derivatives of intensity vs. T.

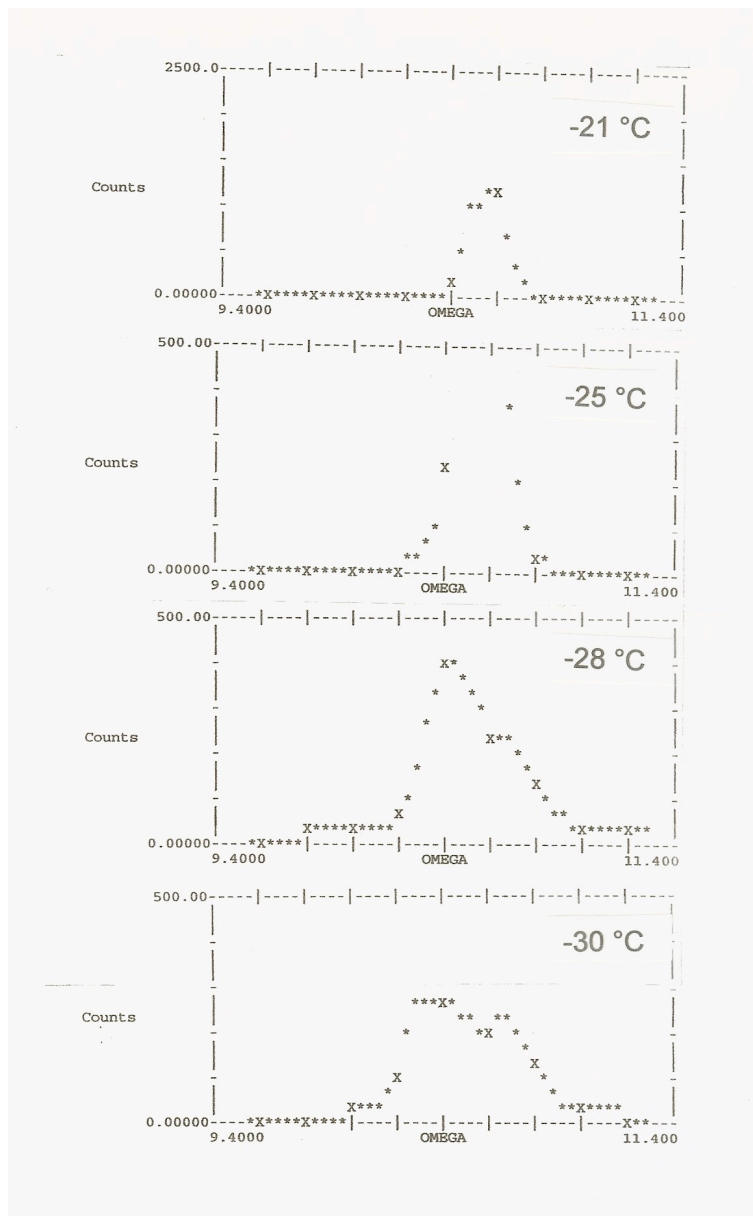

**Figure S3.** Series of  $\omega$ -scans of the (3 1 0) reflection using a serial detector and a single crystal of Fe(TPP)(NO).

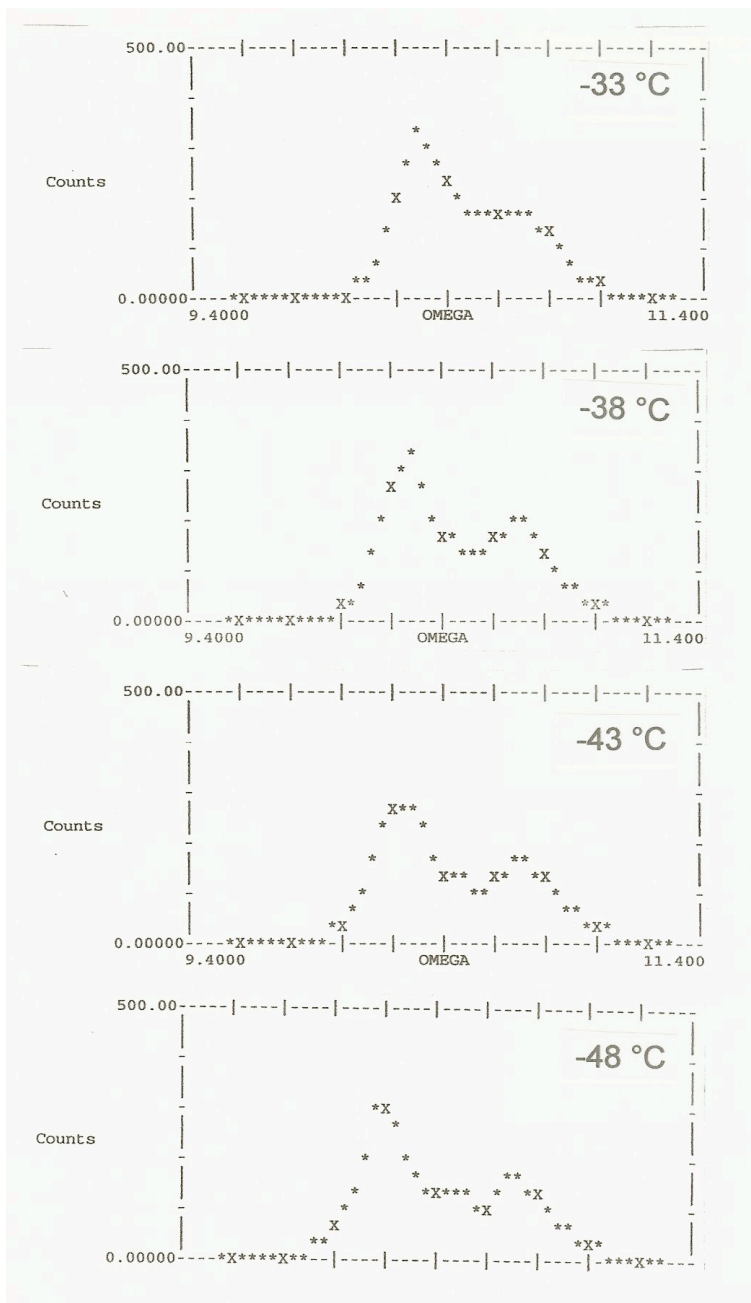

Figure S3. continued.

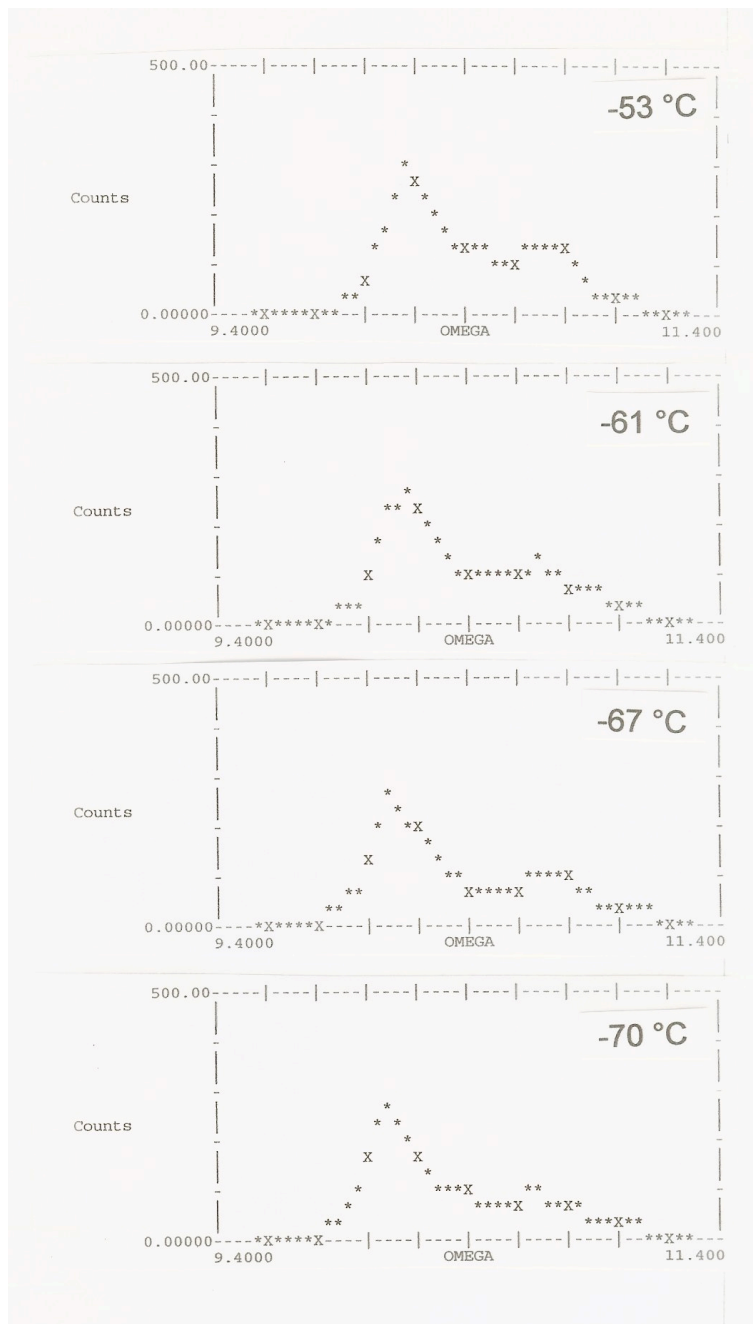

Figure S3. continued.

33 K, crystal 1

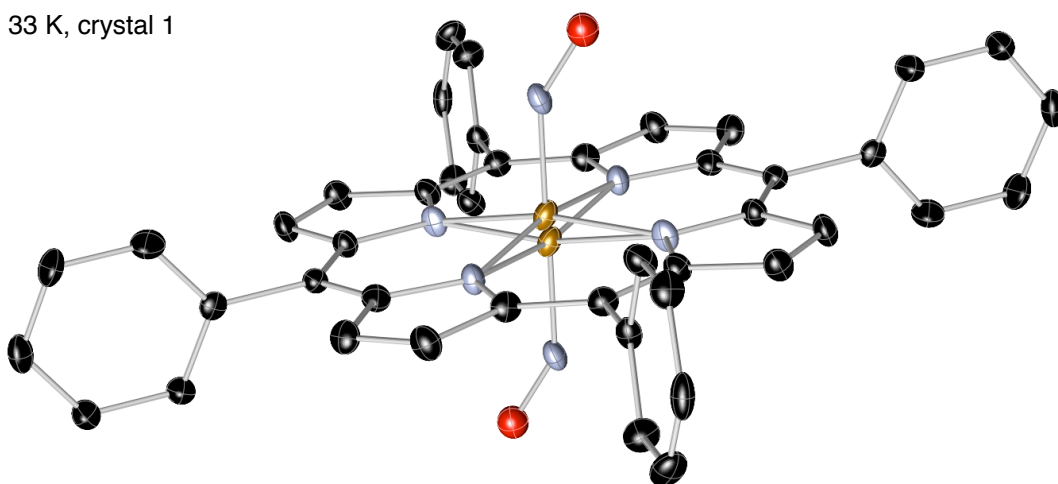

**Figure S4.** ORTEP diagram (50% probability ellipsoids) of [Fe(TPP)(NO)(1-MeIm)] at 33 K. Hydrogen atoms are omitted for clarity.

90 K, crystal 1

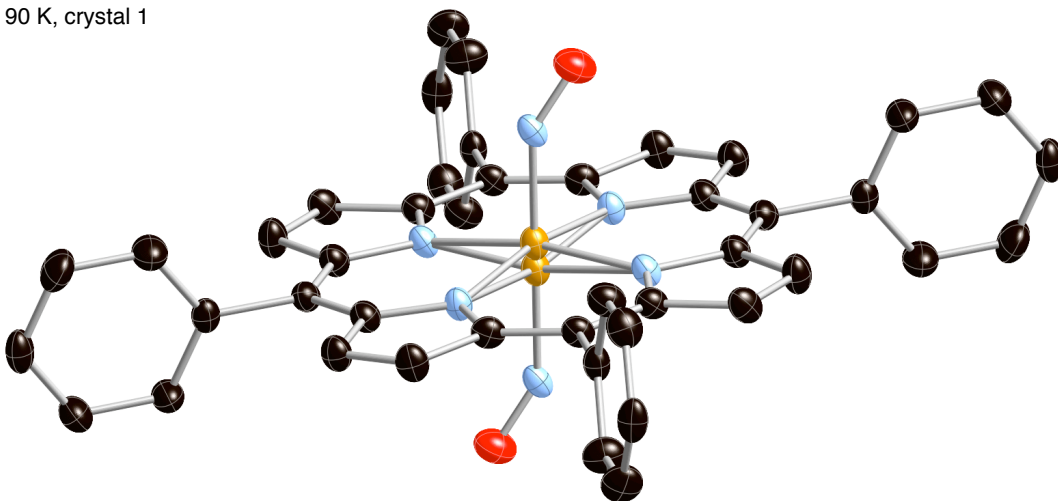

**Figure S5.** ORTEP diagram (50% probability ellipsoids) of [Fe(TPP)(NO)(1-MeIm)] at 90 K. Hydrogen atoms are omitted for clarity.

100 K, crystal 2

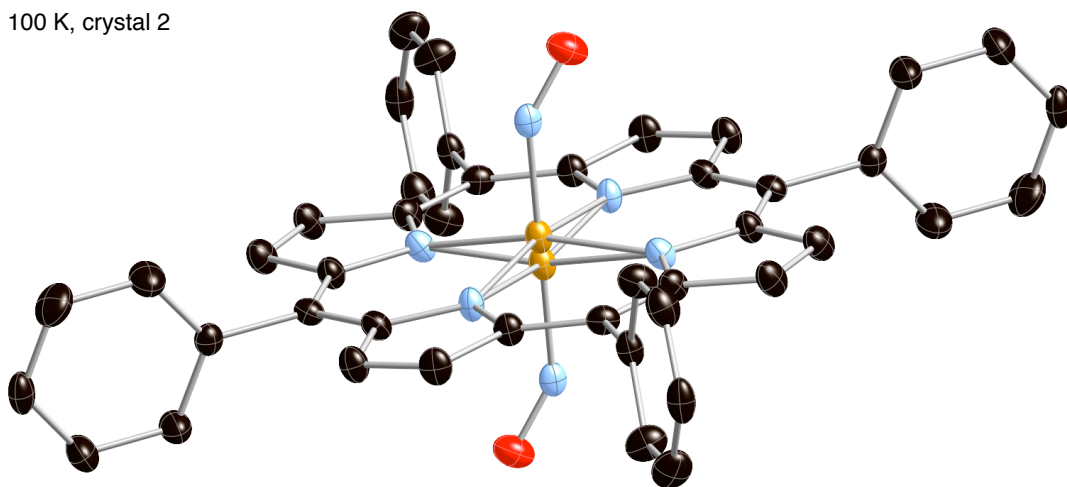

**Figure S6.** ORTEP diagram (50% probability ellipsoids) of [Fe(TPP)(NO)(1-MeIm)] at 100 K. Hydrogen atoms are omitted for clarity.

100 K, crystal 3

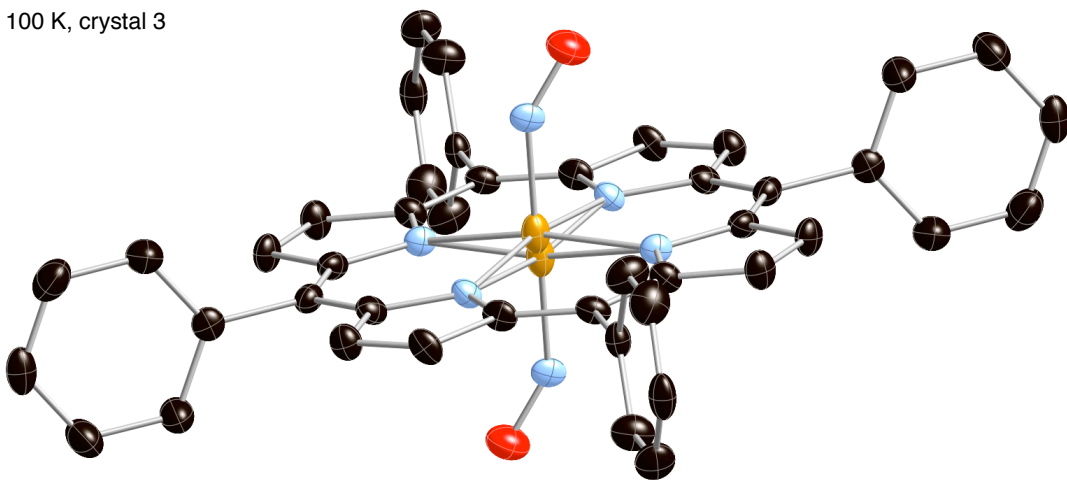

**Figure S7.** ORTEP diagram (50% probability ellipsoids) of [Fe(TPP)(NO)(1-MeIm)] at 100 K. Hydrogen atoms are omitted for clarity.



100 K, crystal 4

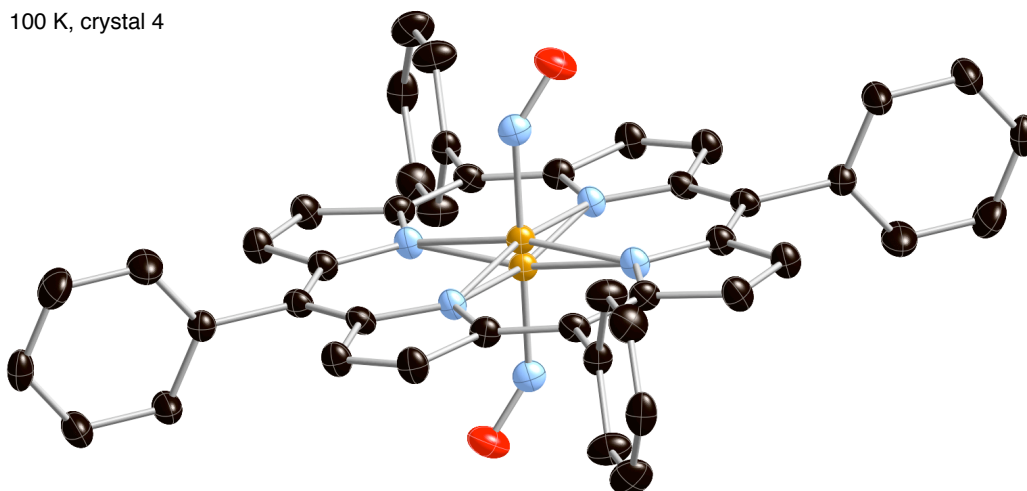

**Figure S8.** ORTEP diagram (50% probability ellipsoids) of [Fe(TPP)(NO)(1-MeIm)] at 100 K. Hydrogen atoms are omitted for clarity.

130 K, crystal 4

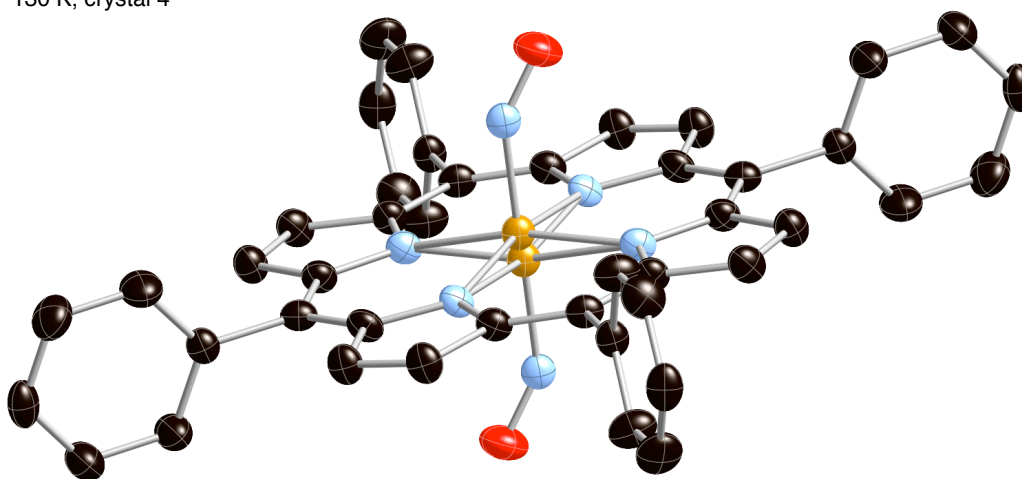

**Figure S9.** ORTEP diagram (50% probability ellipsoids) of [Fe(TPP)(NO)(1-MeIm)] at 130 K. Hydrogen atoms are omitted for clarity.

180 K, crystal 1

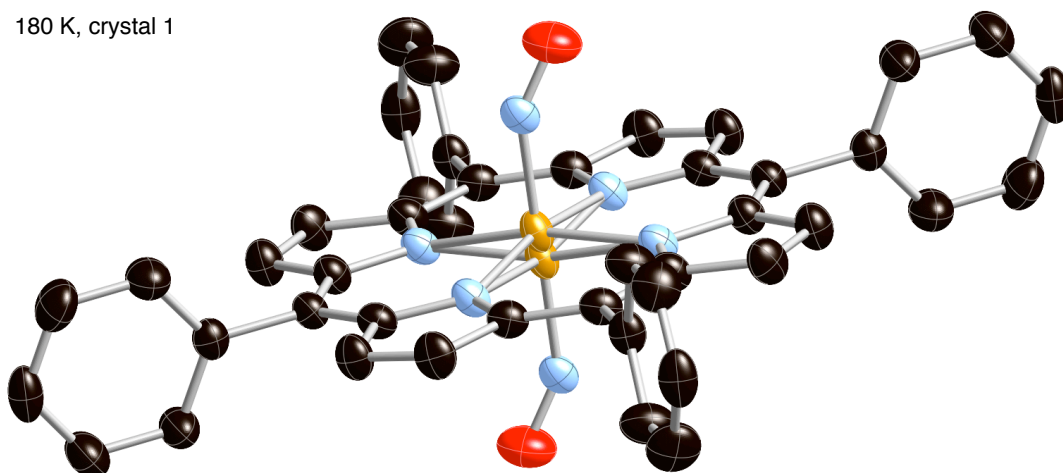

**Figure S10.** ORTEP diagram (50% probability ellipsoids) of [Fe(TPP)(NO)(1-MeIm)] at 180 K. Hydrogen atoms are omitted for clarity.

290 K, crystal 2

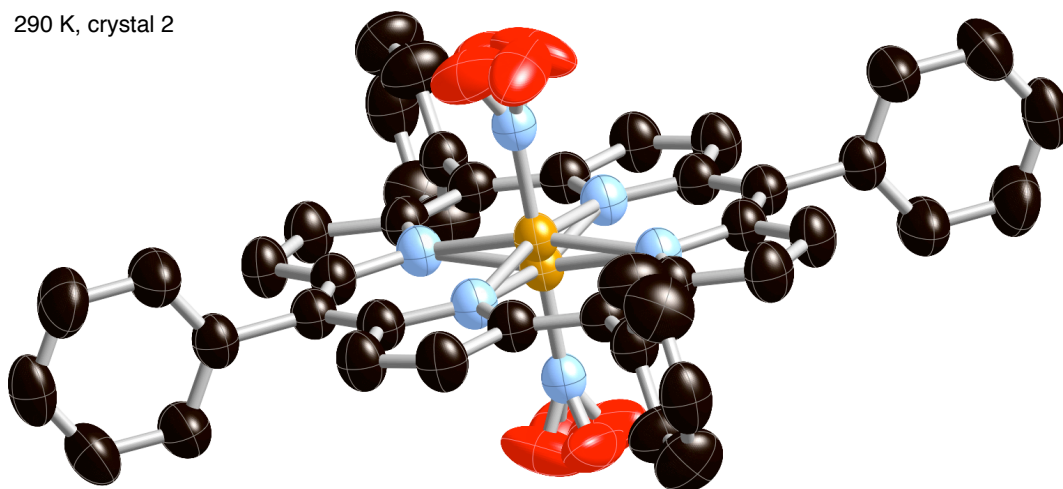

**Figure S11.** ORTEP diagram (50% probability ellipsoids) of [Fe(TPP)(NO)(1-MeIm)] at 290 K. Hydrogen atoms are omitted for clarity.

293 K, crystal 1

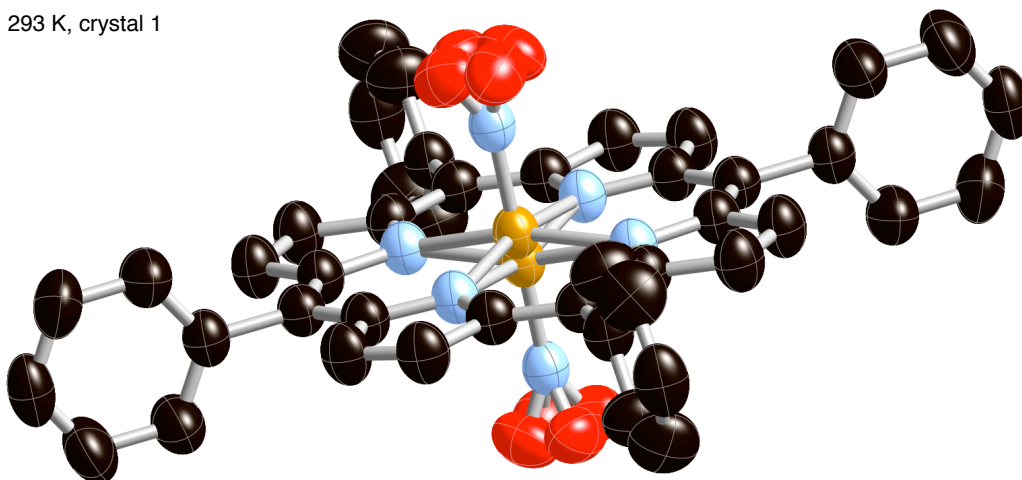

**Figure S12.** ORTEP diagram (50% probability ellipsoids) of [Fe(TPP)(NO)(1-MeIm)] at 293 K. Hydrogen atoms are omitted for clarity.

273 K, crystal 4

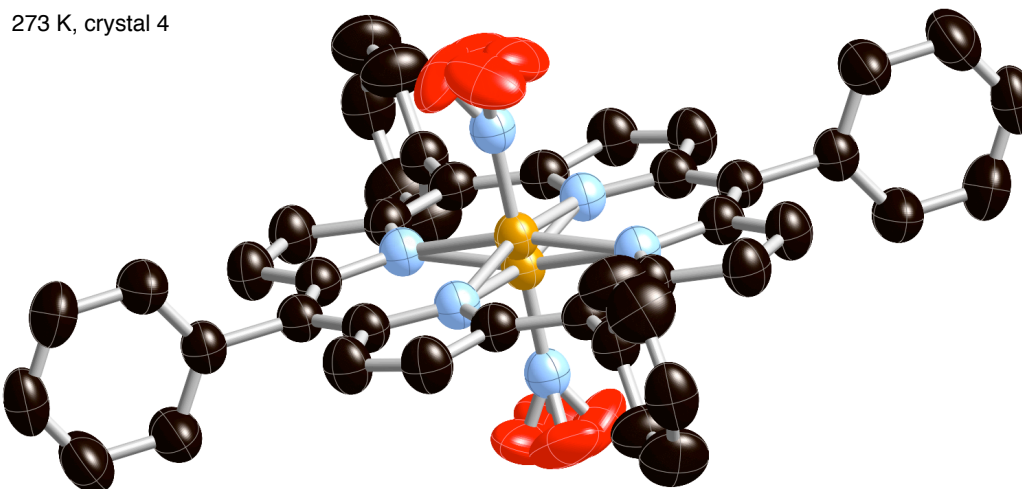

**Figure S13.** ORTEP diagram (50% probability ellipsoids) of [Fe(TPP)(NO)(1-MeIm)] at 273 K. Hydrogen atoms are omitted for clarity.

293 K, crystal 2

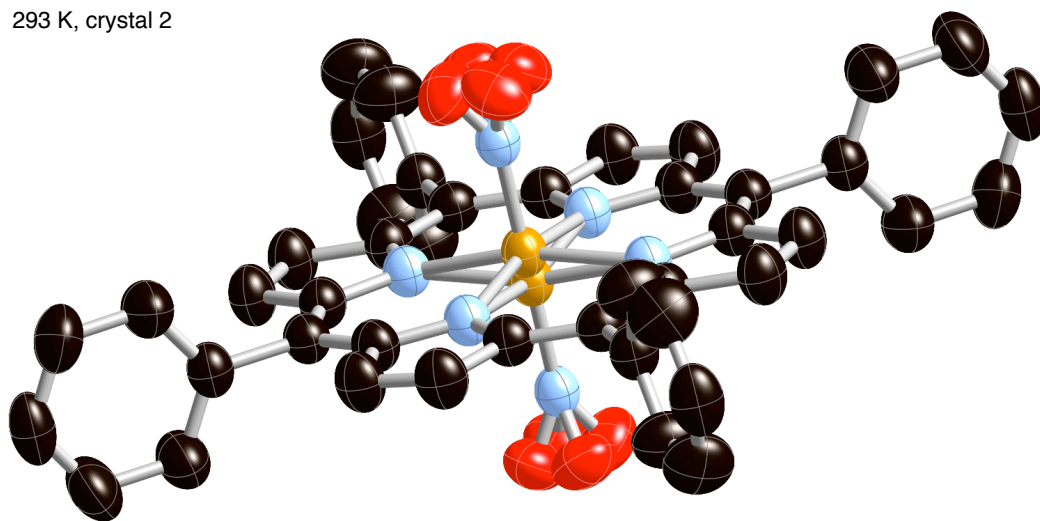

**Figure S14.** ORTEP diagram (50% probability ellipsoids) of [Fe(TPP)(NO)(1-MeIm)] at 293 K. Hydrogen atoms are omitted for clarity.

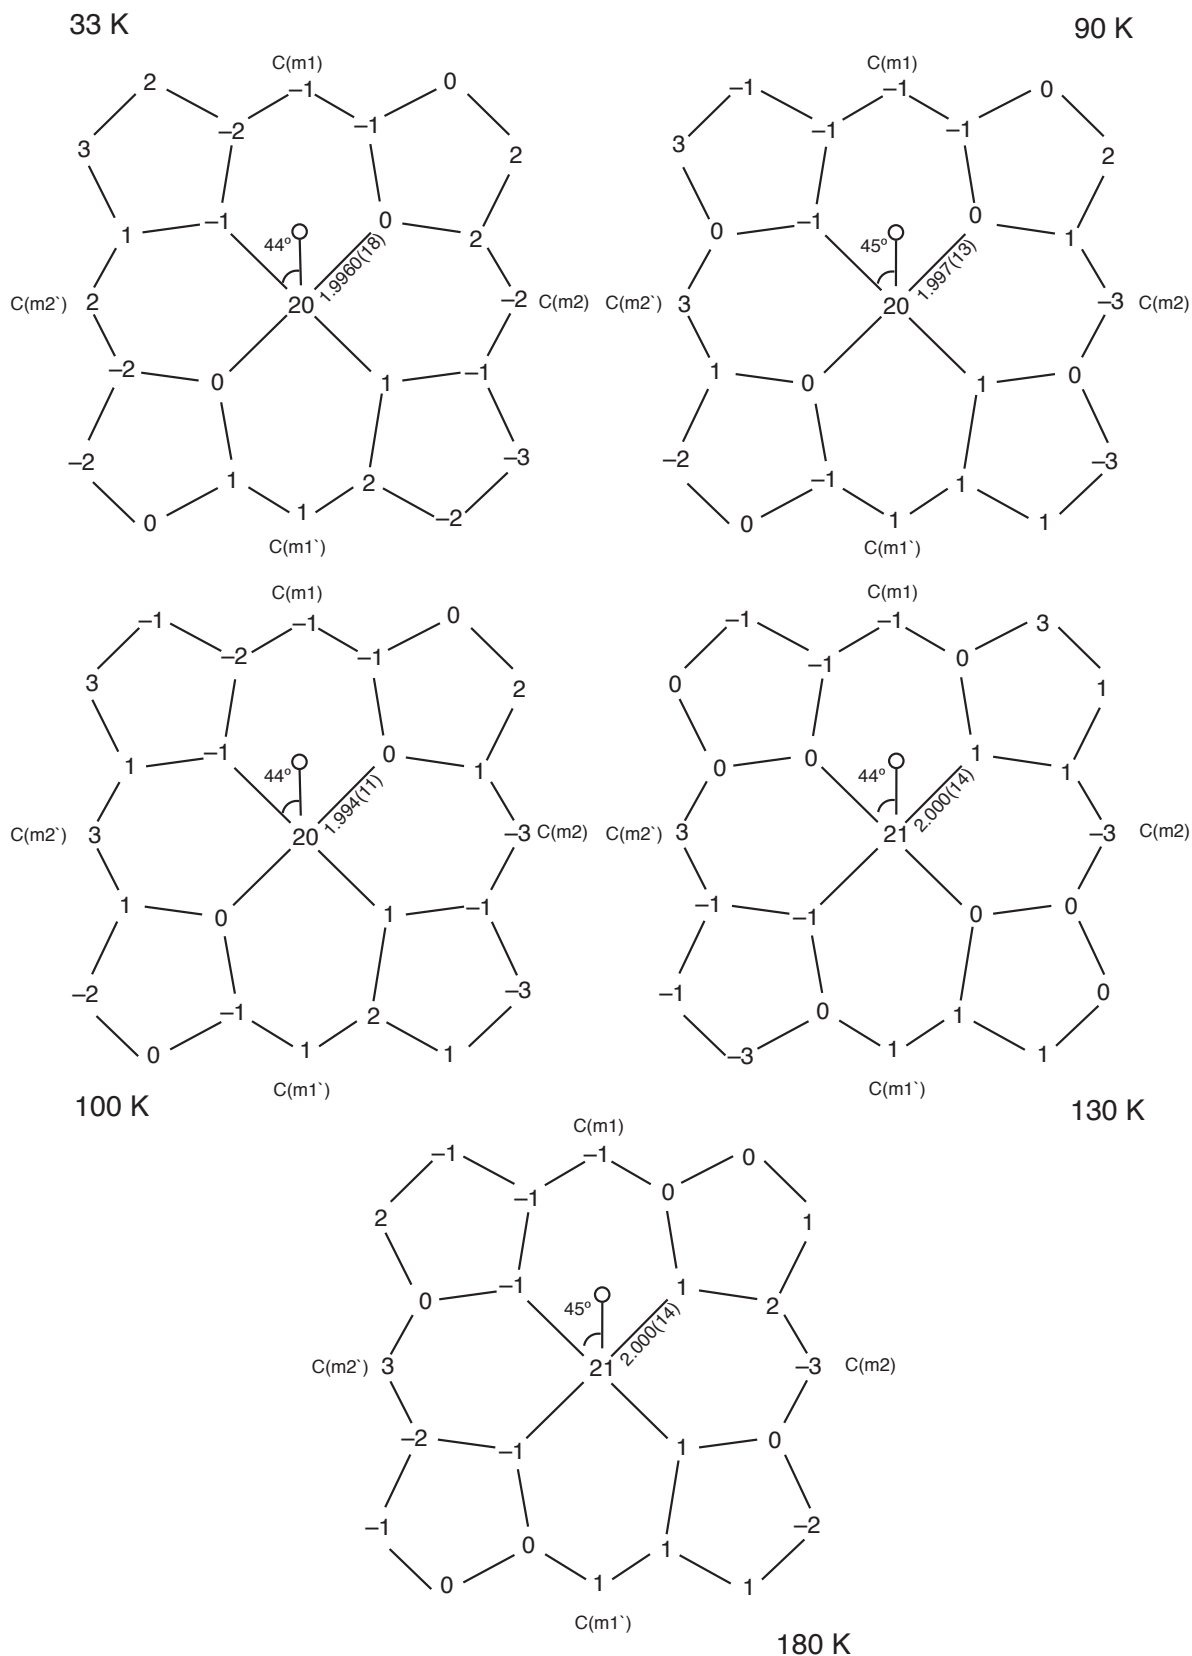

**Figure S15.** Formal diagram of the porphyrinato cores of  $[\text{Fe}(\text{TPP})(\text{NO})]$  at 33, 90, 100, 130, and 180 K displaying the perpendicular displacements (in units of  $0.01 \text{ \AA}$ ) of the core atoms from the 24-atom mean plane. Positive displacements are toward the nitrosyl-coordinated face. The location of the nitrosyl oxygen atom projection onto the porphyrin core is indicated by the small circle.

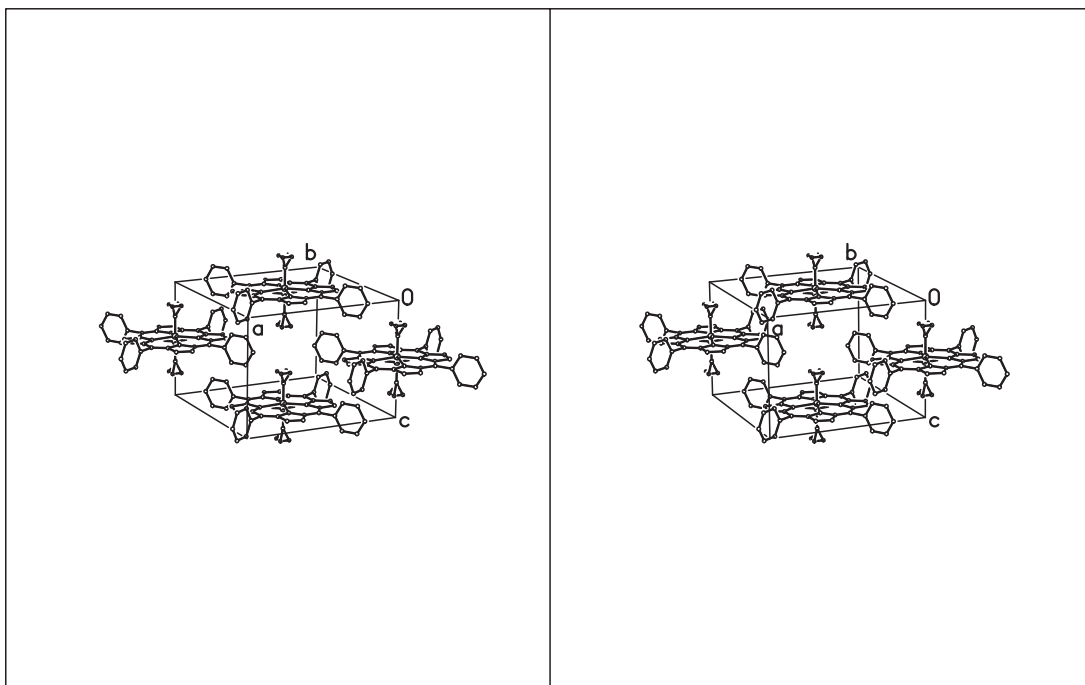

Tetragonal  $I4/m$

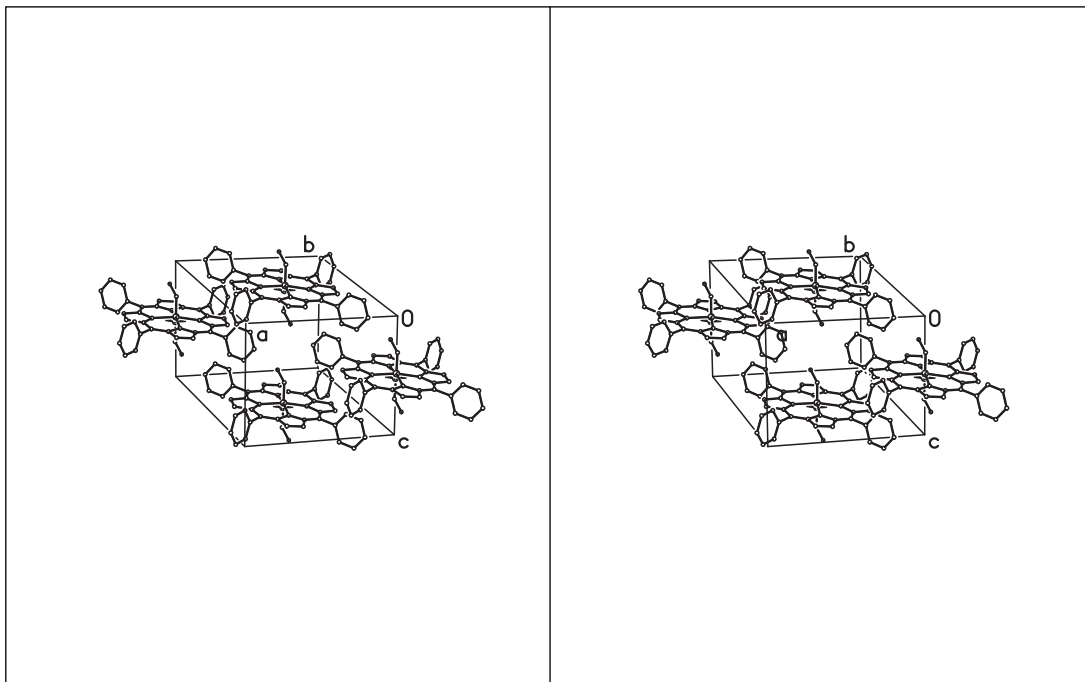

Triclinic  $I-1$

Figure S16. Stereo diagrams of the two I-centered cells (3 pages).

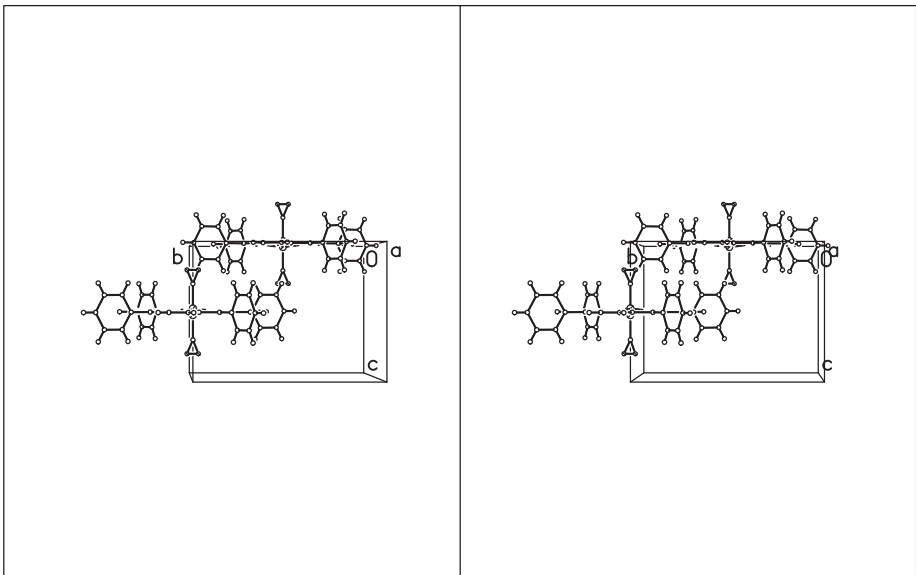

view down a

**Tetragonal**

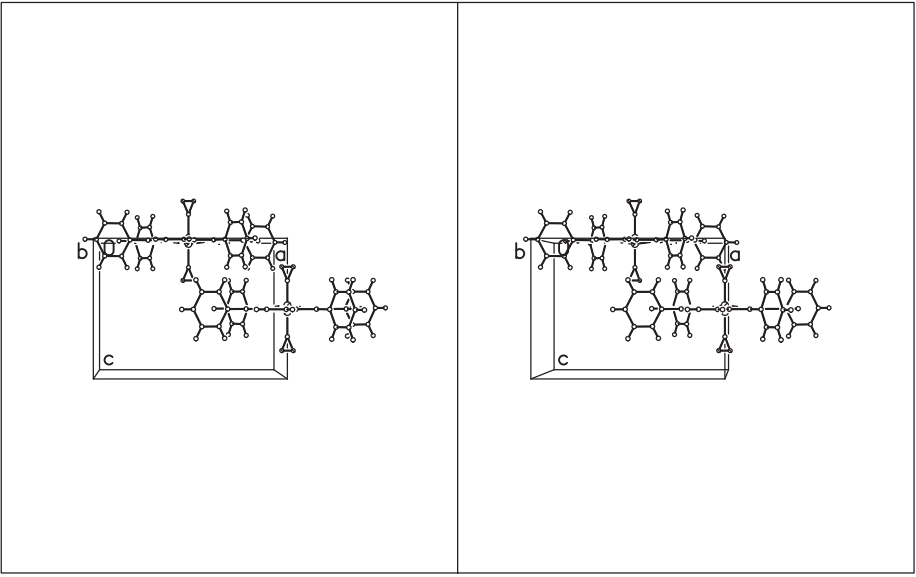

view down b

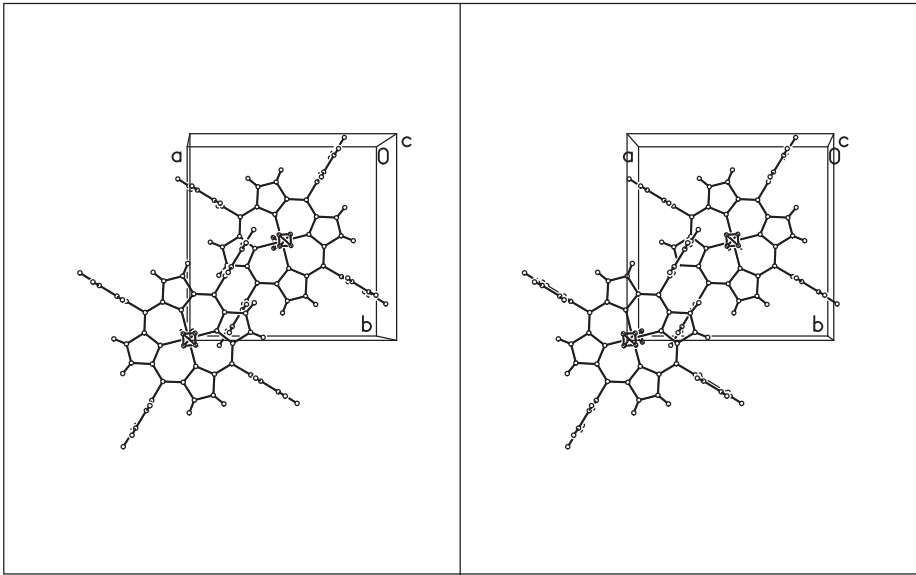

view down c

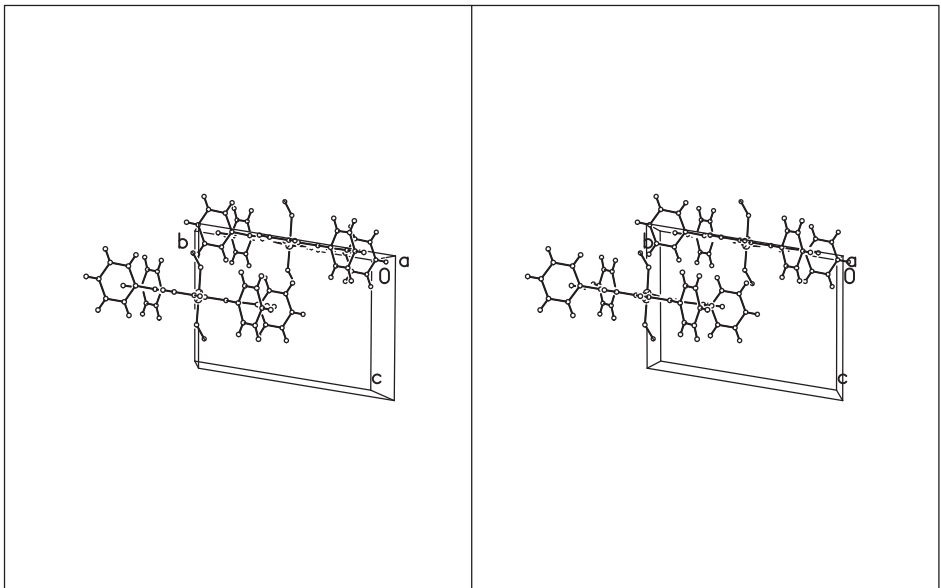

view down a

**Triclinic I**

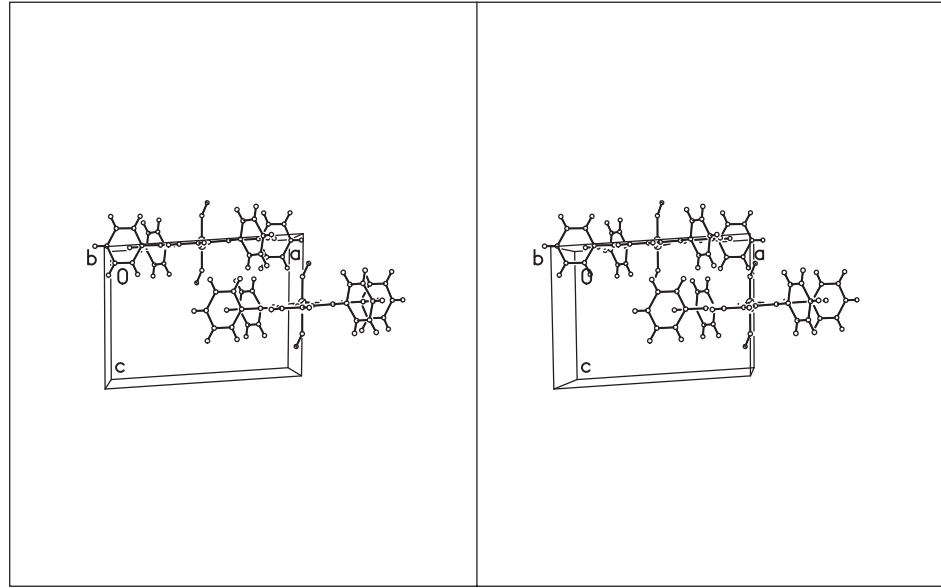

view down b

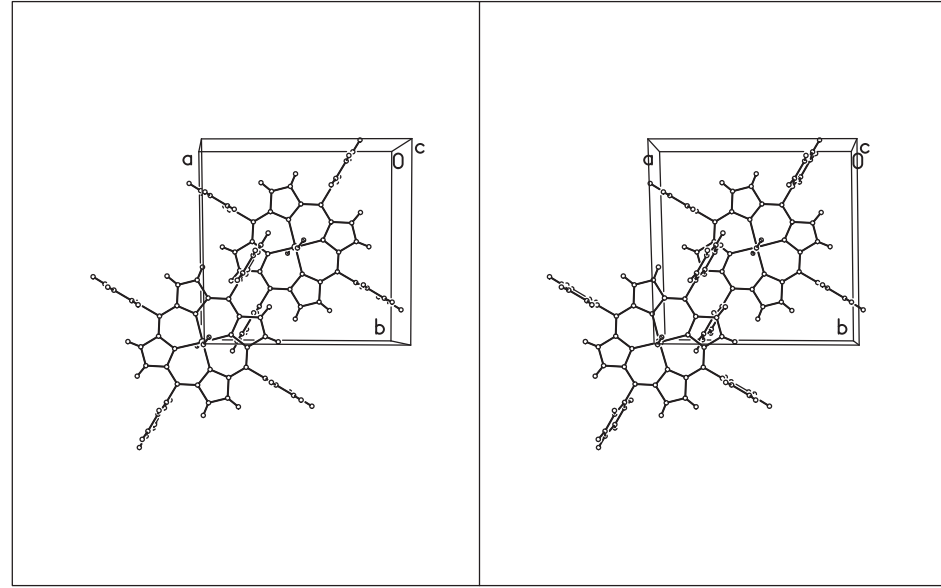

view down c



## Supporting Information

**Table S1.** Complete Crystallographic Details for [Fe(TPP)(NO)] at 33 K, crystal 1

|                                           |                                                  |
|-------------------------------------------|--------------------------------------------------|
| formula                                   | $C_{44}H_{28}FeN_5O$                             |
| FW, amu                                   | 698.56                                           |
| $a$ , Å                                   | 9.745(2)                                         |
| $b$ , Å                                   | 9.867(2)                                         |
| $c$ , Å                                   | 10.375(3)                                        |
| $\alpha$ , deg                            | 82.66(2)                                         |
| $\beta$ , deg                             | 66.010(2)                                        |
| $\gamma$ , deg                            | 70.05(2)                                         |
| $V$ , Å <sup>3</sup>                      | 856.7(4)                                         |
| space group                               | $P\bar{1}$                                       |
| $Z$                                       | 1                                                |
| $D_c$ , g/cm <sup>3</sup>                 | 1.354                                            |
| F(000)                                    | 361                                              |
| $\mu$ , mm <sup>-1</sup>                  | 0.484                                            |
| crystal dimensions, mm                    | 0.21 × 0.17 × 0.08                               |
| radiation                                 | MoK $\alpha$ , $\bar{\lambda} = 0.71073$ Å       |
| temperature, K                            | 33(2)                                            |
| diffractometer                            | Bruker SMART Apex II                             |
| $\theta$ range for collected data, deg    | 3.05–27.50                                       |
| index range                               | –11 ≤ $h$ ≤ 12<br>–12 ≤ $k$ ≤ 12<br>0 ≤ $l$ ≤ 13 |
| total data collected                      | 4221                                             |
| absorption correction                     | Semi-empirical fromequiv                         |
| relative transmission coefficients (I)    | 0.9623 and 0.9052                                |
| unique data                               | 4221 ( $R_{\text{int}} = 0.0806$ )               |
| unique observed data [ $I > 2\sigma(I)$ ] | 2476                                             |
| refinement method                         | Full-matrix least-squares on $F^2$               |
| data/restraints/parameters                | 4221/0/247                                       |
| goodness-of-fit (pased on $F^2$ )         | 0.827                                            |
| final $R$ indices [ $I > 2\sigma(I)$ ]    | $R_1 = 0.0486$ , $wR_2 = 0.0806$                 |
| final $R$ indices (all data)              | $R_1 = 0.0940$ , $wR_2 = 0.0884$                 |

**Table S2.** Atomic Coordinates and Equivalent Isotropic Displacement Parameters ( $\text{\AA}^2$ ) for [Fe(TPP)(NO)] at 33 K, crystal 1<sup>a</sup>

| atom  | <i>x</i>   | <i>y</i>  | <i>z</i>    | <i>U</i> (eq) |
|-------|------------|-----------|-------------|---------------|
| Fe(1) | 0.4811(7)  | 0.4971(9) | 0.4985(9)   | 0.0146(7)     |
| N(1)  | 0.4642(2)  | 0.6814(2) | 0.3923(2)   | 0.0147(5)     |
| N(2)  | 0.3571(3)  | 0.6095(2) | 0.67951(19) | 0.0153(5)     |
| C(m1) | 0.6313(3)  | 0.5875(3) | 0.1493(2)   | 0.0152(6)     |
| C(m2) | 0.2814(3)  | 0.8561(3) | 0.5877(2)   | 0.0134(6)     |
| C(a1) | 0.5281(3)  | 0.6986(3) | 0.2469(2)   | 0.0155(6)     |
| C(a2) | 0.3689(3)  | 0.8190(3) | 0.4448(3)   | 0.0157(6)     |
| C(a3) | 0.2790(3)  | 0.7565(3) | 0.6961(2)   | 0.0145(6)     |
| C(a4) | 0.3166(3)  | 0.5565(3) | 0.8149(2)   | 0.0153(6)     |
| C(b1) | 0.4726(3)  | 0.8464(3) | 0.2107(3)   | 0.0190(6)     |
| C(b2) | 0.3742(3)  | 0.9206(3) | 0.3330(2)   | 0.0176(6)     |
| C(b3) | 0.1910(3)  | 0.7945(3) | 0.8430(2)   | 0.0177(6)     |
| C(b4) | 0.2145(3)  | 0.6707(3) | 0.9159(2)   | 0.0183(6)     |
| C(10) | 0.6924(3)  | 0.6269(2) | -0.0040(2)  | 0.0138(6)     |
| C(11) | 0.8411(3)  | 0.6458(3) | -0.0682(3)  | 0.0193(7)     |
| C(12) | 0.8985(3)  | 0.6816(3) | -0.2106(3)  | 0.0196(7)     |
| C(13) | 0.8081(3)  | 0.6981(2) | -0.2892(2)  | 0.0195(7)     |
| C(14) | 0.6593(3)  | 0.6821(3) | -0.2252(3)  | 0.0227(7)     |
| C(15) | 0.6017(3)  | 0.6468(3) | -0.0829(3)  | 0.0203(7)     |
| C(20) | 0.1827(3)  | 1.0105(3) | 0.6267(2)   | 0.0133(6)     |
| C(21) | 0.0223(3)  | 1.0567(3) | 0.6517(3)   | 0.0217(7)     |
| C(22) | -0.0695(3) | 1.1995(3) | 0.6876(3)   | 0.0231(7)     |
| C(23) | -0.0021(3) | 1.2979(3) | 0.6993(2)   | 0.0205(7)     |
| C(24) | 0.1566(3)  | 1.2531(3) | 0.6756(3)   | 0.0273(7)     |
| C(25) | 0.2482(3)  | 1.1104(3) | 0.6389(3)   | 0.0253(7)     |
| N(3)  | 0.3092(5)  | 0.4894(4) | 0.4901(4)   | 0.0166(10)    |
| O(1)  | 0.1804(4)  | 0.5563(4) | 0.5027(4)   | 0.0214(9)     |

<sup>a</sup>*U*(eq) is defined as one third of the trace of the orthogonalized  $\mathbf{U}_{ij}$  tensor. The estimated standard deviations of the least significant digits are given in parentheses.

**Table S3.** Bond Lengths for [Fe(TPP)(NO)] at 33 K, crystal 1<sup>a</sup>

| bond          | length (Å) | bond         | length (Å) |
|---------------|------------|--------------|------------|
| Fe(1)–Fe(1)#1 | 0.405(7)   | C(b3)–H(b3)  | 0.9500     |
| Fe(1)–N(3)    | 1.739(6)   | C(b4)–H(b4)  | 0.9500     |
| Fe(1)–N(1)    | 1.995(9)   | C(10)–C(15)  | 1.385(4)   |
| Fe(1)–N(2)    | 1.997(9)   | C(10)–C(11)  | 1.394(3)   |
| Fe(1)–N(2)#1  | 2.000(9)   | C(11)–C(12)  | 1.397(3)   |
| Fe(1)–N(1)#1  | 2.004(9)   | C(11)–H(11)  | 0.9500     |
| Fe(1)–N(3)#1  | 2.143(5)   | C(12)–C(13)  | 1.385(4)   |
| N(1)–C(a2)    | 1.385(3)   | C(12)–H(12)  | 0.9500     |
| N(1)–C(a1)    | 1.391(3)   | C(13)–C(14)  | 1.384(4)   |
| N(1)–Fe(1)#1  | 2.003(9)   | C(13)–H(13)  | 0.9500     |
| N(2)–C(a4)    | 1.380(3)   | C(14)–C(15)  | 1.394(3)   |
| N(2)–C(a3)    | 1.385(3)   | C(14)–H(14)  | 0.9500     |
| N(2)–Fe(1)#1  | 2.000(9)   | C(15)–H(15)  | 0.9500     |
| C(m1)–C(a1)   | 1.393(3)   | C(20)–C(25)  | 1.386(4)   |
| C(m1)–C(a4#1) | 1.393(3)   | C(20)–C(21)  | 1.391(4)   |
| C(m1)–C(10)   | 1.505(3)   | C(21)–C(22)  | 1.388(3)   |
| C(m2)–C(a3)   | 1.394(3)   | C(21)–H(21)  | 0.9500     |
| C(m2)–C(a2)   | 1.400(3)   | C(22)–C(23)  | 1.385(4)   |
| C(m2)–C(20)   | 1.500(3)   | C(22)–H(22)  | 0.9500     |
| C(a1)–C(b1)   | 1.431(3)   | C(23)–C(24)  | 1.378(4)   |
| C(a2)–C(b2)   | 1.429(3)   | C(23)–H(23)  | 0.9500     |
| C(a3)–C(b3)   | 1.436(3)   | C(24)–C(25)  | 1.388(3)   |
| C(a4)–C(m1#1) | 1.393(3)   | C(24)–H(24)  | 0.9500     |
| C(a4)–C(b4)   | 1.430(3)   | C(25)–H(25)  | 0.9500     |
| C(b1)–C(b2)   | 1.355(3)   | N(3)–O(1)    | 1.163(5)   |
| C(b1)–H(b1)   | 0.9500     | N(3)–Fe(1)#1 | 2.143(5)   |
| C(b2)–H(b2)   | 0.9500     |              |            |
| C(b3)–C(b4)   | 1.353(3)   |              |            |

<sup>a</sup>The estimated standard deviations of the least significant digits are given in parentheses.

**Table S4.** Bond Angles for [Fe(TPP)(NO)] at 33 K, crystal 1<sup>a</sup>

| angle                | degree   | angle             | degree   |
|----------------------|----------|-------------------|----------|
| Fe(1)#1–Fe(1)–N(3)   | 175(3)   | C(b2)–C(b1)–H(b1) | 126.5    |
| Fe(1)#1–Fe(1)–N(1)   | 85(3)    | C(a1)–C(b1)–H(b1) | 126.5    |
| N(3)–Fe(1)–N(1)      | 90.9(4)  | C(b1)–C(b2)–C(a2) | 107.1(2) |
| Fe(1)#1–Fe(1)–N(2)   | 85(2)    | C(b1)–C(b2)–H(b2) | 126.5    |
| N(3)–Fe(1)–N(2)      | 91.5(3)  | C(a2)–C(b2)–H(b2) | 126.5    |
| N(1)–Fe(1)–N(2)      | 89.6(4)  | C(b4)–C(b3)–C(a3) | 106.8(2) |
| Fe(1)#1–Fe(1)–N(2)#1 | 84(2)    | C(b4)–C(b3)–H(b3) | 126.6    |
| N(3)–Fe(1)–N(2)#1    | 100.1(4) | C(a3)–C(b3)–H(b3) | 126.6    |
| N(1)–Fe(1)–N(2)#1    | 89.5(4)  | C(b3)–C(b4)–C(a4) | 107.2(2) |
| N(2)–Fe(1)–N(2)#1    | 168.4(2) | C(b3)–C(b4)–H(b4) | 126.4    |
| Fe(1)#1–Fe(1)–N(1)#1 | 83(3)    | C(a4)–C(b4)–H(b4) | 126.4    |
| N(3)–Fe(1)–N(1)#1    | 100.7(4) | C(15)–C(10)–C(11) | 119.0(2) |
| N(1)–Fe(1)–N(1)#1    | 168.4(2) | C(15)–C(10)–C(m1) | 120.8(2) |
| N(2)–Fe(1)–N(1)#1    | 89.3(4)  | C(11)–C(10)–C(m1) | 120.2(2) |
| N(2)#1–Fe(1)–N(1)#1  | 89.3(3)  | C(10)–C(11)–C(12) | 120.4(3) |
| Fe(1)#1–Fe(1)–N(3)#1 | 4(2)     | C(10)–C(11)–H(11) | 119.8    |
| N(3)–Fe(1)–N(3)#1    | 179.0(5) | C(12)–C(11)–H(11) | 119.8    |
| N(1)–Fe(1)–N(3)#1    | 88.4(3)  | C(13)–C(12)–C(11) | 120.1(3) |
| N(2)–Fe(1)–N(3)#1    | 87.7(3)  | C(13)–C(12)–H(12) | 119.9    |
| N(2)#1–Fe(1)–N(3)#1  | 80.7(3)  | C(11)–C(12)–H(12) | 119.9    |
| N(1)#1–Fe(1)–N(3)#1  | 80.0(3)  | C(14)–C(13)–C(12) | 119.7(2) |
| C(a2)–N(1)–C(a1)     | 104.3(2) | C(14)–C(13)–H(13) | 120.2    |
| C(a2)–N(1)–Fe(1)     | 127.6(3) | C(12)–C(13)–H(13) | 120.2    |
| C(a1)–N(1)–Fe(1)     | 127.6(3) | C(13)–C(14)–C(15) | 120.2(3) |
| C(a2)–N(1)–Fe(1)#1   | 127.8(3) | C(13)–C(14)–H(14) | 119.9    |
| C(a1)–N(1)–Fe(1)#1   | 127.5(3) | C(15)–C(14)–H(14) | 119.9    |
| C(a4)–N(2)–C(a3)     | 104.8(2) | C(10)–C(15)–C(14) | 120.6(3) |
| C(a4)–N(2)–Fe(1)     | 127.7(3) | C(10)–C(15)–H(15) | 119.7    |
| C(a3)–N(2)–Fe(1)     | 127.2(3) | C(14)–C(15)–H(15) | 119.7    |
| C(a4)–N(2)–Fe(1)#1   | 127.4(3) | C(25)–C(20)–C(21) | 118.3(2) |
| C(a3)–N(2)–Fe(1)#1   | 127.2(3) | C(25)–C(20)–C(m2) | 121.3(2) |
| C(a1)–C(m1)–C(a4)#1  | 124.2(2) | C(21)–C(20)–C(m2) | 120.4(2) |
| C(a1)–C(m1)–C(10)    | 117.6(2) | C(22)–C(21)–C(20) | 120.6(3) |
| C(a4)#1–C(m1)–C(10)  | 118.2(2) | C(22)–C(21)–H(21) | 119.7    |

**Table S4.** Continued

| angle               | degree     | angle             | degree   |
|---------------------|------------|-------------------|----------|
| C(a3)–C(m2)–C(a2)   | 123.4(2)   | C(20)–C(21)–H(21) | 119.7    |
| C(a3)–C(m2)–C(20)   | 118.1(2)   | C(23)–C(22)–C(21) | 120.3(3) |
| C(a2)–C(m2)–C(20)   | 118.5(2)   | C(23)–C(22)–H(22) | 119.9    |
| N(1)–C(a1)–C(m1)    | 124.9(2)   | C(21)–C(22)–H(22) | 119.9    |
| N(1)–C(a1)–C(b1)    | 110.7(2)   | C(24)–C(23)–C(22) | 119.6(2) |
| C(m1)–C(a1)–C(b1)   | 124.4(2)   | C(24)–C(23)–H(23) | 120.2    |
| N(1)–C(a2)–C(m2)    | 125.3(2)   | C(22)–C(23)–H(23) | 120.2    |
| N(1)–C(a2)–C(b2)    | 110.9(2)   | C(23)–C(24)–C(25) | 120.0(3) |
| C(m2)–C(a2)–C(b2)   | 123.8(2)   | C(23)–C(24)–H(24) | 120.0    |
| N(2)–C(a3)–C(m2)    | 126.0(2)   | C(25)–C(24)–H(24) | 120.0    |
| N(2)–C(a3)–C(b3)    | 110.50(19) | C(20)–C(25)–C(24) | 121.2(3) |
| C(m2)–C(a3)–C(b3)   | 123.5(2)   | C(20)–C(25)–H(25) | 119.4    |
| N(2)–C(a4)–C(m1#1)  | 125.4(2)   | C(24)–C(25)–H(25) | 119.4    |
| N(2)–C(a4)–C(b4)    | 110.7(2)   | O(1)–N(3)–Fe(1)   | 144.4(5) |
| C(m1#1)–C(a4)–C(b4) | 123.9(2)   | O(1)–N(3)–Fe(1)#1 | 143.3(4) |
| C(b2)–C(b1)–C(a1)   | 107.0(2)   |                   |          |

<sup>a</sup>The estimated standard deviations of the least significant digits are given in parentheses.

**Table S5.** Anisotropic Displacement Parameters ( $\text{\AA}^2$ ) for  $[\text{Fe}(\text{TPP})(\text{NO})]$  at 33 K, crystal 1<sup>a</sup>

| atom  | $U_{11}$   | $U_{22}$   | $U_{33}$   | $U_{23}$    | $U_{13}$    | $U_{12}$    |
|-------|------------|------------|------------|-------------|-------------|-------------|
| Fe(1) | 0.022(2)   | 0.0127(6)  | 0.0105(4)  | 0.0003(4)   | -0.0061(16) | -0.0070(15) |
| N(1)  | 0.0170(13) | 0.0109(12) | 0.0127(11) | 0.0000(9)   | -0.0044(10) | -0.0017(10) |
| N(2)  | 0.0175(13) | 0.0124(12) | 0.0116(11) | 0.0043(9)   | -0.0053(10) | -0.0013(10) |
| C(m1) | 0.0166(15) | 0.0172(14) | 0.0118(13) | 0.0030(10)  | -0.0056(12) | -0.0062(12) |
| C(m2) | 0.0126(14) | 0.0131(14) | 0.0147(13) | 0.0000(10)  | -0.0058(12) | -0.0036(11) |
| C(a1) | 0.0159(15) | 0.0176(15) | 0.0103(13) | 0.0023(11)  | -0.0031(12) | -0.0053(12) |
| C(a2) | 0.0123(14) | 0.0169(14) | 0.0174(13) | -0.0005(11) | -0.0044(12) | -0.0052(12) |
| C(a3) | 0.0159(15) | 0.0126(14) | 0.0136(13) | 0.0010(11)  | -0.0066(12) | -0.0020(12) |
| C(a4) | 0.0133(15) | 0.0165(14) | 0.0135(13) | 0.0009(10)  | -0.0038(12) | -0.0038(12) |
| C(b1) | 0.0189(16) | 0.0170(15) | 0.0173(14) | 0.0043(11)  | -0.0066(13) | -0.0032(12) |
| C(b2) | 0.0213(16) | 0.0119(14) | 0.0185(14) | 0.0038(11)  | -0.0070(13) | -0.0065(12) |
| C(b3) | 0.0165(15) | 0.0139(14) | 0.0173(14) | -0.0024(11) | -0.0055(12) | 0.0012(12)  |
| C(b4) | 0.0199(16) | 0.0191(15) | 0.0124(13) | 0.0003(11)  | -0.0064(12) | -0.0021(13) |
| C(10) | 0.0173(15) | 0.0115(13) | 0.0087(12) | 0.0021(10)  | -0.0048(12) | -0.0011(12) |
| C(11) | 0.0180(15) | 0.0200(15) | 0.0169(14) | 0.0004(11)  | -0.0071(12) | -0.0020(12) |
| C(12) | 0.0193(16) | 0.0203(16) | 0.0155(14) | 0.0003(12)  | -0.0027(13) | -0.0069(12) |
| C(13) | 0.0299(17) | 0.0090(13) | 0.0108(13) | 0.0001(10)  | -0.0011(13) | -0.0041(12) |
| C(14) | 0.0363(18) | 0.0208(16) | 0.0179(15) | 0.0038(12)  | -0.0180(14) | -0.0096(14) |
| C(15) | 0.0227(16) | 0.0223(16) | 0.0177(15) | 0.0035(12)  | -0.0083(13) | -0.0102(13) |
| C(20) | 0.0184(16) | 0.0145(14) | 0.0066(12) | 0.0022(10)  | -0.0045(12) | -0.0058(12) |
| C(21) | 0.0187(16) | 0.0198(16) | 0.0311(16) | -0.0031(13) | -0.0134(13) | -0.0059(13) |
| C(22) | 0.0179(16) | 0.0194(16) | 0.0327(17) | -0.0050(13) | -0.0121(14) | -0.0023(13) |
| C(23) | 0.0267(17) | 0.0137(14) | 0.0143(13) | -0.0018(11) | -0.0044(13) | -0.0021(13) |
| C(24) | 0.0317(18) | 0.0181(16) | 0.0389(18) | -0.0046(13) | -0.0156(15) | -0.0120(14) |
| C(25) | 0.0161(16) | 0.0282(18) | 0.0341(17) | -0.0053(14) | -0.0095(14) | -0.0084(13) |
| N(3)  | 0.015(2)   | 0.014(2)   | 0.016(2)   | -0.0016(18) | -0.005(2)   | 0.0010(19)  |
| O(1)  | 0.024(2)   | 0.021(2)   | 0.018(2)   | 0.0010(16)  | -0.0085(18) | -0.0052(17) |

<sup>a</sup>The estimated standard deviations of the least significant digits are given in parentheses. The anisotropic displacement factor exponent takes the form:  $-2 \pi [\text{h}^2 U_{11} + \dots + 2 \text{h k a}^* \text{b}^* U_{12}]$ .

**Table S6.** Hydrogen Atom Coordinates and Equivalent Isotropic Displacement Parameters ( $\text{\AA}^2$ ) for  $[\text{Fe}(\text{TPP})(\text{NO})]$  at 33 K, crystal 1<sup>a</sup>

| atom  | $x$     | $y$    | $z$     | $U(\text{eq})$ |
|-------|---------|--------|---------|----------------|
| H(b1) | 0.4997  | 0.8851 | 0.1184  | 0.023          |
| H(b2) | 0.3190  | 1.0213 | 0.3427  | 0.021          |
| H(b3) | 0.1283  | 0.8885 | 0.8816  | 0.021          |
| H(b4) | 0.1714  | 0.6614 | 1.0155  | 0.022          |
| H(11) | 0.9037  | 0.6342 | -0.0148 | 0.023          |
| H(12) | 0.9997  | 0.6947 | -0.2537 | 0.024          |
| H(13) | 0.8481  | 0.7203 | -0.3866 | 0.023          |
| H(14) | 0.5962  | 0.6951 | -0.2783 | 0.027          |
| H(15) | 0.4993  | 0.6364 | -0.0397 | 0.024          |
| H(21) | -0.0250 | 0.9899 | 0.6442  | 0.026          |
| H(22) | -0.1789 | 1.2298 | 0.7043  | 0.028          |
| H(23) | -0.0649 | 1.3957 | 0.7234  | 0.025          |
| H(24) | 0.2032  | 1.3198 | 0.6845  | 0.033          |
| H(25) | 0.3577  | 1.0807 | 0.6217  | 0.030          |

<sup>a</sup> $U(\text{eq})$  is defined as one third of the trace of the orthogonalized  $\mathbf{U}_{ij}$  tensor the estimated standard deviations of the least significant digits are given in parentheses.

## Supporting Information

**Table S7.** Complete Crystallographic Details for [Fe(TPP)(NO)] at 90 K, crystal 1

|                                                              |                                                                 |
|--------------------------------------------------------------|-----------------------------------------------------------------|
| formula                                                      | C <sub>44</sub> H <sub>28</sub> FeN <sub>5</sub> O              |
| FW, amu                                                      | 698.56                                                          |
| <i>a</i> , Å                                                 | 9.754(2)                                                        |
| <i>b</i> , Å                                                 | 9.943(2)                                                        |
| <i>c</i> , Å                                                 | 10.394(3)                                                       |
| $\alpha$ , deg                                               | 82.25(2)                                                        |
| $\beta$ , deg                                                | 65.78(2)                                                        |
| $\gamma$ , deg                                               | 69.44(2)                                                        |
| <i>V</i> , Å <sup>3</sup>                                    | 860.7(4)                                                        |
| space group                                                  | <i>P</i> $\bar{1}$                                              |
| <i>Z</i>                                                     | 1                                                               |
| D <sub>c</sub> , g/cm <sup>3</sup>                           | 1.348                                                           |
| F(000)                                                       | 361                                                             |
| $\mu$ , mm <sup>-1</sup>                                     | 0.481                                                           |
| crystal dimensions, mm                                       | 0.21 × 0.17 × 0.08                                              |
| radiation                                                    | MoK $\alpha$ , $\bar{\lambda}$ = 0.71073 Å                      |
| temperature, K                                               | 90(2)                                                           |
| diffractometer                                               | Bruker SMART Apex II                                            |
| $\theta$ range for collected data, deg                       | 3.05–27.71                                                      |
| index range                                                  | –11 ≤ <i>h</i> ≤ 12<br>–12 ≤ <i>k</i> ≤ 12<br>0 ≤ <i>l</i> ≤ 13 |
| total data collected                                         | 4337                                                            |
| absorption correction                                        | Semi-empirical fromequiv                                        |
| relative transmission coefficients (I)                       | 0.9625 and 0.9057                                               |
| unique data                                                  | 4337 ( <i>R</i> <sub>int</sub> = 0.0649)                        |
| unique observed data [ <i>I</i> > 2 $\sigma$ ( <i>I</i> )]   | 2843                                                            |
| refinement method                                            | Full-matrix least-squares on <i>F</i> <sup>2</sup>              |
| data/restraints/parameters                                   | 4337/0/247                                                      |
| goodness-of-fit (pased on <i>F</i> <sup>2</sup> )            | 0.949                                                           |
| final <i>R</i> indices [ <i>I</i> > 2 $\sigma$ ( <i>I</i> )] | <i>R</i> <sub>1</sub> = 0.0476, <i>wR</i> <sub>2</sub> = 0.1084 |
| final <i>R</i> indices (all data)                            | <i>R</i> <sub>1</sub> = 0.0792, <i>wR</i> <sub>2</sub> = 0.1174 |



**Table S8.** Atomic Coordinates and Equivalent Isotropic Displacement Parameters ( $\text{\AA}^2$ ) for [Fe(TPP)(NO)] at 90 K, crystal 1<sup>a</sup>

| atom  | <i>x</i>   | <i>y</i>    | <i>z</i>    | <i>U</i> (eq) |
|-------|------------|-------------|-------------|---------------|
| Fe(1) | 0.4801(5)  | 0.4983(7)   | 0.4996(7)   | 0.0196(5)     |
| N(1)  | 0.4632(2)  | 0.68161(18) | 0.39282(19) | 0.0200(4)     |
| N(2)  | 0.3569(2)  | 0.60885(18) | 0.67908(19) | 0.0200(4)     |
| C(m1) | 0.6311(3)  | 0.5886(2)   | 0.1495(2)   | 0.0207(5)     |
| C(m2) | 0.2809(3)  | 0.8545(2)   | 0.5876(2)   | 0.0204(5)     |
| C(a1) | 0.5269(3)  | 0.6981(2)   | 0.2478(2)   | 0.0216(5)     |
| C(a2) | 0.3685(3)  | 0.8177(2)   | 0.4459(2)   | 0.0214(5)     |
| C(a3) | 0.2780(3)  | 0.7553(2)   | 0.6961(2)   | 0.0223(5)     |
| C(a4) | 0.3168(3)  | 0.5555(2)   | 0.8143(2)   | 0.0220(5)     |
| C(b1) | 0.4713(3)  | 0.8458(2)   | 0.2116(2)   | 0.0255(5)     |
| C(b2) | 0.3731(3)  | 0.9198(2)   | 0.3333(2)   | 0.0239(5)     |
| C(b3) | 0.1902(3)  | 0.7928(2)   | 0.8432(2)   | 0.0270(6)     |
| C(b4) | 0.2127(3)  | 0.6696(2)   | 0.9164(2)   | 0.0253(5)     |
| C(10) | 0.6911(3)  | 0.6278(2)   | -0.0037(2)  | 0.0212(5)     |
| C(11) | 0.8386(3)  | 0.6462(3)   | -0.0685(3)  | 0.0283(6)     |
| C(12) | 0.8962(3)  | 0.6813(2)   | -0.2102(3)  | 0.0296(6)     |
| C(13) | 0.8053(3)  | 0.6981(2)   | -0.2885(2)  | 0.0273(6)     |
| C(14) | 0.6577(3)  | 0.6817(3)   | -0.2243(3)  | 0.0334(6)     |
| C(15) | 0.6005(3)  | 0.6464(3)   | -0.0822(3)  | 0.0311(6)     |
| C(20) | 0.1829(3)  | 1.0092(2)   | 0.6270(2)   | 0.0205(5)     |
| C(21) | 0.0226(3)  | 1.0579(2)   | 0.6517(3)   | 0.0303(6)     |
| C(22) | -0.0682(3) | 1.2007(3)   | 0.6866(3)   | 0.0338(6)     |
| C(23) | 0.0000(3)  | 1.2964(2)   | 0.6988(2)   | 0.0283(6)     |
| C(24) | 0.1592(3)  | 1.2479(3)   | 0.6761(3)   | 0.0369(7)     |
| C(25) | 0.2502(3)  | 1.1054(3)   | 0.6397(3)   | 0.0340(6)     |
| N(3)  | 0.3085(5)  | 0.4907(4)   | 0.4910(4)   | 0.0198(8)     |
| O(1)  | 0.1798(4)  | 0.5546(4)   | 0.5029(4)   | 0.0336(8)     |

<sup>a</sup>*U*(eq) is defined as one third of the trace of the orthogonalized  $\mathbf{U}_{ij}$  tensor. The estimated standard deviations of the least significant digits are given in parentheses.

**Table S9.** Bond Lengths for [Fe(TPP)(NO)] at 90 K, crystal 1<sup>a</sup>

| bond           | length (Å) | bond          | length (Å) |
|----------------|------------|---------------|------------|
| Fe(1)–Fe(1)#1) | 0.406(5)   | C(b3)–H(b3)   | 0.9500     |
| Fe(1)–N(3)     | 1.740(5)   | C(b4)–H(b4)   | 0.9500     |
| Fe(1)–N(2)     | 1.980(7)   | C(10)–C(11)   | 1.383(3)   |
| Fe(1)–N(1)     | 1.994(7)   | C(10)–C(15)   | 1.385(3)   |
| Fe(1)–N(1)#1)  | 2.007(7)   | C(11)–C(12)   | 1.389(3)   |
| Fe(1)–N(2)#1)  | 2.008(7)   | C(11)–H(11)   | 0.9500     |
| Fe(1)–N(3)#1)  | 2.146(5)   | C(12)–C(13)   | 1.388(3)   |
| N(1)–C(a2)     | 1.376(3)   | C(12)–H(12)   | 0.9500     |
| N(1)–C(a1)     | 1.387(3)   | C(13)–C(14)   | 1.376(4)   |
| N(1)–Fe(1)#1)  | 2.007(7)   | C(13)–H(13)   | 0.9500     |
| N(2)–C(a4)     | 1.380(3)   | C(14)–C(15)   | 1.392(3)   |
| N(2)–C(a3)     | 1.384(3)   | C(14)–H(14)   | 0.9500     |
| N(2)–Fe(1)#1)  | 2.008(7)   | C(15)–H(15)   | 0.9500     |
| C(m1)–C(a1)    | 1.390(3)   | C(20)–C(25)   | 1.383(3)   |
| C(m1)–C(a4#1)  | 1.397(3)   | C(20)–C(21)   | 1.384(3)   |
| C(m1)–C(10)    | 1.503(3)   | C(21)–C(22)   | 1.386(3)   |
| C(m2)–C(a2)    | 1.388(3)   | C(21)–H(21)   | 0.9500     |
| C(m2)–C(a3)    | 1.393(3)   | C(22)–C(23)   | 1.383(4)   |
| C(m2)–C(20)    | 1.504(3)   | C(22)–H(22)   | 0.9500     |
| C(a1)–C(b1)    | 1.433(3)   | C(23)–C(24)   | 1.379(4)   |
| C(a2)–C(b2)    | 1.439(3)   | C(23)–H(23)   | 0.9500     |
| C(a3)–C(b3)    | 1.437(3)   | C(24)–C(25)   | 1.387(3)   |
| C(a4)–C(m1#1)  | 1.397(3)   | C(24)–H(24a)  | 0.9500     |
| C(a4)–C(b4)    | 1.441(3)   | C(25)–H(25a)  | 0.9500     |
| C(b1)–C(b2)    | 1.349(3)   | N(3)–O(1)     | 1.153(4)   |
| C(b1)–H(b1)    | 0.9500     | N(3)–Fe(1)#1) | 2.146(5)   |
| C(b2)–H(b2)    | 0.9500     |               |            |
| C(b3)–C(b4)    | 1.351(3)   |               |            |

<sup>a</sup>The estimated standard deviations of the least significant digits are given in parentheses.

**Table S10.** Bond Angles for [Fe(TPP)(NO)] at 90 K, crystal 1<sup>a</sup>

| angle                | degree     | angle              | degree     |
|----------------------|------------|--------------------|------------|
| Fe(1)#1–Fe(1)–N(3)   | 177(2)     | C(b2)–C(b1)–H(b1)  | 126.4      |
| Fe(1)#1–Fe(1)–N(2)   | 88.1(19)   | C(a1)–C(b1)–H(b1)  | 126.4      |
| N(3)–Fe(1)–N(2)      | 92.0(3)    | C(b1)–C(b2)–C(a2)  | 106.99(19) |
| Fe(1)#1–Fe(1)–N(1)   | 86.1(18)   | C(b1)–C(b2)–H(b2)  | 126.5      |
| N(3)–Fe(1)–N(1)      | 91.2(3)    | C(a2)–C(b2)–H(b2)  | 126.5      |
| N(2)–Fe(1)–N(1)      | 89.8(3)    | C(b4)–C(b3)–C(a3)  | 107.1(2)   |
| Fe(1)#1–Fe(1)–N(1)#1 | 82.3(18)   | C(b4)–C(b3)–H(b3)  | 126.5      |
| N(3)–Fe(1)–N(1)#1    | 100.5(3)   | C(a3)–C(b3)–H(b2)  | 126.5      |
| N(2)–Fe(1)–N(1)#1    | 89.8(3)    | C(b3)–C(b4)–C(a4)  | 106.8(2)   |
| N(1)–Fe(1)–N(1)#1    | 168.35(16) | C(b3)–C(b4)–H(b4)  | 126.6      |
| Fe(1)#1–Fe(1)–N(2)#1 | 80.2(18)   | C(a4)–C(b4)–H(b4)  | 126.6      |
| N(3)–Fe(1)–N(2)#1    | 99.6(3)    | C(11)–C(10)–C(15)  | 118.9(2)   |
| N(2)–Fe(1)–N(2)#1    | 168.33(16) | C(11)–C(10)–C(m1)  | 120.2(2)   |
| N(1)–Fe(1)–N(2)#1    | 89.4(3)    | C(15)–C(10)–C(m1)  | 120.9(2)   |
| N(1)#1–Fe(1)–N(2)#1  | 88.6(3)    | C(10)–C(11)–C(12)  | 120.8(2)   |
| Fe(1)#1–Fe(1)–N(3)#1 | 2.2(17)    | C(10)–C(11)–H(11)  | 119.6      |
| N(3)–Fe(1)–N(3)#1    | 179.5(4)   | C(12)–C(11)–H(11)  | 119.6      |
| N(2)–Fe(1)–N(3)#1    | 88.0(2)    | C(13)–C(12)–C(11)  | 119.9(2)   |
| N(1)–Fe(1)–N(3)#1    | 88.3(2)    | C(13)–C(12)–H(12)  | 120.1      |
| N(1)#1–Fe(1)–N(3)#1  | 80.1(2)    | C(11)–C(12)–H(12)  | 120.1      |
| N(2)#1–Fe(1)–N(3)#1  | 80.3(2)    | C(14)–C(13)–C(12)  | 119.6(2)   |
| C(a2)–N(1)–C(a1)     | 104.98(17) | C(14)–C(13)–H(13)  | 120.2      |
| C(a2)–N(1)–Fe(1)     | 127.1(2)   | C(12)–C(13)–H(13)  | 120.2      |
| C(a1)–N(1)–Fe(1)     | 127.5(2)   | C(13)–C(14)–C(15)  | 120.3(2)   |
| C(a2)–N(1)–Fe(1)#1   | 127.9(2)   | C(13)–C(14)–H(14a) | 119.8      |
| C(a1)–N(1)–Fe(1)#1   | 126.7(2)   | C(15)–C(14)–H(14a) | 119.8      |
| C(a4)–N(2)–C(a3)     | 104.82(17) | C(10)–C(15)–C(14)  | 120.5(2)   |
| C(a4)–N(2)–Fe(1)     | 127.5(2)   | C(10)–C(15)–H(15)  | 119.8      |
| C(a3)–N(2)–Fe(1)     | 127.3(2)   | C(14)–C(15)–H(15)  | 119.8      |
| C(a4)–N(2)–Fe(1)#1   | 127.1(2)   | C(25)–C(20)–C(21)  | 118.6(2)   |
| C(a3)–N(2)–Fe(1)#1   | 127.5(2)   | C(25)–C(20)–C(m2)  | 120.9(2)   |
| C(a1)–C(m1)–C(a4)#1  | 123.5(2)   | C(21)–C(20)–C(m2)  | 120.4(2)   |
| C(a1)–C(m1)–C(10)    | 118.05(18) | C(20)–C(21)–C(22)  | 120.8(2)   |
| C(a4#1)–C(m1)–C(10)  | 118.42(19) | C(20)–C(21)–H(21)  | 119.6      |

**Table S10.** Continued

| angle               | degree     | angle             | degree   |
|---------------------|------------|-------------------|----------|
| C(a2)–C(m2)–C(a3)   | 123.4(2)   | C(22)–C(21)–H(21) | 119.6    |
| C(a2)–C(m2)–C(20)   | 118.72(18) | C(23)–C(22)–C(21) | 120.3(2) |
| C(a3)–C(m2)–C(20)   | 117.90(19) | C(23)–C(22)–H(22) | 119.8    |
| N(1)–C(a1)–C(m1)    | 125.66(19) | C(21)–C(22)–H(22) | 119.8    |
| N(1)–C(a1)–C(b1)    | 110.39(18) | C(24)–C(23)–C(22) | 119.1(2) |
| C(m1)–C(a1)–C(b1)   | 123.9(2)   | C(24)–C(23)–H(2a) | 120.4    |
| N(1)–C(a2)–C(m2)    | 125.8(2)   | C(22)–C(23)–H(23) | 120.4    |
| N(1)–C(a2)–C(b2)    | 110.51(19) | C(23)–C(24)–C(25) | 120.5(2) |
| C(m2)–C(a2)–C(b2)   | 123.7(2)   | C(23)–C(24)–H(24) | 119.7    |
| N(2)–C(a3)–C(m2)    | 125.7(2)   | C(25)–C(24)–H(24) | 119.7    |
| N(2)–C(a3)–C(b3)    | 110.57(18) | C(20)–C(25)–C(24) | 120.7(2) |
| C(m2)–C(a3)–C(b3)   | 123.8(2)   | C(20)–C(25)–H(25) | 119.7    |
| N(2)–C(a4)–C(m1#1)  | 125.74(19) | C(24)–C(25)–H(25) | 119.7    |
| N(2)–C(a4)–C(b4)    | 110.72(18) | O(1)–N(3)–Fe(1)   | 145.6(4) |
| C(m1#1)–C(a4)–C(b4) | 123.5(2)   | O(1)–N(3)–Fe(1)#1 | 145.2(4) |
| C(b2)–C(b1)–C(a1)   | 107.13(19) |                   |          |

<sup>a</sup>The estimated standard deviations of the least significant digits are given in parentheses.

**Table S11.** Anisotropic Displacement Parameters ( $\text{\AA}^2$ ) for  $[\text{Fe}(\text{TPP})(\text{NO})]$  at 90 K, crystal 1<sup>a</sup>

| atom  | $U_{11}$   | $U_{22}$   | $U_{33}$   | $U_{23}$    | $U_{13}$    | $U_{12}$    |
|-------|------------|------------|------------|-------------|-------------|-------------|
| Fe(1) | 0.0213(19) | 0.0187(4)  | 0.0143(3)  | 0.0007(2)   | -0.0038(13) | -0.0052(12) |
| N(1)  | 0.0198(11) | 0.0192(9)  | 0.0158(10) | -0.0001(7)  | -0.0051(8)  | -0.0027(8)  |
| N(2)  | 0.0189(11) | 0.0185(9)  | 0.0167(10) | 0.0013(7)   | -0.0056(9)  | -0.0016(8)  |
| C(m1) | 0.0214(13) | 0.0236(11) | 0.0150(11) | 0.0030(8)   | -0.0069(10) | -0.0061(10) |
| C(m2) | 0.0186(13) | 0.0208(11) | 0.0191(12) | -0.0030(9)  | -0.0066(10) | -0.0033(9)  |
| C(a1) | 0.0234(14) | 0.0255(12) | 0.0144(11) | 0.0034(9)   | -0.0070(10) | -0.0078(10) |
| C(a2) | 0.0188(13) | 0.0214(11) | 0.0208(12) | -0.0007(8)  | -0.0062(10) | -0.0045(10) |
| C(a3) | 0.0212(14) | 0.0224(12) | 0.0196(12) | -0.0014(9)  | -0.0074(10) | -0.0029(10) |
| C(a4) | 0.0213(14) | 0.0248(12) | 0.0171(11) | 0.0005(9)   | -0.0069(10) | -0.0052(10) |
| C(b1) | 0.0288(15) | 0.0244(12) | 0.0171(12) | 0.0037(9)   | -0.0067(11) | -0.0054(10) |
| C(b2) | 0.0261(14) | 0.0204(11) | 0.0208(12) | 0.0016(9)   | -0.0085(11) | -0.0040(10) |
| C(b3) | 0.0289(15) | 0.0241(12) | 0.0191(12) | -0.0029(9)  | -0.0063(11) | -0.0009(10) |
| C(b4) | 0.0262(15) | 0.0271(13) | 0.0140(11) | -0.0007(9)  | -0.0049(10) | -0.0021(11) |
| C(10) | 0.0261(14) | 0.0157(11) | 0.0165(11) | 0.0001(8)   | -0.0062(10) | -0.0032(10) |
| C(11) | 0.0256(15) | 0.0341(14) | 0.0229(13) | 0.0019(10)  | -0.0098(11) | -0.0076(11) |
| C(12) | 0.0288(15) | 0.0298(13) | 0.0236(13) | 0.0023(10)  | -0.0043(11) | -0.0097(11) |
| C(13) | 0.0400(17) | 0.0184(11) | 0.0151(11) | 0.0032(9)   | -0.0064(11) | -0.0063(11) |
| C(14) | 0.0448(18) | 0.0363(15) | 0.0238(14) | 0.0067(11)  | -0.0201(13) | -0.0130(13) |
| C(15) | 0.0312(15) | 0.0402(15) | 0.0240(14) | 0.0057(11)  | -0.0112(12) | -0.0157(12) |
| C(20) | 0.0256(14) | 0.0187(11) | 0.0133(11) | 0.0002(8)   | -0.0062(10) | -0.0045(10) |
| C(21) | 0.0247(15) | 0.0241(13) | 0.0450(16) | -0.0056(11) | -0.0159(13) | -0.0063(11) |
| C(22) | 0.0249(15) | 0.0285(14) | 0.0452(17) | -0.0070(11) | -0.0153(13) | -0.0009(11) |
| C(23) | 0.0367(17) | 0.0202(11) | 0.0182(12) | -0.0030(9)  | -0.0055(11) | -0.0032(11) |
| C(24) | 0.0444(19) | 0.0263(14) | 0.0446(17) | -0.0064(11) | -0.0173(14) | -0.0145(12) |
| C(25) | 0.0266(15) | 0.0303(14) | 0.0478(17) | -0.0057(12) | -0.0147(13) | -0.0100(11) |
| N(3)  | 0.020(2)   | 0.0179(19) | 0.0145(19) | 0.0027(14)  | -0.0048(17) | -0.0018(16) |
| O(1)  | 0.023(2)   | 0.043(2)   | 0.031(2)   | 0.0001(16)  | -0.0105(17) | -0.0073(17) |

<sup>a</sup>The estimated standard deviations of the least significant digits are given in parentheses. The anisotropic displacement factor exponent takes the form:  $-2 \pi [\text{h}^2 U_{11} + \dots + 2 \text{h k a}^* \text{b}^* U_{12}]$ .

**Table S12.** Hydrogen Atom Coordinates and Equivalent Isotropic Displacement Parameters ( $\text{\AA}^2$ ) for  $[\text{Fe}(\text{TPP})(\text{NO})]$  at 90 K, crystal 1<sup>a</sup>

| atom  | $x$     | $y$    | $z$     | $U(\text{eq})$ |
|-------|---------|--------|---------|----------------|
| H(b1) | 0.4984  | 0.8845 | 0.1192  | 0.031          |
| H(b2) | 0.3177  | 1.0202 | 0.3428  | 0.029          |
| H(b3) | 0.1281  | 0.8867 | 0.8818  | 0.032          |
| H(b4) | 0.1683  | 0.6600 | 1.0160  | 0.030          |
| H(11) | 0.9013  | 0.6346 | -0.0153 | 0.034          |
| H(12) | 0.9976  | 0.6938 | -0.2536 | 0.036          |
| H(13) | 0.8448  | 0.7207 | -0.3858 | 0.033          |
| H(14) | 0.5945  | 0.6946 | -0.2772 | 0.040          |
| H(15) | 0.4985  | 0.6350 | -0.0387 | 0.037          |
| H(21) | -0.0258 | 0.9928 | 0.6447  | 0.036          |
| H(22) | -0.1777 | 1.2328 | 0.7021  | 0.041          |
| H(23) | -0.0619 | 1.3943 | 0.7226  | 0.034          |
| H(24) | 0.2068  | 1.3126 | 0.6853  | 0.044          |
| H(25) | 0.3600  | 1.0736 | 0.6234  | 0.041          |

<sup>a</sup> $U(\text{eq})$  is defined as one third of the trace of the orthogonalized  $\mathbf{U}_{ij}$  tensor the estimated standard deviations of the least significant digits are given in parentheses.

## Supporting Information

**Table S13.** Complete Crystallographic Details for [Fe(TPP)(NO)] at 100 K, crystal 2

|                                                              |                                                                 |
|--------------------------------------------------------------|-----------------------------------------------------------------|
| formula                                                      | C <sub>44</sub> H <sub>28</sub> FeN <sub>5</sub> O              |
| FW, amu                                                      | 698.56                                                          |
| <i>a</i> , Å                                                 | 9.7310(8)                                                       |
| <i>b</i> , Å                                                 | 9.9238(8)                                                       |
| <i>c</i> , Å                                                 | 10.3902(6)                                                      |
| $\alpha$ , deg                                               | 82.1950(10)                                                     |
| $\beta$ , deg                                                | 65.693(4)                                                       |
| $\gamma$ , deg                                               | 69.384(5)                                                       |
| <i>V</i> , Å <sup>3</sup>                                    | 855.81(11)                                                      |
| space group                                                  | <i>P</i> $\bar{1}$                                              |
| <i>Z</i>                                                     | 1                                                               |
| D <sub>c</sub> , g/cm <sup>3</sup>                           | 1.355                                                           |
| F(000)                                                       | 361                                                             |
| $\mu$ , mm <sup>-1</sup>                                     | 0.484                                                           |
| crystal dimensions, mm                                       | 0.21 × 0.20 × 0.05                                              |
| radiation                                                    | MoK $\alpha$ , $\bar{\lambda}$ = 0.71073 Å                      |
| temperature, K                                               | 100(2)                                                          |
| diffractometer                                               | Bruker Apex CCD                                                 |
| $\theta$ range for collected data, deg                       | 2.15–31.22                                                      |
| index range                                                  | –12 ≤ <i>h</i> ≤ 14<br>–14 ≤ <i>k</i> ≤ 14<br>0 ≤ <i>l</i> ≤ 15 |
| total data collected                                         | 6497                                                            |
| absorption correction                                        | Semi-empirical fromequiv                                        |
| relative transmission coefficients (I)                       | 0.9785 and 0.9064                                               |
| unique data                                                  | 6497 ( <i>R</i> <sub>int</sub> = 0.0646)                        |
| unique observed data [ <i>I</i> > 2 $\sigma$ ( <i>I</i> )]   | 4766                                                            |
| refinement method                                            | Full-matrix least-squares on <i>F</i> <sup>2</sup>              |
| data/restraints/parameters                                   | 6497/0/247                                                      |
| goodness-of-fit (pased on <i>F</i> <sup>2</sup> )            | 0.994                                                           |
| final <i>R</i> indices [ <i>I</i> > 2 $\sigma$ ( <i>I</i> )] | <i>R</i> <sub>1</sub> = 0.0449, <i>wR</i> <sub>2</sub> = 0.1213 |
| final <i>R</i> indices (all data)                            | <i>R</i> <sub>1</sub> = 0.0660, <i>wR</i> <sub>2</sub> = 0.1309 |

**Table S14.** Atomic Coordinates and Equivalent Isotropic Displacement Parameters ( $\text{\AA}^2$ ) for [Fe(TPP)(NO)] at 100 K, crystal 2<sup>a</sup>

| atom  | <i>x</i>    | <i>y</i>    | <i>z</i>     | <i>U</i> (eq) |
|-------|-------------|-------------|--------------|---------------|
| Fe(1) | 0.4807(3)   | 0.4983(4)   | 0.4986(4)    | 0.0166(3)     |
| N(1)  | 0.46321(16) | 0.68120(13) | 0.39278(13)  | 0.0174(3)     |
| N(2)  | 0.35704(16) | 0.60896(14) | 0.67936(13)  | 0.0179(3)     |
| C(m1) | 0.6314(2)   | 0.58824(17) | 0.14934(15)  | 0.0180(3)     |
| C(m2) | 0.28062(19) | 0.85505(16) | 0.58793(16)  | 0.0169(3)     |
| C(a1) | 0.52685(19) | 0.69787(16) | 0.24781(15)  | 0.0183(3)     |
| C(a2) | 0.3682(2)   | 0.81761(16) | 0.44628(15)  | 0.0173(3)     |
| C(a3) | 0.2786(2)   | 0.75531(16) | 0.69620(16)  | 0.0179(3)     |
| C(a4) | 0.31648(19) | 0.55493(16) | 0.81498(15)  | 0.0185(3)     |
| C(b1) | 0.4710(2)   | 0.84603(16) | 0.21156(16)  | 0.0217(3)     |
| C(b2) | 0.3725(2)   | 0.92018(16) | 0.33371(16)  | 0.0207(3)     |
| C(b3) | 0.1905(2)   | 0.79302(17) | 0.84369(16)  | 0.0217(3)     |
| C(b4) | 0.2132(2)   | 0.66964(17) | 0.91643(16)  | 0.0223(3)     |
| C(10) | 0.6918(2)   | 0.62742(16) | −0.00410(15) | 0.0188(3)     |
| C(11) | 0.8390(2)   | 0.64617(19) | −0.06820(17) | 0.0255(4)     |
| C(12) | 0.8963(2)   | 0.68176(19) | −0.21056(17) | 0.0268(4)     |
| C(13) | 0.8059(2)   | 0.69778(16) | −0.28827(16) | 0.0249(4)     |
| C(14) | 0.6569(2)   | 0.6822(2)   | −0.22403(18) | 0.0301(4)     |
| C(15) | 0.5997(2)   | 0.64677(19) | −0.08165(18) | 0.0270(4)     |
| C(20) | 0.1832(2)   | 1.00909(16) | 0.62716(15)  | 0.0176(3)     |
| C(21) | 0.0225(2)   | 1.05790(19) | 0.6516(2)    | 0.0276(4)     |
| C(22) | −0.0683(2)  | 1.20081(19) | 0.6872(2)    | 0.0312(4)     |
| C(23) | −0.0002(2)  | 1.29624(17) | 0.69867(16)  | 0.0246(4)     |
| C(24) | 0.1591(2)   | 1.2478(2)   | 0.6765(2)    | 0.0334(4)     |
| C(25) | 0.2498(2)   | 1.1053(2)   | 0.6402(2)    | 0.0313(4)     |
| N(3)  | 0.3097(3)   | 0.4904(3)   | 0.4908(3)    | 0.0165(5)     |
| O(1)  | 0.1797(3)   | 0.5554(3)   | 0.5026(3)    | 0.0287(5)     |

<sup>a</sup> *U*(eq) is defined as one third of the trace of the orthogonalized  $\mathbf{U}_{ij}$  tensor. The estimated standard deviations of the least significant digits are given in parentheses.



**Table S15.** Bond Lengths for [Fe(TPP)(NO)] at 100 K, crystal 2<sup>a</sup>

| bond          | length (Å) | bond         | length (Å) |
|---------------|------------|--------------|------------|
| Fe(1)–Fe(1)#1 | 0.402(3)   | C(b3)–H(b3)  | 0.9500     |
| Fe(1)–N(3)    | 1.728(3)   | C(b4)–H(b4)  | 0.9500     |
| Fe(1)–N(1)    | 1.981(4)   | C(10)–C(11)  | 1.378(2)   |
| Fe(1)–N(2)    | 1.988(4)   | C(10)–C(15)  | 1.386(2)   |
| Fe(1)–N(2)#1  | 1.998(4)   | C(11)–C(12)  | 1.393(2)   |
| Fe(1)–N(1)#1  | 2.006(4)   | C(11)–H(11)  | 0.9500     |
| Fe(1)–N(3)#1  | 2.129(3)   | C(12)–C(13)  | 1.379(3)   |
| N(1)–C(a2)    | 1.3772(19) | C(12)–H(12)  | 0.9500     |
| N(1)–C(a1)    | 1.3843(18) | C(13)–C(14)  | 1.380(3)   |
| N(1)–Fe(1)#1  | 2.006(4)   | C(13)–H(13)  | 0.9500     |
| N(2)–C(a3)    | 1.3787(19) | C(14)–C(15)  | 1.393(2)   |
| N(2)–C(a4)    | 1.3838(18) | C(14)–H(14)  | 0.9500     |
| N(2)–Fe(1)#1  | 1.998(4)   | C(15)–H(15)  | 0.9500     |
| C(m1)–C(a4#1) | 1.385(2)   | C(20)–C(25)  | 1.376(2)   |
| C(m1)–C(a1)   | 1.390(2)   | C(20)–C(21)  | 1.385(2)   |
| C(m1)–C(10)   | 1.503(2)   | C(21)–C(22)  | 1.386(2)   |
| C(m2)–C(a2)   | 1.387(2)   | C(21)–H(21)  | 0.9500     |
| C(m2)–C(a3)   | 1.392(2)   | C(22)–C(23)  | 1.374(3)   |
| C(m2)–C(20)   | 1.494(2)   | C(22)–H(22)  | 0.9500     |
| C(a1)–C(b1)   | 1.433(2)   | C(23)–C(24)  | 1.378(3)   |
| C(a2)–C(b2)   | 1.439(2)   | C(23)–H(23)  | 0.9500     |
| C(a3)–C(b3)   | 1.439(2)   | C(24)–C(25)  | 1.383(3)   |
| C(a4)–C(m1#1) | 1.385(2)   | C(24)–H(24)  | 0.9500     |
| C(a4)–C(b4)   | 1.437(2)   | C(25)–H(25)  | 0.9500     |
| C(b1)–C(b2)   | 1.351(2)   | N(3)–O(1)    | 1.163(3)   |
| C(b1)–H(ba)   | 0.9500     | N(3)–Fe(1)#1 | 2.129(3)   |
| C(b2)–H(bb)   | 0.9500     |              |            |
| C(b3)–C(b4)   | 1.347(2)   |              |            |

<sup>a</sup>The estimated standard deviations of the least significant digits are given in parentheses.

**Table S16.** Bond Angles for [Fe(TPP)(NO)] at 100 K, crystal 2<sup>a</sup>

| angle                | degree     | angle             | degree     |
|----------------------|------------|-------------------|------------|
| Fe(1)#1–Fe(1)–N(3)   | 177.6(12)  | C(b2)–C(b1)–H(b1) | 126.5      |
| Fe(1)#1–Fe(1)–N(1)   | 87.7(11)   | C(a1)–C(b1)–H(b1) | 126.5      |
| N(3)–Fe(1)–N(1)      | 91.34(16)  | C(b1)–C(b2)–C(a2) | 106.93(13) |
| Fe(1)#1–Fe(1)–N(2)   | 85.7(11)   | C(b1)–C(b2)–H(b2) | 126.5      |
| N(3)–Fe(1)–N(2)      | 92.10(16)  | C(a2)–C(b2)–H(b2) | 126.5      |
| N(1)–Fe(1)–N(2)      | 89.86(16)  | C(b4)–C(b3)–C(a3) | 106.96(13) |
| Fe(1)#1–Fe(1)–N(2)#1 | 82.7(11)   | C(b4)–C(b3)–H(b3) | 126.5      |
| N(3)–Fe(1)–N(2)#1    | 99.48(17)  | C(a3)–C(b3)–H(b3) | 126.5      |
| N(1)–Fe(1)–N(2)#1    | 89.67(17)  | C(b3)–C(b4)–C(a4) | 107.20(13) |
| N(2)–Fe(1)–N(2)#1    | 168.42(8)  | C(b3)–C(b4)–H(b4) | 126.4      |
| Fe(1)#1–Fe(1)–N(1)#1 | 80.8(11)   | C(a4)–C(b4)–H(b4) | 126.4      |
| N(3)–Fe(1)–N(1)#1    | 100.21(17) | C(11)–C(10)–C(15) | 119.51(14) |
| N(1)–Fe(1)–N(1)#1    | 168.44(8)  | C(11)–C(10)–C(m1) | 119.94(15) |
| N(2)–Fe(1)–N(1)#1    | 89.28(16)  | C(15)–C(10)–C(m1) | 120.54(15) |
| N(2)#1–Fe(1)–N(1)#1  | 88.87(15)  | C(10)–C(11)–C(12) | 120.32(16) |
| Fe(1)#1–Fe(1)–N(3)#1 | 1.9(10)    | C(10)–C(11)–H(11) | 119.8      |
| N(3)–Fe(1)–N(3)#1    | 179.5(2)   | C(12)–C(11)–H(11) | 119.8      |
| N(1)–Fe(1)–N(3)#1    | 88.48(13)  | C(13)–C(12)–C(11) | 120.05(17) |
| N(2)–Fe(1)–N(3)#1    | 87.49(13)  | C(13)–C(12)–H(12) | 120.0      |
| N(2)#1–Fe(1)–N(3)#1  | 80.93(12)  | C(11)–C(12)–H(12) | 120.0      |
| N(1)#1–Fe(1)–N(3)#1  | 79.98(12)  | C(12)–C(13)–C(14) | 119.93(15) |
| C(a2)–N(1)–C(a1)     | 105.02(12) | C(12)–C(13)–H(13) | 120.0      |
| C(a2)–N(1)–Fe(1)     | 127.09(15) | C(14)–C(13)–H(13) | 120.0      |
| C(a1)–N(1)–Fe(1)     | 127.40(15) | C(13)–C(14)–C(15) | 119.98(17) |
| C(a2)–N(1)–Fe(1)#1   | 127.48(15) | C(13)–C(14)–H(14) | 120.0      |
| C(a1)–N(1)–Fe(1)#1   | 127.09(15) | C(15)–C(14)–H(14) | 120.0      |
| Fe(1)–N(1)–Fe(1)#1   | 11.56(8)   | C(10)–C(15)–C(14) | 120.17(17) |
| C(a3)–N(2)–C(a4)     | 105.02(12) | C(10)–C(15)–H(15) | 119.9      |
| C(a3)–N(2)–Fe(1)     | 127.05(15) | C(14)–C(15)–H(15) | 119.9      |
| C(a4)–N(2)–Fe(1)     | 127.59(15) | C(25)–C(20)–C(21) | 118.51(15) |
| C(a3)–N(2)–Fe(1)#1   | 127.49(15) | C(25)–C(20)–C(m2) | 121.29(15) |
| C(a4)–N(2)–Fe(1)#1   | 126.91(15) | C(21)–C(20)–C(m2) | 120.21(15) |
| Fe(1)–N(2)–Fe(1)#1   | 11.58(8)   | C(20)–C(21)–C(22) | 120.50(16) |
| C(a4#1)–C(m1)–C(a1)  | 123.55(14) | C(20)–C(21)–H(21) | 119.8      |

**Table S16.** Continued

| angle               | degree     | angle              | degree     |
|---------------------|------------|--------------------|------------|
| C(a4#1)–C(m1)–C(10) | 118.27(13) | C(22)–C(21)–H(21a) | 119.8      |
| C(a1)–C(m1)–C(10)   | 118.18(13) | C(23)–C(22)–C(21)  | 120.51(17) |
| C(a2)–C(m2)–C(a3)   | 122.99(14) | C(23)–C(22)–H(22a) | 119.7      |
| C(a2)–C(m2)–C(20)   | 118.91(13) | C(21)–C(22)–H(22a) | 119.7      |
| C(a3)–C(m2)–C(20)   | 118.10(14) | C(22)–C(23)–C(24)  | 119.24(15) |
| N(1)–C(a1)–C(m1)    | 125.65(14) | C(22)–C(23)–H(23a) | 120.4      |
| N(1)–C(a1)–C(b1)    | 110.49(13) | C(24)–C(23)–H(23a) | 120.4      |
| C(m1)–C(a1)–C(b1)   | 123.86(14) | C(23)–C(24)–C(25)  | 120.20(17) |
| N(1)–C(a2)–C(m2)    | 126.10(13) | C(23)–C(24)–H(24a) | 119.9      |
| N(1)–C(a2)–C(b2)    | 110.50(13) | C(25)–C(24)–H(24a) | 119.9      |
| C(m2)–C(a2)–C(b2)   | 123.40(14) | C(20)–C(25)–C(24)  | 121.04(17) |
| N(2)–C(a3)–C(m2)    | 125.92(14) | C(20)–C(25)–H(25a) | 119.5      |
| N(2)–C(a3)–C(b3)    | 110.50(13) | C(24)–C(25)–H(25a) | 119.5      |
| C(m2)–C(a3)–C(b3)   | 123.57(14) | O(1)–N(3)–Fe(1)    | 145.3(3)   |
| N(2)–C(a4)–C(m1#1)  | 125.79(14) | O(1)–N(3)–Fe(1)#1  | 144.9(2)   |
| N(2)–C(a4)–C(b4)    | 110.31(13) | Fe(1)–N(3)–Fe(1)#1 | 0.5(2)     |
| C(m1#1)–C(a4)–C(b4) | 123.89(14) |                    |            |
| C(b2)–C(b1)–C(a1)   | 107.06(13) |                    |            |

<sup>a</sup>The estimated standard deviations of the least significant digits are given in parentheses.

**Table S17.** Anisotropic Displacement Parameters ( $\text{\AA}^2$ ) for  $[\text{Fe}(\text{TPP})(\text{NO})]$  at 100 K, crystal 2<sup>a</sup>

| atom  | $U_{11}$   | $U_{22}$   | $U_{33}$   | $U_{23}$   | $U_{13}$    | $U_{12}$    |
|-------|------------|------------|------------|------------|-------------|-------------|
| Fe(1) | 0.0188(10) | 0.0152(2)  | 0.0106(2)  | 0.0013(2)  | -0.0028(7)  | -0.0038(7)  |
| N(1)  | 0.0180(7)  | 0.0159(6)  | 0.0124(6)  | -0.0006(5) | -0.0027(5)  | -0.0024(5)  |
| N(2)  | 0.0174(7)  | 0.0181(6)  | 0.0132(6)  | 0.0021(5)  | -0.0042(5)  | -0.0030(5)  |
| C(m1) | 0.0170(8)  | 0.0223(8)  | 0.0133(7)  | 0.0031(6)  | -0.0054(6)  | -0.0067(6)  |
| C(m2) | 0.0144(8)  | 0.0172(7)  | 0.0182(7)  | 0.0013(6)  | -0.0066(6)  | -0.0042(6)  |
| C(a1) | 0.0200(8)  | 0.0178(7)  | 0.0143(7)  | 0.0025(5)  | -0.0056(7)  | -0.0052(6)  |
| C(a2) | 0.0166(8)  | 0.0160(7)  | 0.0168(7)  | 0.0025(5)  | -0.0061(6)  | -0.0038(6)  |
| C(a3) | 0.0167(8)  | 0.0176(7)  | 0.0147(7)  | -0.0009(5) | -0.0044(6)  | -0.0022(6)  |
| C(a4) | 0.0196(8)  | 0.0198(7)  | 0.0111(7)  | -0.0009(5) | -0.0036(6)  | -0.0034(6)  |
| C(b1) | 0.0256(9)  | 0.0192(7)  | 0.0154(7)  | 0.0051(6)  | -0.0066(7)  | -0.0053(7)  |
| C(b2) | 0.0221(8)  | 0.0165(7)  | 0.0173(7)  | 0.0021(6)  | -0.0053(7)  | -0.0030(6)  |
| C(b3) | 0.0234(9)  | 0.0206(8)  | 0.0138(7)  | -0.0009(6) | -0.0034(7)  | -0.0031(7)  |
| C(b4) | 0.0252(9)  | 0.0215(8)  | 0.0119(7)  | -0.0008(6) | -0.0037(7)  | -0.0021(7)  |
| C(10) | 0.0221(8)  | 0.0146(7)  | 0.0128(7)  | 0.0015(5)  | -0.0038(6)  | -0.0025(6)  |
| C(11) | 0.0238(9)  | 0.0320(9)  | 0.0175(8)  | 0.0031(7)  | -0.0075(7)  | -0.0071(7)  |
| C(12) | 0.0257(9)  | 0.0274(9)  | 0.0188(8)  | 0.0029(7)  | -0.0014(7)  | -0.0087(7)  |
| C(13) | 0.0357(10) | 0.0150(7)  | 0.0137(7)  | 0.0020(6)  | -0.0039(7)  | -0.0041(7)  |
| C(14) | 0.0422(11) | 0.0315(10) | 0.0215(9)  | 0.0059(7)  | -0.0184(8)  | -0.0130(8)  |
| C(15) | 0.0293(10) | 0.0349(10) | 0.0209(8)  | 0.0070(7)  | -0.0108(8)  | -0.0164(8)  |
| C(20) | 0.0207(8)  | 0.0177(7)  | 0.0128(7)  | 0.0000(5)  | -0.0054(6)  | -0.0056(6)  |
| C(21) | 0.0229(9)  | 0.0205(8)  | 0.0412(11) | -0.0052(7) | -0.0140(8)  | -0.0056(7)  |
| C(22) | 0.0235(10) | 0.0238(9)  | 0.0415(11) | -0.0075(8) | -0.0126(8)  | 0.0004(7)   |
| C(23) | 0.0334(10) | 0.0173(7)  | 0.0155(7)  | -0.0033(6) | -0.0052(7)  | -0.0037(7)  |
| C(24) | 0.0394(12) | 0.0237(9)  | 0.0402(11) | -0.0066(8) | -0.0131(9)  | -0.0147(8)  |
| C(25) | 0.0213(9)  | 0.0283(10) | 0.0450(11) | -0.0052(8) | -0.0111(9)  | -0.0091(8)  |
| N(3)  | 0.0207(13) | 0.0162(12) | 0.0084(11) | 0.0013(9)  | -0.0030(11) | -0.0047(10) |
| O(1)  | 0.0218(13) | 0.0335(14) | 0.0276(13) | 0.0021(11) | -0.0111(11) | -0.0043(10) |

<sup>a</sup>The estimated standard deviations of the least significant digits are given in parentheses. The anisotropic displacement factor exponent takes the form:  $-2 \pi [\text{h}^2 U_{11} + \dots + 2 \text{h k a}^* \text{b}^* U_{12}]$ .

**Table S18.** Hydrogen Atom Coordinates and Equivalent Isotropic Displacement Parameters ( $\text{\AA}^2$ ) for  $[\text{Fe}(\text{TPP})(\text{NO})]$  at 100 K, crystal 2<sup>a</sup>

| atom   | $x$     | $y$    | $z$     | $U(\text{eq})$ |
|--------|---------|--------|---------|----------------|
| H(BA)  | 0.4980  | 0.8848 | 0.1191  | 0.026          |
| H(BB)  | 0.3168  | 1.0208 | 0.3434  | 0.025          |
| H(BC)  | 0.1281  | 0.8870 | 0.8824  | 0.026          |
| H(BD)  | 0.1693  | 0.6602 | 1.0162  | 0.027          |
| H(11A) | 0.9018  | 0.6348 | -0.0151 | 0.031          |
| H(12A) | 0.9976  | 0.6950 | -0.2541 | 0.032          |
| H(13A) | 0.8462  | 0.7195 | -0.3859 | 0.030          |
| H(14A) | 0.5934  | 0.6957 | -0.2769 | 0.036          |
| H(15A) | 0.4972  | 0.6358 | -0.0376 | 0.032          |
| H(21A) | -0.0258 | 0.9929 | 0.6438  | 0.033          |
| H(22A) | -0.1784 | 1.2330 | 0.7038  | 0.037          |
| H(23A) | -0.0623 | 1.3945 | 0.7216  | 0.030          |
| H(24A) | 0.2068  | 1.3125 | 0.6861  | 0.040          |
| H(25A) | 0.3599  | 1.0734 | 0.6240  | 0.038          |

<sup>a</sup> $U(\text{eq})$  is defined as one third of the trace of the orthogonalized  $\mathbf{U}_{ij}$  tensor the estimated standard deviations of the least significant digits are given in parentheses.

## Supporting Information

**Table S19.** Complete Crystallographic Details for [Fe(TPP)(NO)] at 100 K, crystal 3

|                                                              |                                                                 |
|--------------------------------------------------------------|-----------------------------------------------------------------|
| formula                                                      | C <sub>44</sub> H <sub>28</sub> FeN <sub>5</sub> O              |
| FW, amu                                                      | 698.56                                                          |
| <i>a</i> , Å                                                 | 9.734(3)                                                        |
| <i>b</i> , Å                                                 | 9.960(3)                                                        |
| <i>c</i> , Å                                                 | 10.391(3)                                                       |
| $\alpha$ , deg                                               | 82.100(3)                                                       |
| $\beta$ , deg                                                | 65.63(2)                                                        |
| $\gamma$ , deg                                               | 69.249(19)                                                      |
| <i>V</i> , Å <sup>3</sup>                                    | 858.0(4)                                                        |
| space group                                                  | <i>P</i> $\bar{1}$                                              |
| <i>Z</i>                                                     | 1                                                               |
| D <sub>c</sub> , g/cm <sup>3</sup>                           | 1.352                                                           |
| F(000)                                                       | 361                                                             |
| $\mu$ , mm <sup>-1</sup>                                     | 0.483                                                           |
| crystal dimensions, mm                                       | 0.48 × 0.26 × 0.25                                              |
| radiation                                                    | MoK $\alpha$ , $\bar{\lambda}$ = 0.71073 Å                      |
| temperature, K                                               | 100(2)                                                          |
| diffractometer                                               | Bruker Apex CCD                                                 |
| $\theta$ range for collected data, deg                       | 2.15–26.00                                                      |
| index range                                                  | –10 ≤ <i>h</i> ≤ 11<br>–11 ≤ <i>k</i> ≤ 12<br>0 ≤ <i>l</i> ≤ 12 |
| total data collected                                         | 5092                                                            |
| absorption correction                                        | Semi-empirical fromequiv                                        |
| relative transmission coefficients (I)                       | 0.8888 and 0.8013                                               |
| unique data                                                  | 5092 ( <i>R</i> <sub>int</sub> = 0.0615)                        |
| unique observed data [ <i>I</i> > 2 $\sigma$ ( <i>I</i> )]   | 4085                                                            |
| refinement method                                            | Full-matrix least-squares on <i>F</i> <sup>2</sup>              |
| data/restraints/parameters                                   | 5092/0/247                                                      |
| goodness-of-fit (pased on <i>F</i> <sup>2</sup> )            | 1.035                                                           |
| final <i>R</i> indices [ <i>I</i> > 2 $\sigma$ ( <i>I</i> )] | <i>R</i> <sub>1</sub> = 0.0788, <i>wR</i> <sub>2</sub> = 0.1979 |
| final <i>R</i> indices (all data)                            | <i>R</i> <sub>1</sub> = 0.0999, <i>wR</i> <sub>2</sub> = 0.2225 |

**Table S20.** Atomic Coordinates and Equivalent Isotropic Displacement Parameters ( $\text{\AA}^2$ ) for [Fe(TPP)(NO)] at 100 K, crystal 3<sup>a</sup>

| atom  | <i>x</i>   | <i>y</i>   | <i>z</i>   | <i>U</i> (eq) |
|-------|------------|------------|------------|---------------|
| Fe(1) | 0.4836(12) | 0.4969(15) | 0.4979(15) | 0.0219(11)    |
| N(1)  | 0.4626(3)  | 0.6827(3)  | 0.3929(3)  | 0.0178(6)     |
| N(2)  | 0.3564(3)  | 0.6086(3)  | 0.6810(3)  | 0.0185(6)     |
| C(m1) | 0.6315(4)  | 0.5878(3)  | 0.1505(3)  | 0.0189(7)     |
| C(m2) | 0.2818(4)  | 0.8529(3)  | 0.5878(3)  | 0.0180(6)     |
| C(a1) | 0.5263(4)  | 0.6986(3)  | 0.2480(3)  | 0.0189(7)     |
| C(a2) | 0.3691(4)  | 0.8172(3)  | 0.4461(3)  | 0.0199(7)     |
| C(a3) | 0.2775(4)  | 0.7554(3)  | 0.6976(3)  | 0.0190(7)     |
| C(a4) | 0.3168(4)  | 0.5560(3)  | 0.8149(3)  | 0.0195(7)     |
| C(b1) | 0.4715(4)  | 0.8448(3)  | 0.2121(3)  | 0.0232(7)     |
| C(b2) | 0.3742(4)  | 0.9190(3)  | 0.3329(3)  | 0.0215(7)     |
| C(b3) | 0.1901(4)  | 0.7931(3)  | 0.8433(3)  | 0.0237(7)     |
| C(b4) | 0.2123(4)  | 0.6698(3)  | 0.9160(3)  | 0.0207(7)     |
| C(10) | 0.6911(4)  | 0.6275(3)  | -0.0034(3) | 0.0191(7)     |
| C(11) | 0.8373(4)  | 0.6468(4)  | -0.0676(4) | 0.0301(9)     |
| C(12) | 0.8941(5)  | 0.6824(4)  | -0.2102(4) | 0.0302(9)     |
| C(13) | 0.8047(5)  | 0.6977(3)  | -0.2883(3) | 0.0267(8)     |
| C(14) | 0.6562(5)  | 0.6809(4)  | -0.2231(4) | 0.0336(9)     |
| C(15) | 0.6001(5)  | 0.6454(4)  | -0.0809(4) | 0.0310(9)     |
| C(20) | 0.1830(4)  | 1.0077(3)  | 0.6274(3)  | 0.0196(7)     |
| C(21) | 0.0221(5)  | 1.0590(4)  | 0.6511(4)  | 0.0327(9)     |
| C(22) | -0.0680(5) | 1.2014(4)  | 0.6862(4)  | 0.0349(9)     |
| C(23) | 0.0000(5)  | 1.2953(3)  | 0.6990(3)  | 0.0279(8)     |
| C(24) | 0.1591(5)  | 1.2452(4)  | 0.6777(4)  | 0.0374(10)    |
| C(25) | 0.2505(5)  | 1.1025(4)  | 0.6417(4)  | 0.0349(9)     |
| N(3)  | 0.3115(6)  | 0.4892(6)  | 0.4913(6)  | 0.0186(11)    |
| O(1)  | 0.1803(6)  | 0.5545(6)  | 0.5033(6)  | 0.0338(12)    |

<sup>a</sup> *U*(eq) is defined as one third of the trace of the orthogonalized  $\mathbf{U}_{ij}$  tensor. The estimated standard deviations of the least significant digits are given in parentheses.

**Table S21.** Bond Lengths for [Fe(TPP)(NO)] at 100 K, crystal 3<sup>a</sup>

| bond          | length (Å) | bond         | length (Å) |
|---------------|------------|--------------|------------|
| Fe(1)–Fe(1)#1 | 0.365(13)  | C(b3)–H(b3)  | 0.9500     |
| Fe(1)–N(3)    | 1.734(8)   | C(b4)–H(b4)  | 0.9500     |
| Fe(1)–N(2)#1  | 1.994(14)  | C(10)–C(11)  | 1.372(5)   |
| Fe(1)–N(1)    | 2.004(14)  | C(10)–C(15)  | 1.379(5)   |
| Fe(1)–N(1)#1  | 2.008(14)  | C(11)–C(12)  | 1.394(5)   |
| Fe(1)–N(2)    | 2.013(14)  | C(11)–H(11)  | 0.9500     |
| Fe(1)–N(3)#1  | 2.096(9)   | C(12)–C(13)  | 1.376(5)   |
| N(1)–C(a2)    | 1.361(4)   | C(12)–H(12)  | 0.9500     |
| N(1)–C(a1)    | 1.382(4)   | C(13)–C(14)  | 1.382(6)   |
| N(1)–Fe(1)#1  | 2.008(14)  | C(13)–H(13)  | 0.9500     |
| N(2)–C(a4)    | 1.363(4)   | C(14)–C(15)  | 1.390(5)   |
| N(2)–C(a3)    | 1.386(4)   | C(14)–H(14a) | 0.9500     |
| N(2)–Fe(1)#1  | 1.993(14)  | C(15)–H(15)  | 0.9500     |
| C(m1)–C(a4#1) | 1.390(4)   | C(20)–C(25)  | 1.380(5)   |
| C(m1)–C(a1)   | 1.394(4)   | C(20)–C(21)  | 1.387(5)   |
| C(m1)–C(10)   | 1.508(4)   | C(21)–C(22)  | 1.382(5)   |
| C(m2)–C(a2)   | 1.383(5)   | C(21)–H(21)  | 0.9500     |
| C(m2)–C(a3)   | 1.390(4)   | C(22)–C(23)  | 1.370(6)   |
| C(m2)–C(20)   | 1.506(5)   | C(22)–H(22)  | 0.9500     |
| C(a1)–C(b1)   | 1.417(4)   | C(23)–C(24)  | 1.377(6)   |
| C(a2)–C(b2)   | 1.440(4)   | C(23)–H(23)  | 0.9500     |
| C(a3)–C(b3)   | 1.423(4)   | C(24)–C(25)  | 1.388(6)   |
| C(a4)–C(m1#1) | 1.390(4)   | C(24)–H(24)  | 0.9500     |
| C(a4)–C(b4)   | 1.432(4)   | C(25)–H(25)  | 0.9500     |
| C(b1)–C(b2)   | 1.341(4)   | N(3)–O(1)    | 1.171(7)   |
| C(b1)–H(ba)   | 0.9500     | N(3)–Fe(1)#1 | 2.096(9)   |
| C(b2)–H(bb)   | 0.9500     |              |            |
| C(b3)–C(b4)   | 1.348(5)   |              |            |

<sup>a</sup>The estimated standard deviations of the least significant digits are given in parentheses.



**Table S22.** Bond Angles for [Fe(TPP)(NO)] at 100 K, crystal 3<sup>a</sup>

| angle                | degree   | angle             | degree   |
|----------------------|----------|-------------------|----------|
| Fe(1)#1–Fe(1)–N(3)   | 172(5)   | C(a1)–C(b1)–H(b1) | 126.3    |
| Fe(1)#1–Fe(1)–N(2)#1 | 88(4)    | C(b1)–C(b2)–C(a2) | 106.9(3) |
| N(3)–Fe(1)–N(2)#1    | 99.1(6)  | C(b1)–C(b2)–H(b2) | 126.6    |
| Fe(1)#1–Fe(1)–N(1)   | 85(4)    | C(a2)–C(b2)–H(b2) | 126.6    |
| N(3)–Fe(1)–N(1)      | 91.0(6)  | C(b4)–C(b3)–C(a3) | 106.7(3) |
| N(2)#1–Fe(1)–N(1)    | 90.0(6)  | C(b4)–C(b3)–H(b3) | 126.7    |
| Fe(1)#1–Fe(1)–N(1)#1 | 84(4)    | C(a3)–C(b3)–H(b3) | 126.7    |
| N(3)–Fe(1)–N(1)#1    | 99.3(6)  | C(b3)–C(b4)–C(a4) | 107.3(3) |
| N(2)#1–Fe(1)–N(1)#1  | 89.6(6)  | C(b3)–C(b4)–H(b4) | 126.4    |
| N(1)–Fe(1)–N(1)#1    | 169.6(4) | C(a4)–C(b4)–H(b4) | 126.4    |
| Fe(1)#1–Fe(1)–N(2)   | 82(4)    | C(11)–C(10)–C(15) | 119.3(3) |
| N(3)–Fe(1)–N(2)      | 91.3(6)  | C(11)–C(10)–C(m1) | 119.9(3) |
| N(2)#1–Fe(1)–N(2)    | 169.6(4) | C(15)–C(10)–C(m1) | 120.8(3) |
| N(1)–Fe(1)–N(2)      | 89.2(6)  | C(10)–C(11)–C(12) | 120.3(3) |
| N(1)#1–Fe(1)–N(2)    | 89.3(6)  | C(10)–C(11)–H(11) | 119.8    |
| N(3)–Fe(1)–N(3)#1    | 178.6(9) | C(12)–C(11)–H(11) | 119.8    |
| N(2)#1–Fe(1)–N(3)#1  | 82.1(4)  | C(13)–C(12)–C(11) | 120.4(3) |
| N(1)–Fe(1)–N(3)#1    | 88.3(4)  | C(13)–C(12)–H(12) | 119.8    |
| N(1)#1–Fe(1)–N(3)#1  | 81.3(4)  | C(11)–C(12)–H(12) | 119.8    |
| N(2)–Fe(1)–N(3)#1    | 87.5(4)  | C(12)–C(13)–C(14) | 119.3(3) |
| C(a2)–N(1)–C(a1)     | 105.4(2) | C(12)–C(13)–H(13) | 120.4    |
| C(a2)–N(1)–Fe(1)     | 127.7(5) | C(14)–C(13)–H(13) | 120.4    |
| C(a1)–N(1)–Fe(1)     | 126.4(4) | C(13)–C(14)–C(15) | 120.1(4) |
| C(a2)–N(1)–Fe(1)#1   | 127.2(5) | C(13)–C(14)–H(14) | 120.0    |
| C(a1)–N(1)–Fe(1)#1   | 127.0(5) | C(15)–C(14)–H(14) | 120.0    |
| C(a4)–N(2)–C(a3)     | 105.0(2) | C(10)–C(15)–C(14) | 120.6(4) |
| C(a4)–N(2)–Fe(1)#1   | 127.6(4) | C(10)–C(15)–H(15) | 119.7    |
| C(a3)–N(2)–Fe(1)#1   | 126.9(5) | C(14)–C(15)–H(15) | 119.7    |
| C(a4)–N(2)–Fe(1)     | 127.8(5) | C(25)–C(20)–C(21) | 118.1(3) |
| C(a3)–N(2)–Fe(1)     | 127.0(4) | C(25)–C(20)–C(m2) | 120.6(3) |
| C(a4#1)–C(m1)–C(a1)  | 124.7(3) | C(21)–C(20)–C(m2) | 121.3(3) |
| C(a4#1)–C(m1)–C(10)  | 118.0(3) | C(22)–C(21)–C(20) | 121.2(3) |
| C(a1)–C(m1)–C(10)    | 117.3(3) | C(22)–C(21)–H(21) | 119.4    |
| C(a2)–C(m2)–C(a3)    | 124.5(3) | C(20)–C(21)–H(21) | 119.4    |

**Table S22.** Continued

| angle               | degree   | angle             | degree   |
|---------------------|----------|-------------------|----------|
| C(a2)–C(m2)–C(20)   | 118.4(3) | C(23)–C(22)–C(21) | 120.5(4) |
| C(a3)–C(m2)–C(20)   | 117.1(3) | C(23)–C(22)–H(22) | 119.8    |
| N(1)–C(a1)–C(m1)    | 125.2(3) | C(21)–C(22)–H(22) | 119.8    |
| N(1)–C(a1)–C(b1)    | 110.3(3) | C(22)–C(23)–C(24) | 118.9(3) |
| C(m1)–C(a1)–C(b1)   | 124.5(3) | C(22)–C(23)–H(23) | 120.5    |
| N(1)–C(a2)–C(m2)    | 125.7(3) | C(24)–C(23)–H(23) | 120.5    |
| N(1)–C(a2)–C(b2)    | 110.1(3) | C(23)–C(24)–C(25) | 120.9(4) |
| C(m2)–C(a2)–C(b2)   | 124.2(3) | C(23)–C(24)–H(24) | 119.5    |
| N(2)–C(a3)–C(m2)    | 125.1(3) | C(25)–C(24)–H(24) | 119.5    |
| N(2)–C(a3)–C(b3)    | 110.6(3) | C(20)–C(25)–C(24) | 120.4(4) |
| C(m2)–C(a3)–C(b3)   | 124.4(3) | C(20)–C(25)–H(25) | 119.8    |
| N(2)–C(a4)–C(m1#1)  | 125.1(3) | C(24)–C(25)–H(25) | 119.8    |
| N(2)–C(a4)–C(b4)    | 110.5(3) | O(1)–N(3)–Fe(1)   | 145.4(7) |
| C(m1#1)–C(a4)–C(b4) | 124.4(3) | O(1)–N(3)–Fe(1)#1 | 144.1(6) |
| C(b2)–C(b1)–C(a1)   | 107.4(3) |                   |          |
| C(b2)–C(b1)–H(ba)   | 126.3    |                   |          |

<sup>a</sup>The estimated standard deviations of the least significant digits are given in parentheses.

**Table S23.** Anisotropic Displacement Parameters ( $\text{\AA}^2$ ) for  $[\text{Fe}(\text{TPP})(\text{NO})]$  at 100 K, crystal 3<sup>a</sup>

| atom  | $U_{11}$   | $U_{22}$   | $U_{33}$   | $U_{23}$    | $U_{13}$    | $U_{12}$    |
|-------|------------|------------|------------|-------------|-------------|-------------|
| Fe(1) | 0.029(3)   | 0.0168(10) | 0.0125(7)  | 0.0027(6)   | -0.005(2)   | -0.004(2)   |
| N(1)  | 0.0186(15) | 0.0208(14) | 0.0120(12) | 0.0039(10)  | -0.0053(11) | -0.0063(12) |
| N(2)  | 0.0164(15) | 0.0178(13) | 0.0173(13) | 0.0024(10)  | -0.0060(12) | -0.0025(11) |
| C(m1) | 0.0159(17) | 0.0253(17) | 0.0134(15) | 0.0014(12)  | -0.0055(13) | -0.0051(14) |
| C(m2) | 0.0202(18) | 0.0175(15) | 0.0201(16) | 0.0047(12)  | -0.0105(14) | -0.0091(13) |
| C(a1) | 0.0189(18) | 0.0212(16) | 0.0133(15) | 0.0011(12)  | -0.0054(14) | -0.0042(14) |
| C(a2) | 0.0188(18) | 0.0173(16) | 0.0230(17) | 0.0070(12)  | -0.0092(14) | -0.0068(14) |
| C(a3) | 0.0186(18) | 0.0189(16) | 0.0205(16) | 0.0063(12)  | -0.0103(14) | -0.0064(14) |
| C(a4) | 0.0177(17) | 0.0259(17) | 0.0103(14) | -0.0037(12) | -0.0011(13) | -0.0058(14) |
| C(b1) | 0.028(2)   | 0.0207(16) | 0.0153(15) | 0.0050(12)  | -0.0070(15) | -0.0051(15) |
| C(b2) | 0.029(2)   | 0.0153(15) | 0.0173(16) | 0.0056(12)  | -0.0089(15) | -0.0061(14) |
| C(b3) | 0.0252(19) | 0.0218(17) | 0.0195(16) | 0.0002(13)  | -0.0066(15) | -0.0051(15) |
| C(b4) | 0.0235(18) | 0.0220(16) | 0.0089(14) | -0.0020(12) | -0.0040(13) | -0.0011(14) |
| C(10) | 0.0231(18) | 0.0136(15) | 0.0162(15) | 0.0009(11)  | -0.0066(14) | -0.0027(13) |
| C(11) | 0.028(2)   | 0.040(2)   | 0.0216(19) | 0.0030(16)  | -0.0097(16) | -0.0115(17) |
| C(12) | 0.028(2)   | 0.034(2)   | 0.0220(19) | 0.0037(16)  | -0.0011(15) | -0.0140(16) |
| C(13) | 0.039(2)   | 0.0154(16) | 0.0155(16) | -0.0016(12) | -0.0042(16) | -0.0043(15) |
| C(14) | 0.046(2)   | 0.035(2)   | 0.026(2)   | 0.0081(17)  | -0.0210(19) | -0.0149(19) |
| C(15) | 0.034(2)   | 0.041(2)   | 0.023(2)   | 0.0091(16)  | -0.0135(17) | -0.0191(18) |
| C(20) | 0.0228(19) | 0.0233(16) | 0.0103(14) | 0.0036(12)  | -0.0047(14) | -0.0083(14) |
| C(21) | 0.027(2)   | 0.0252(19) | 0.049(2)   | -0.0033(17) | -0.0192(19) | -0.0060(16) |
| C(22) | 0.026(2)   | 0.030(2)   | 0.044(2)   | -0.0053(18) | -0.0145(19) | -0.0008(17) |
| C(23) | 0.041(2)   | 0.0190(16) | 0.0133(16) | 0.0027(13)  | -0.0061(16) | -0.0047(16) |
| C(24) | 0.043(3)   | 0.028(2)   | 0.043(2)   | -0.0045(18) | -0.014(2)   | -0.0155(18) |
| C(25) | 0.026(2)   | 0.030(2)   | 0.049(3)   | -0.0026(18) | -0.0137(19) | -0.0094(17) |
| N(3)  | 0.018(3)   | 0.023(3)   | 0.010(2)   | 0.006(2)    | -0.004(2)   | -0.006(2)   |
| O(1)  | 0.026(3)   | 0.039(3)   | 0.035(3)   | 0.004(2)    | -0.015(2)   | -0.007(2)   |

<sup>a</sup>The estimated standard deviations of the least significant digits are given in parentheses. The anisotropic displacement factor exponent takes the form:  $-2 \pi [\text{h}^2 U_{11} + \dots + 2 \text{h k a}^* \text{b}^* U_{12}]$ .

**Table S24.** Hydrogen Atom Coordinates and Equivalent Isotropic Displacement Parameters ( $\text{\AA}^2$ ) for  $[\text{Fe}(\text{TPP})(\text{NO})]$  at 100 K, crystal 3<sup>a</sup>

| atom  | $x$     | $y$    | $z$     | $U(\text{eq})$ |
|-------|---------|--------|---------|----------------|
| H(b1) | 0.4986  | 0.8831 | 0.1195  | 0.028          |
| H(b2) | 0.3192  | 1.0195 | 0.3421  | 0.026          |
| H(b3) | 0.1281  | 0.8869 | 0.8819  | 0.028          |
| H(b4) | 0.1671  | 0.6601 | 1.0157  | 0.025          |
| H(11) | 0.9001  | 0.6360 | -0.0147 | 0.036          |
| H(12) | 0.9952  | 0.6961 | -0.2537 | 0.036          |
| H(13) | 0.8447  | 0.7196 | -0.3860 | 0.032          |
| H(14) | 0.5923  | 0.6937 | -0.2754 | 0.040          |
| H(15) | 0.4982  | 0.6333 | -0.0368 | 0.037          |
| H(21) | -0.0270 | 0.9952 | 0.6431  | 0.039          |
| H(22) | -0.1780 | 1.2344 | 0.7016  | 0.042          |
| H(23) | -0.0616 | 1.3934 | 0.7222  | 0.033          |
| H(24) | 0.2069  | 1.3091 | 0.6878  | 0.045          |
| H(25) | 0.3603  | 1.0699 | 0.6268  | 0.042          |

<sup>a</sup> $U(\text{eq})$  is defined as one third of the trace of the orthogonalized  $\mathbf{U}_{ij}$  tensor the estimated standard deviations of the least significant digits are given in parentheses.

## Supporting Information

**Table S25.** Complete Crystallographic Details for [Fe(TPP)(NO)] at 100 K, crystal 4

|                                                              |                                                                 |
|--------------------------------------------------------------|-----------------------------------------------------------------|
| formula                                                      | C <sub>44</sub> H <sub>28</sub> FeN <sub>5</sub> O              |
| FW, amu                                                      | 698.56                                                          |
| <i>a</i> , Å                                                 | 9.7201(7)                                                       |
| <i>b</i> , Å                                                 | 9.9105(6)                                                       |
| <i>c</i> , Å                                                 | 10.3715(6)                                                      |
| $\alpha$ , deg                                               | 82.304(4)                                                       |
| $\beta$ , deg                                                | 65.802(4)                                                       |
| $\gamma$ , deg                                               | 69.546(4)                                                       |
| <i>V</i> , Å <sup>3</sup>                                    | 853.81(9)                                                       |
| space group                                                  | <i>P</i> $\bar{1}$                                              |
| <i>Z</i>                                                     | 1                                                               |
| D <sub>c</sub> , g/cm <sup>3</sup>                           | 1.359                                                           |
| F(000)                                                       | 361                                                             |
| $\mu$ , mm <sup>-1</sup>                                     | 0.485                                                           |
| crystal dimensions, mm                                       | 0.28 × 0.28 × 0.28                                              |
| radiation                                                    | MoK $\alpha$ , $\bar{\lambda}$ = 0.71073 Å                      |
| temperature, K                                               | 100(2)                                                          |
| diffractometer                                               | Bruker Apex CCD                                                 |
| $\theta$ range for collected data, deg                       | 2.15–34.57                                                      |
| index range                                                  | –13 ≤ <i>h</i> ≤ 15<br>–15 ≤ <i>k</i> ≤ 15<br>0 ≤ <i>l</i> ≤ 16 |
| total data collected                                         | 6741                                                            |
| absorption correction                                        | Semi-empirical fromequiv                                        |
| relative transmission coefficients (I)                       | 0.90 and 0.86                                                   |
| unique data                                                  | 6741 ( <i>R</i> <sub>int</sub> = 0.0854)                        |
| unique observed data [ <i>I</i> > 2 $\sigma$ ( <i>I</i> )]   | 4480                                                            |
| refinement method                                            | Full-matrix least-squares on <i>F</i> <sup>2</sup>              |
| data/restraints/parameters                                   | 6741/0/247                                                      |
| goodness-of-fit (pased on <i>F</i> <sup>2</sup> )            | 1.050                                                           |
| final <i>R</i> indices [ <i>I</i> > 2 $\sigma$ ( <i>I</i> )] | <i>R</i> <sub>1</sub> = 0.0638, <i>wR</i> <sub>2</sub> = 0.1543 |
| final <i>R</i> indices (all data)                            | <i>R</i> <sub>1</sub> = 0.1118, <i>wR</i> <sub>2</sub> = 0.1806 |

**Table S26.** Atomic Coordinates and Equivalent Isotropic Displacement Parameters ( $\text{\AA}^2$ ) for [Fe(TPP)(NO)] at 100 K, crystal 4<sup>a</sup>

| atom  | <i>x</i>   | <i>y</i>   | <i>z</i>    | <i>U</i> (eq) |
|-------|------------|------------|-------------|---------------|
| Fe(1) | −0.0205(2) | 0.4985(3)  | 0.9982(3)   | 0.0166(2)     |
| N(1)  | 0.0362(3)  | 0.3189(2)  | 1.10761(19) | 0.0176(3)     |
| N(2)  | 0.1431(2)  | 0.3907(2)  | 0.82052(19) | 0.0186(4)     |
| N(3)  | −0.1906(4) | 0.4897(4)  | 0.9906(4)   | 0.0208(7)     |
| O(1)  | −0.3201(4) | 0.5556(5)  | 1.0025(5)   | 0.0332(9)     |
| C(a1) | −0.0271(3) | 0.3022(2)  | 1.2526(2)   | 0.0191(4)     |
| C(b1) | 0.0289(3)  | 0.1535(2)  | 1.2885(2)   | 0.0232(4)     |
| C(b2) | 0.1267(3)  | 0.0802(3)  | 1.1669(2)   | 0.0224(4)     |
| C(a2) | 0.1307(3)  | 0.1824(2)  | 1.0541(2)   | 0.0183(4)     |
| C(m1) | 0.2192(3)  | 0.1448(2)  | 0.9121(2)   | 0.0188(4)     |
| C(a3) | 0.2215(3)  | 0.2451(3)  | 0.8039(2)   | 0.0198(4)     |
| C(b3) | 0.3103(3)  | 0.2059(3)  | 0.6561(2)   | 0.0227(4)     |
| C(b4) | 0.2872(3)  | 0.3305(3)  | 0.5833(2)   | 0.0235(5)     |
| C(a4) | 0.1841(3)  | 0.4445(2)  | 0.6848(2)   | 0.0193(4)     |
| C(m2) | 0.1308(3)  | 0.5888(2)  | 0.6495(2)   | 0.0186(4)     |
| C(10) | 0.3166(3)  | −0.0085(2) | 0.8726(2)   | 0.0187(4)     |
| C(11) | 0.4770(3)  | −0.0572(3) | 0.8489(3)   | 0.0297(6)     |
| C(12) | 0.5680(3)  | −0.2003(3) | 0.8133(3)   | 0.0325(6)     |
| C(13) | 0.5005(4)  | −0.2961(2) | 0.8005(2)   | 0.0259(5)     |
| C(14) | 0.3407(4)  | −0.2480(3) | 0.8234(4)   | 0.0360(6)     |
| C(15) | 0.2493(4)  | −0.1054(3) | 0.8601(4)   | 0.0335(6)     |
| C(20) | 0.1917(3)  | 0.6275(2)  | 0.4957(2)   | 0.0199(4)     |
| C(21) | 0.3392(3)  | 0.6466(3)  | 0.4317(3)   | 0.0276(5)     |
| C(22) | 0.3961(3)  | 0.6821(3)  | 0.2892(3)   | 0.0294(6)     |
| C(23) | 0.3062(3)  | 0.6979(3)  | 0.2114(2)   | 0.0264(5)     |
| C(24) | 0.1577(4)  | 0.6816(3)  | 0.2752(3)   | 0.0330(6)     |
| C(25) | 0.1006(3)  | 0.6461(3)  | 0.4176(3)   | 0.0295(6)     |

<sup>a</sup> *U*(eq) is defined as one third of the trace of the orthogonalized  $\mathbf{U}_{ij}$  tensor. The estimated standard deviations of the least significant digits are given in parentheses.

**Table S27.** Bond Lengths for [Fe(TPP)(NO)] at 100 K, crystal 4<sup>a</sup>

| bond          | length (Å) | bond          | length (Å) |
|---------------|------------|---------------|------------|
| Fe(1)–Fe(1)#1 | 0.4272(16) | C(b4)–H(b4)   | 0.9500     |
| Fe(1)–N(3)    | 1.720(4)   | C(a4)–C(m2)   | 1.394(3)   |
| Fe(1)–N(1)#1  | 1.979(3)   | C(m2)–C(a1#1) | 1.381(3)   |
| Fe(1)–N(2)#1  | 1.990(3)   | C(m2)–C(20)   | 1.504(3)   |
| Fe(1)–N(2)    | 2.001(3)   | C(10)–C(15)   | 1.381(4)   |
| Fe(1)–N(1)    | 2.011(3)   | C(10)–C(11)   | 1.383(4)   |
| Fe(1)–N(3)#1  | 2.146(4)   | C(11)–C(12)   | 1.388(4)   |
| N(1)–C(a2)    | 1.377(3)   | C(11)–H(11)   | 0.9500     |
| N(1)–C(a1)    | 1.384(3)   | C(12)–C(13)   | 1.376(4)   |
| N(1)–Fe(1)#1  | 1.979(3)   | C(12)–H(12)   | 0.9500     |
| N(2)–C(a3)    | 1.372(3)   | C(13)–C(14)   | 1.381(4)   |
| N(2)–C(a4)    | 1.383(3)   | C(13)–H(13)   | 0.9500     |
| N(2)–Fe(1)#1  | 1.990(3)   | C(14)–C(15)   | 1.386(4)   |
| N(3)–O(1)     | 1.160(5)   | C(14)–H(14)   | 0.9500     |
| N(3)–Fe(1)#1  | 2.146(4)   | C(15)–H(15)   | 0.9500     |
| C(a1)–C(m2#1) | 1.381(3)   | C(20)–C(25)   | 1.381(4)   |
| C(a1)–C(b1)   | 1.437(3)   | C(20)–C(21)   | 1.382(4)   |
| C(b1)–C(b2)   | 1.343(3)   | C(21)–C(22)   | 1.393(4)   |
| C(b1)–H(b1)   | 0.9500     | C(21)–H(21)   | 0.9500     |
| C(b2)–C(a2)   | 1.439(3)   | C(22)–C(23)   | 1.373(4)   |
| C(b2)–H(b2)   | 0.9500     | C(22)–H(22)   | 0.9500     |
| C(a2)–C(m1)   | 1.389(3)   | C(23)–C(24)   | 1.379(4)   |
| C(m1)–C(a3)   | 1.395(3)   | C(23)–H(23)   | 0.9500     |
| C(m1)–C(10)   | 1.489(3)   | C(24)–C(25)   | 1.393(4)   |
| C(a3)–C(b3)   | 1.444(3)   | C(24)–H(24)   | 0.9500     |
| C(b3)–C(b4)   | 1.357(3)   | C(25)–H(25)   | 0.9500     |
| C(b3)–H(b3)   | 0.9500     |               |            |
| C(b4)–C(a4)   | 1.433(3)   |               |            |

<sup>a</sup>The estimated standard deviations of the least significant digits are given in parentheses.

**Table S28.** Bond Angles for [Fe(TPP)(NO)] at 100 K, crystal 4<sup>a</sup>

| angle                | degree     | angle               | degree     |
|----------------------|------------|---------------------|------------|
| Fe(1)#1–Fe(1)–N(3)   | 177.7(9)   | N(2)–C(a3)–C(b3)    | 110.95(18) |
| Fe(1)#1–Fe(1)–N(1)#1 | 88.2(8)    | C(m1)–C(a3)–C(b3)   | 122.9(2)   |
| N(3)–Fe(1)–N(1)#1    | 91.98(18)  | C(b4)–C(b3)–C(a3)   | 106.2(2)   |
| Fe(1)#1–Fe(1)–N(2)#1 | 85.3(8)    | C(b4)–C(b3)–H(b3)   | 126.9      |
| N(3)–Fe(1)–N(2)#1    | 92.37(19)  | C(a3)–C(b3)–H(b3)   | 126.9      |
| N(1)#1–Fe(1)–N(2)#1  | 89.91(15)  | C(b3)–C(b4)–C(a4)   | 107.2(2)   |
| Fe(1)#1–Fe(1)–N(2)   | 82.4(7)    | C(b3)–C(b4)–H(b4)   | 126.4      |
| N(3)–Fe(1)–N(2)      | 99.92(19)  | C(a4)–C(b4)–H(b4)   | 126.4      |
| N(1)#1–Fe(1)–N(2)    | 89.70(15)  | N(2)–C(a4)–C(m2)    | 125.4(2)   |
| N(2)#1–Fe(1)–N(2)    | 167.72(5)  | N(2)–C(a4)–C(b4)    | 110.55(19) |
| Fe(1)#1–Fe(1)–N(1)   | 79.6(8)    | C(m2)–C(a4)–C(b4)   | 124.0(2)   |
| N(3)–Fe(1)–N(1)      | 100.27(19) | C(a1#1)–C(m2)–C(a4) | 123.9(2)   |
| N(1)#1–Fe(1)–N(1)    | 167.74(5)  | C(a1#1)–C(m2)–C(20) | 118.3(2)   |
| N(2)#1–Fe(1)–N(1)    | 89.10(14)  | C(a4)–C(m2)–C(20)   | 117.8(2)   |
| N(2)–Fe(1)–N(1)      | 88.69(14)  | C(15)–C(10)–C(11)   | 118.6(2)   |
| Fe(1)#1–Fe(1)–N(3)#1 | 1.9(7)     | C(15)–C(10)–C(m1)   | 121.0(2)   |
| N(3)–Fe(1)–N(3)#1    | 179.54(18) | C(11)–C(10)–C(m1)   | 120.4(2)   |
| N(1)#1–Fe(1)–N(3)#1  | 88.05(15)  | C(10)–C(11)–C(12)   | 120.6(2)   |
| N(2)#1–Fe(1)–N(3)#1  | 87.17(15)  | C(10)–C(11)–H(11)   | 119.7      |
| N(2)–Fe(1)–N(3)#1    | 80.55(14)  | C(12)–C(11)–H(11)   | 119.7      |
| N(1)–Fe(1)–N(3)#1    | 79.70(14)  | C(13)–C(12)–C(11)   | 120.5(3)   |
| C(a2)–N(1)–C(a1)     | 104.99(18) | C(13)–C(12)–H(12)   | 119.7      |
| C(a2)–N(1)–Fe(1)#1   | 126.99(17) | C(11)–C(12)–H(12)   | 119.7      |
| C(a1)–N(1)–Fe(1)#1   | 127.47(18) | C(12)–C(13)–C(14)   | 119.1(2)   |
| C(a2)–N(1)–Fe(1)     | 127.35(17) | C(12)–C(13)–H(13)   | 120.5      |
| C(a1)–N(1)–Fe(1)     | 127.21(17) | C(14)–C(13)–H(13)   | 120.5      |
| Fe(1)#1–N(1)–Fe(1)   | 12.26(5)   | C(13)–C(14)–C(15)   | 120.4(3)   |
| C(a3)–N(2)–C(a4)     | 105.00(18) | C(13)–C(14)–H(14)   | 119.8      |
| C(a3)–N(2)–Fe(1)#1   | 126.90(16) | C(15)–C(14)–H(14)   | 119.8      |
| C(a4)–N(2)–Fe(1)#1   | 127.68(18) | C(10)–C(15)–C(14)   | 120.7(3)   |
| C(a3)–N(2)–Fe(1)     | 127.63(16) | C(10)–C(15)–H(15)   | 119.6      |
| C(a4)–N(2)–Fe(1)     | 126.79(18) | C(14)–C(15)–H(15)   | 119.6      |
| Fe(1)#1–N(2)–Fe(1)   | 12.28(5)   | C(25)–C(20)–C(21)   | 119.3(2)   |
| O(1)–N(3)–Fe(1)      | 144.5(4)   | C(25)–C(20)–C(m2)   | 120.7(2)   |



**Table S28.** Continued

| angle               | degree     | angle             | degree   |
|---------------------|------------|-------------------|----------|
| O(1)–N(3)–Fe(1)#1   | 144.2(4)   | C(21)–C(20)–C(m2) | 120.0(2) |
| Fe(1)–N(3)–Fe(1)#1  | 0.46(18)   | C(20)–C(21)–C(22) | 120.1(3) |
| C(m2#1)–C(a1)–N(1)  | 125.6(2)   | C(20)–C(21)–H(21) | 119.9    |
| C(m2#1)–C(a1)–C(b1) | 124.1(2)   | C(22)–C(21)–H(21) | 119.9    |
| N(1)–C(a1)–C(b1)    | 110.3(2)   | C(23)–C(22)–C(21) | 120.3(3) |
| C(b2)–C(b1)–C(a1)   | 107.09(19) | C(23)–C(22)–H(22) | 119.9    |
| C(b2)–C(b1)–H(b1)   | 126.5      | C(21)–C(22)–H(22) | 119.9    |
| C(a1)–C(b1)–H(b1)   | 126.5      | C(22)–C(23)–C(24) | 119.9(2) |
| C(b1)–C(b2)–C(a2)   | 107.2(2)   | C(22)–C(23)–H(23) | 120.0    |
| C(b1)–C(b2)–H(b2)   | 126.4      | C(24)–C(23)–H(23) | 120.0    |
| C(a2)–C(b2)–H(b2)   | 126.4      | C(23)–C(24)–C(25) | 119.9(3) |
| N(1)–C(a2)–C(m1)    | 126.2(2)   | C(23)–C(24)–H(24) | 120.1    |
| N(1)–C(a2)–C(b2)    | 110.40(19) | C(25)–C(24)–H(24) | 120.1    |
| C(m1)–C(a2)–C(b2)   | 123.4(2)   | C(20)–C(25)–C(24) | 120.4(3) |
| C(a2)–C(m1)–C(a3)   | 122.7(2)   | C(20)–C(25)–H(25) | 119.8    |
| C(a2)–C(m1)–C(10)   | 119.18(19) | C(24)–C(25)–H(25) | 119.8    |
| C(a3)–C(m1)–C(10)   | 118.1(2)   |                   |          |
| N(2)–C(a3)–C(m1)    | 126.2(2)   |                   |          |

<sup>a</sup>The estimated standard deviations of the least significant digits are given in parentheses.

**Table S29.** Anisotropic Displacement Parameters ( $\text{\AA}^2$ ) for  $[\text{Fe}(\text{TPP})(\text{NO})]$  at 100 K, crystal 4<sup>a</sup>

| atom  | $U_{11}$   | $U_{22}$   | $U_{33}$   | $U_{23}$    | $U_{13}$    | $U_{12}$    |
|-------|------------|------------|------------|-------------|-------------|-------------|
| Fe(1) | 0.0193(9)  | 0.0174(3)  | 0.0122(3)  | 0.0030(2)   | -0.0065(6)  | -0.0054(7)  |
| N(1)  | 0.0192(9)  | 0.0171(8)  | 0.0128(7)  | 0.0025(6)   | -0.0053(7)  | -0.0036(7)  |
| N(2)  | 0.0201(10) | 0.0194(8)  | 0.0123(8)  | 0.0040(6)   | -0.0051(7)  | -0.0046(8)  |
| N(3)  | 0.0226(17) | 0.024(2)   | 0.0151(16) | 0.0040(14)  | -0.0070(15) | -0.0086(15) |
| O(1)  | 0.0235(18) | 0.039(2)   | 0.035(2)   | 0.0023(17)  | -0.0148(17) | -0.0041(16) |
| C(a1) | 0.0220(11) | 0.0197(10) | 0.0143(9)  | 0.0042(7)   | -0.0071(9)  | -0.0067(9)  |
| C(b1) | 0.0263(12) | 0.0198(10) | 0.0179(10) | 0.0050(8)   | -0.0073(9)  | -0.0045(9)  |
| C(b2) | 0.0249(12) | 0.0197(10) | 0.0180(10) | 0.0029(8)   | -0.0077(9)  | -0.0038(9)  |
| C(a2) | 0.0189(11) | 0.0178(9)  | 0.0151(9)  | 0.0028(7)   | -0.0065(8)  | -0.0034(8)  |
| C(m1) | 0.0187(10) | 0.0189(9)  | 0.0181(9)  | 0.0035(7)   | -0.0088(9)  | -0.0047(8)  |
| C(a3) | 0.0201(11) | 0.0206(10) | 0.0170(9)  | 0.0018(8)   | -0.0075(9)  | -0.0050(9)  |
| C(b3) | 0.0257(12) | 0.0202(10) | 0.0170(9)  | 0.0018(8)   | -0.0063(9)  | -0.0044(9)  |
| C(b4) | 0.0258(12) | 0.0234(11) | 0.0146(9)  | 0.0007(8)   | -0.0062(9)  | -0.0025(10) |
| C(a4) | 0.0213(11) | 0.0222(10) | 0.0130(9)  | 0.0023(7)   | -0.0067(8)  | -0.0063(9)  |
| C(m2) | 0.0193(10) | 0.0216(10) | 0.0133(8)  | 0.0045(7)   | -0.0068(8)  | -0.0059(8)  |
| C(10) | 0.0207(11) | 0.0171(9)  | 0.0167(9)  | 0.0012(7)   | -0.0065(8)  | -0.0056(8)  |
| C(11) | 0.0249(12) | 0.0195(11) | 0.0469(16) | -0.0062(11) | -0.0165(12) | -0.0043(10) |
| C(12) | 0.0257(13) | 0.0228(12) | 0.0456(17) | -0.0056(11) | -0.0152(12) | -0.0003(10) |
| C(13) | 0.0361(14) | 0.0175(9)  | 0.0176(9)  | -0.0022(7)  | -0.0068(10) | -0.0049(10) |
| C(14) | 0.0407(16) | 0.0270(14) | 0.0459(17) | -0.0054(12) | -0.0170(14) | -0.0154(12) |
| C(15) | 0.0231(12) | 0.0305(14) | 0.0485(17) | -0.0055(12) | -0.0125(12) | -0.0103(11) |
| C(20) | 0.0258(12) | 0.0179(9)  | 0.0131(8)  | 0.0023(7)   | -0.0070(8)  | -0.0054(9)  |
| C(21) | 0.0245(12) | 0.0397(15) | 0.0186(11) | 0.0054(10)  | -0.0084(9)  | -0.0124(11) |
| C(22) | 0.0282(12) | 0.0347(14) | 0.0208(11) | 0.0046(10)  | -0.0043(10) | -0.0130(11) |
| C(23) | 0.0387(14) | 0.0190(10) | 0.0134(9)  | 0.0043(7)   | -0.0054(10) | -0.0073(10) |
| C(24) | 0.0445(16) | 0.0391(15) | 0.0231(12) | 0.0084(11)  | -0.0210(12) | -0.0161(13) |
| C(25) | 0.0316(13) | 0.0408(15) | 0.0238(12) | 0.0106(11)  | -0.0154(11) | -0.0190(12) |

<sup>a</sup>The estimated standard deviations of the least significant digits are given in parentheses. The anisotropic displacement factor exponent takes the form:  $-2 \pi [\text{h}^2 U_{11} + \dots + 2 \text{h k a}^* \text{b}^* U_{12}]$ .

**Table S30.** Hydrogen Atom Coordinates and Equivalent Isotropic Displacement Parameters ( $\text{\AA}^2$ ) for  $[\text{Fe}(\text{TPP})(\text{NO})]$  at 100 K, crystal 4<sup>a</sup>

| atom  | $x$     | $y$     | $z$    | $U(\text{eq})$ |
|-------|---------|---------|--------|----------------|
| H(b1) | 0.0019  | 0.1144  | 1.3809 | 0.028          |
| H(b2) | 0.1828  | -0.0203 | 1.1571 | 0.027          |
| H(b3) | 0.3723  | 0.1118  | 0.6177 | 0.027          |
| H(b4) | 0.3312  | 0.3402  | 0.4835 | 0.028          |
| H(11) | 0.5252  | 0.0079  | 0.8569 | 0.036          |
| H(12) | 0.6779  | -0.2324 | 0.7978 | 0.039          |
| H(13) | 0.5629  | -0.3941 | 0.7762 | 0.031          |
| H(14) | 0.2931  | -0.3131 | 0.8139 | 0.043          |
| H(15) | 0.1392  | -0.0739 | 0.8768 | 0.040          |
| H(21) | 0.4019  | 0.6356  | 0.4849 | 0.033          |
| H(22) | 0.4975  | 0.6953  | 0.2456 | 0.035          |
| H(23) | 0.3464  | 0.7202  | 0.1138 | 0.032          |
| H(24) | 0.0944  | 0.6945  | 0.2220 | 0.040          |
| H(25) | -0.0017 | 0.6345  | 0.4614 | 0.035          |

<sup>a</sup> $U(\text{eq})$  is defined as one third of the trace of the orthogonalized  $\mathbf{U}_{ij}$  tensor the estimated standard deviations of the least significant digits are given in parentheses.

## Supporting Information

**Table S31.** Complete Crystallographic Details for [Fe(TPP)(NO)] at 130 K, crystal 4

|                                                              |                                                                 |
|--------------------------------------------------------------|-----------------------------------------------------------------|
| formula                                                      | C <sub>44</sub> H <sub>28</sub> FeN <sub>5</sub> O              |
| FW, amu                                                      | 698.56                                                          |
| <i>a</i> , Å                                                 | 9.7394(10)                                                      |
| <i>b</i> , Å                                                 | 9.9634(10)                                                      |
| <i>c</i> , Å                                                 | 10.3998(10)                                                     |
| $\alpha$ , deg                                               | 82.078(4)                                                       |
| $\beta$ , deg                                                | 65.661(4)                                                       |
| $\gamma$ , deg                                               | 69.225(4)                                                       |
| <i>V</i> , Å <sup>3</sup>                                    | 859.65(15)                                                      |
| space group                                                  | <i>P</i> $\bar{1}$                                              |
| <i>Z</i>                                                     | 1                                                               |
| D <sub>c</sub> , g/cm <sup>3</sup>                           | 1.349                                                           |
| F(000)                                                       | 361                                                             |
| $\mu$ , mm <sup>-1</sup>                                     | 0.482                                                           |
| crystal dimensions, mm                                       | 0.28 × 0.28 × 0.28                                              |
| radiation                                                    | MoK $\alpha$ , $\bar{\lambda}$ = 0.71073 Å                      |
| temperature, K                                               | 128(2)                                                          |
| diffractometer                                               | Bruker Apex CCD                                                 |
| $\theta$ range for collected data, deg                       | 2.15–28.22                                                      |
| index range                                                  | –11 ≤ <i>h</i> ≤ 12<br>–12 ≤ <i>k</i> ≤ 13<br>0 ≤ <i>l</i> ≤ 13 |
| total data collected                                         | 4103                                                            |
| absorption correction                                        | Semi-empirical fromequiv                                        |
| relative transmission coefficients (I)                       | 0.90 and 0.86                                                   |
| unique data                                                  | 4103 ( <i>R</i> <sub>int</sub> = 0.0749)                        |
| unique observed data [ <i>I</i> > 2 $\sigma$ ( <i>I</i> )]   | 3204                                                            |
| refinement method                                            | Full-matrix least-squares on <i>F</i> <sup>2</sup>              |
| data/restraints/parameters                                   | 4103/0/247                                                      |
| goodness-of-fit (pased on <i>F</i> <sup>2</sup> )            | 1.053                                                           |
| final <i>R</i> indices [ <i>I</i> > 2 $\sigma$ ( <i>I</i> )] | <i>R</i> <sub>1</sub> = 0.0537, <i>wR</i> <sub>2</sub> = 0.1354 |
| final <i>R</i> indices (all data)                            | <i>R</i> <sub>1</sub> = 0.0757, <i>wR</i> <sub>2</sub> = 0.1517 |

**Table S32.** Atomic Coordinates and Equivalent Isotropic Displacement Parameters ( $\text{\AA}^2$ ) for [Fe(TPP)(NO)] at 130 K, crystal 4<sup>a</sup>

| atom  | <i>x</i>   | <i>y</i>   | <i>z</i>  | <i>U</i> (eq) |
|-------|------------|------------|-----------|---------------|
| Fe(1) | −0.0198(4) | 0.4980(5)  | 0.9983(6) | 0.0221(4)     |
| N(1)  | 0.0363(3)  | 0.3191(2)  | 1.1076(2) | 0.0222(5)     |
| N(2)  | 0.1434(3)  | 0.3910(3)  | 0.8208(2) | 0.0237(5)     |
| N(3)  | −0.1910(5) | 0.4905(5)  | 0.9910(5) | 0.0237(9)     |
| O(1)  | −0.3205(5) | 0.5546(5)  | 1.0025(6) | 0.0425(11)    |
| C(a1) | −0.0268(3) | 0.3024(3)  | 1.2526(3) | 0.0235(6)     |
| C(b1) | 0.0296(4)  | 0.1543(3)  | 1.2878(3) | 0.0282(6)     |
| C(b2) | 0.1271(4)  | 0.0804(3)  | 1.1666(3) | 0.0280(6)     |
| C(a2) | 0.1315(4)  | 0.1830(3)  | 1.0536(3) | 0.0239(6)     |
| C(m1) | 0.2198(3)  | 0.1448(3)  | 0.9122(3) | 0.0233(5)     |
| C(a3) | 0.2214(4)  | 0.2459(3)  | 0.8038(3) | 0.0244(6)     |
| C(b3) | 0.3108(4)  | 0.2071(3)  | 0.6561(3) | 0.0280(6)     |
| C(b4) | 0.2874(4)  | 0.3310(3)  | 0.5836(3) | 0.0289(6)     |
| C(a4) | 0.1836(3)  | 0.4448(3)  | 0.6849(3) | 0.0236(5)     |
| C(m2) | 0.1306(3)  | 0.5885(3)  | 0.6504(3) | 0.0228(5)     |
| C(10) | 0.3165(3)  | −0.0083(3) | 0.8728(3) | 0.0236(5)     |
| C(11) | 0.4771(4)  | −0.0585(4) | 0.8487(4) | 0.0360(7)     |
| C(12) | 0.5668(4)  | −0.2008(4) | 0.8138(4) | 0.0394(8)     |
| C(13) | 0.4986(4)  | −0.2948(3) | 0.8004(3) | 0.0326(6)     |
| C(14) | 0.3393(4)  | −0.2451(4) | 0.8232(4) | 0.0411(8)     |
| C(15) | 0.2490(4)  | −0.1031(4) | 0.8592(4) | 0.0397(8)     |
| C(20) | 0.1908(4)  | 0.6278(3)  | 0.4964(3) | 0.0242(5)     |
| C(21) | 0.3376(4)  | 0.6468(4)  | 0.4317(3) | 0.0337(7)     |
| C(22) | 0.3948(4)  | 0.6820(4)  | 0.2893(3) | 0.0366(7)     |
| C(23) | 0.3042(4)  | 0.6985(3)  | 0.2121(3) | 0.0323(6)     |
| C(24) | 0.1569(4)  | 0.6816(4)  | 0.2760(3) | 0.0396(8)     |
| C(25) | 0.0995(4)  | 0.6464(4)  | 0.4189(3) | 0.0360(7)     |

<sup>a</sup> *U*(eq) is defined as one third of the trace of the orthogonalized  $\mathbf{U}_{ij}$  tensor. The estimated standard deviations of the least significant digits are given in parentheses.

**Table S33.** Bond Lengths for [Fe(TPP)(NO)] at 130 K, crystal 4<sup>a</sup>

| bond          | length (Å) | bond          | length (Å) |
|---------------|------------|---------------|------------|
| Fe(1)–Fe(1)#1 | 0.418(4)   | C(b4)–H(b4)   | 0.9500     |
| Fe(1)–N(3)    | 1.728(5)   | C(a4)–C(m2)   | 1.390(4)   |
| Fe(1)–N(1)#1  | 1.986(6)   | C(m2)–C(a1#1) | 1.379(4)   |
| Fe(1)–N(2)#1  | 1.993(6)   | C(m2)–C(20)   | 1.510(3)   |
| Fe(1)–N(2)    | 1.999(6)   | C(10)–C(15)   | 1.378(5)   |
| Fe(1)–N(1)    | 2.008(6)   | C(10)–C(11)   | 1.384(4)   |
| Fe(1)–N(3)#1  | 2.145(5)   | C(11)–C(12)   | 1.380(4)   |
| N(1)–C(a2)    | 1.379(4)   | C(11)–H(11)   | 0.9500     |
| N(1)–C(a1)    | 1.385(3)   | C(12)–C(13)   | 1.376(5)   |
| N(1)–Fe(1)#1  | 1.986(6)   | C(12)–H(12)   | 0.9500     |
| N(2)–C(a3)    | 1.371(4)   | C(13)–C(14)   | 1.376(5)   |
| N(2)–C(a4)    | 1.386(3)   | C(13)–H(13)   | 0.9500     |
| N(2)–Fe(1)#1  | 1.993(6)   | C(14)–C(15)   | 1.381(5)   |
| N(3)–O(1)     | 1.156(6)   | C(14)–H(14)   | 0.9500     |
| N(3)–Fe(1)#1  | 2.145(5)   | C(15)–H(15)   | 0.9500     |
| C(a1)–C(m2#1) | 1.379(4)   | C(20)–C(21)   | 1.377(4)   |
| C(a1)–C(b1)   | 1.434(4)   | C(20)–C(25)   | 1.382(4)   |
| C(b1)–C(b2)   | 1.344(4)   | C(21)–C(22)   | 1.394(4)   |
| C(b1)–H(b1)   | 0.9500     | C(21)–H(21)   | 0.9500     |
| C(b2)–C(a2)   | 1.445(4)   | C(22)–C(23)   | 1.376(5)   |
| C(b2)–H(b2)   | 0.9500     | C(22)–H(22)   | 0.9500     |
| C(a2)–C(m1)   | 1.388(4)   | C(23)–C(24)   | 1.372(5)   |
| C(m1)–C(a3)   | 1.403(4)   | C(23)–H(23)   | 0.9500     |
| C(m1)–C(10)   | 1.488(4)   | C(24)–C(25)   | 1.398(4)   |
| C(a3)–C(b3)   | 1.445(4)   | C(24)–H(24)   | 0.9500     |
| C(b3)–C(b4)   | 1.353(4)   | C(25)–H(25)   | 0.9500     |
| C(b3)–H(b3)   | 0.9500     |               |            |
| C(b4)–C(a4)   | 1.434(4)   |               |            |

<sup>a</sup>The estimated standard deviations of the least significant digits are given in parentheses.

**Table S34.** Bond Angles for [Fe(TPP)(NO)] at 130 K, crystal 4<sup>a</sup>

| angle                | degree     | angle               | degree   |
|----------------------|------------|---------------------|----------|
| Fe(1)#1–Fe(1)–N(3)   | 176.6(16)  | N(2)–C(a3)–C(b3)    | 111.1(2) |
| Fe(1)#1–Fe(1)–N(1)#1 | 86.9(15)   | C(m1)–C(a3)–C(b3)   | 122.7(3) |
| N(3)–Fe(1)–N(1)#1    | 91.7(3)    | C(b4)–C(b3)–C(a3)   | 106.3(2) |
| Fe(1)#1–Fe(1)–N(2)#1 | 84.7(14)   | C(b4)–C(b3)–H(b3)   | 126.9    |
| N(3)–Fe(1)–N(2)#1    | 92.1(3)    | C(a3)–C(b3)–H(b3)   | 126.9    |
| N(1)#1–Fe(1)–N(2)#1  | 89.7(2)    | C(b3)–C(b4)–C(a4)   | 107.3(2) |
| Fe(1)#1–Fe(1)–N(2)   | 83.3(14)   | C(b3)–C(b4)–H(b4)   | 126.3    |
| N(3)–Fe(1)–N(2)      | 99.9(3)    | C(a4)–C(b4)–H(b4)   | 126.3    |
| N(1)#1–Fe(1)–N(2)    | 89.6(2)    | N(2)–C(a4)–C(m2)    | 125.2(2) |
| N(2)#1–Fe(1)–N(2)    | 167.99(10) | N(2)–C(a4)–C(b4)    | 110.5(2) |
| Fe(1)#1–Fe(1)–N(1)   | 81.1(15)   | C(m2)–C(a4)–C(b4)   | 124.3(2) |
| N(3)–Fe(1)–N(1)      | 100.2(3)   | C(a1#1)–C(m2)–C(a4) | 124.4(2) |
| N(1)#1–Fe(1)–N(1)    | 168.01(10) | C(a1#1)–C(m2)–C(20) | 117.8(2) |
| N(2)#1–Fe(1)–N(1)    | 89.2(2)    | C(a4)–C(m2)–C(20)   | 117.7(2) |
| N(2)–Fe(1)–N(1)      | 88.9(2)    | C(15)–C(10)–C(11)   | 118.4(3) |
| Fe(1)#1–Fe(1)–N(3)#1 | 2.8(13)    | C(15)–C(10)–C(m1)   | 121.1(3) |
| N(3)–Fe(1)–N(3)#1    | 179.3(3)   | C(11)–C(10)–C(m1)   | 120.5(3) |
| N(1)#1–Fe(1)–N(3)#1  | 88.0(2)    | C(12)–C(11)–C(10)   | 120.7(3) |
| N(2)#1–Fe(1)–N(3)#1  | 87.3(2)    | C(12)–C(11)–H(11)   | 119.6    |
| N(2)–Fe(1)–N(3)#1    | 80.73(19)  | C(10)–C(11)–H(11)   | 119.6    |
| N(1)–Fe(1)–N(3)#1    | 80.0(2)    | C(13)–C(12)–C(11)   | 120.5(3) |
| C(a2)–N(1)–C(a1)     | 105.2(2)   | C(13)–C(12)–H(12)   | 119.7    |
| C(a2)–N(1)–Fe(1)#1   | 126.8(2)   | C(11)–C(12)–H(12)   | 119.7    |
| C(a1)–N(1)–Fe(1)#1   | 127.4(2)   | C(14)–C(13)–C(12)   | 118.9(3) |
| C(a2)–N(1)–Fe(1)     | 127.1(2)   | C(14)–C(13)–H(13)   | 120.5    |
| C(a1)–N(1)–Fe(1)     | 127.3(2)   | C(12)–C(13)–H(13)   | 120.5    |
| Fe(1)#1–N(1)–Fe(1)   | 11.99(10)  | C(13)–C(14)–C(15)   | 120.7(3) |
| C(a3)–N(2)–C(a4)     | 104.9(2)   | C(13)–C(14)–H(14)   | 119.7    |
| C(a3)–N(2)–Fe(1)#1   | 127.3(2)   | C(15)–C(14)–H(14)   | 119.7    |
| C(a4)–N(2)–Fe(1)#1   | 127.6(3)   | C(10)–C(15)–C(14)   | 120.7(3) |
| C(a3)–N(2)–Fe(1)     | 127.6(2)   | C(10)–C(15)–H(15)   | 119.6    |
| C(a4)–N(2)–Fe(1)     | 126.9(2)   | C(14)–C(15)–H(15)   | 119.6    |
| Fe(1)#1–N(2)–Fe(1)   | 12.01(10)  | C(21)–C(20)–C(25)   | 119.2(2) |
| O(1)–N(3)–Fe(1)      | 145.7(5)   | C(21)–C(20)–C(m2)   | 120.1(3) |

**Table S34.** Continued

| angle               | degree   | angle             | degree   |
|---------------------|----------|-------------------|----------|
| O(1)–N(3)–Fe(1)#1   | 145.1(4) | C(25)–C(20)–C(m2) | 120.7(3) |
| Fe(1)–N(3)–Fe(1)#1  | 0.7(3)   | C(20)–C(21)–C(22) | 120.5(3) |
| C(m2#1)–C(a1)–N(1)  | 125.3(3) | C(20)–C(21)–H(21) | 119.7    |
| C(m2#1)–C(a1)–C(b1) | 124.6(2) | C(22)–C(21)–H(21) | 119.7    |
| N(1)–C(a1)–C(b1)    | 110.1(2) | C(23)–C(22)–C(21) | 120.0(3) |
| C(b2)–C(b1)–C(a1)   | 107.6(2) | C(23)–C(22)–H(22) | 120.0    |
| C(b2)–C(b1)–H(b1)   | 126.2    | C(21)–C(22)–H(22) | 120.0    |
| C(a1)–C(b1)–H(b1)   | 126.2    | C(24)–C(23)–C(22) | 119.8(3) |
| C(b1)–C(b2)–C(a2)   | 106.8(2) | C(24)–C(23)–H(23) | 120.1    |
| C(b1)–C(b2)–H(b2)   | 126.6    | C(22)–C(23)–H(23) | 120.1    |
| C(a2)–C(b2)–H(b2)   | 126.6    | C(23)–C(24)–C(25) | 120.2(3) |
| N(1)–C(a2)–C(m1)    | 126.7(2) | C(23)–C(24)–H(24) | 119.9    |
| N(1)–C(a2)–C(b2)    | 110.2(2) | C(25)–C(24)–H(24) | 119.9    |
| C(m1)–C(a2)–C(b2)   | 123.0(2) | C(20)–C(25)–C(24) | 120.2(3) |
| C(a2)–C(m1)–C(a3)   | 122.2(2) | C(20)–C(25)–H(25) | 119.9    |
| C(a2)–C(m1)–C(10)   | 119.4(2) | C(24)–C(25)–H(25) | 119.9    |
| C(a3)–C(m1)–C(10)   | 118.4(2) |                   |          |
| N(2)–C(a3)–C(m1)    | 126.2(3) |                   |          |

<sup>a</sup>The estimated standard deviations of the least significant digits are given in parentheses.



**Table S35.** Anisotropic Displacement Parameters ( $\text{\AA}^2$ ) for  $[\text{Fe}(\text{TPP})(\text{NO})]$  at 130 K, crystal 4<sup>a</sup>

| atom  | $U_{11}$   | $U_{22}$   | $U_{33}$   | $U_{23}$    | $U_{13}$    | $U_{12}$    |
|-------|------------|------------|------------|-------------|-------------|-------------|
| Fe(1) | 0.0255(15) | 0.0228(4)  | 0.0155(4)  | 0.0036(3)   | -0.0069(11) | -0.0077(11) |
| N(1)  | 0.0218(12) | 0.0232(12) | 0.0147(10) | 0.0021(8)   | -0.0042(9)  | -0.0037(9)  |
| N(2)  | 0.0245(12) | 0.0275(13) | 0.0168(10) | 0.0038(9)   | -0.0082(10) | -0.0073(10) |
| N(3)  | 0.027(2)   | 0.025(2)   | 0.017(2)   | 0.0034(17)  | -0.0082(19) | -0.0080(18) |
| O(1)  | 0.028(2)   | 0.051(3)   | 0.047(3)   | 0.001(2)    | -0.019(2)   | -0.006(2)   |
| C(a1) | 0.0241(14) | 0.0262(14) | 0.0181(13) | 0.0046(10)  | -0.0081(11) | -0.0077(11) |
| C(b1) | 0.0301(15) | 0.0254(14) | 0.0222(13) | 0.0064(11)  | -0.0075(12) | -0.0071(12) |
| C(b2) | 0.0311(15) | 0.0243(14) | 0.0225(13) | 0.0046(11)  | -0.0084(12) | -0.0063(12) |
| C(a2) | 0.0238(14) | 0.0255(14) | 0.0208(13) | 0.0076(10)  | -0.0098(11) | -0.0077(11) |
| C(m1) | 0.0215(13) | 0.0261(14) | 0.0221(13) | 0.0047(10)  | -0.0099(11) | -0.0078(11) |
| C(a3) | 0.0254(14) | 0.0274(15) | 0.0203(12) | 0.0031(11)  | -0.0109(12) | -0.0073(12) |
| C(b3) | 0.0302(15) | 0.0266(14) | 0.0218(13) | 0.0004(11)  | -0.0090(12) | -0.0048(12) |
| C(b4) | 0.0307(16) | 0.0322(16) | 0.0172(12) | 0.0008(11)  | -0.0076(12) | -0.0051(13) |
| C(a4) | 0.0257(14) | 0.0263(14) | 0.0162(12) | 0.0038(10)  | -0.0082(11) | -0.0071(11) |
| C(m2) | 0.0224(13) | 0.0282(14) | 0.0154(11) | 0.0070(10)  | -0.0068(10) | -0.0089(11) |
| C(10) | 0.0254(14) | 0.0236(13) | 0.0183(12) | 0.0027(10)  | -0.0071(11) | -0.0066(11) |
| C(11) | 0.0299(16) | 0.0300(16) | 0.052(2)   | -0.0038(14) | -0.0191(15) | -0.0085(13) |
| C(12) | 0.0303(17) | 0.0345(18) | 0.051(2)   | -0.0050(15) | -0.0177(15) | -0.0035(14) |
| C(13) | 0.0448(19) | 0.0243(14) | 0.0189(12) | -0.0018(10) | -0.0064(13) | -0.0068(13) |
| C(14) | 0.0444(19) | 0.0336(18) | 0.049(2)   | -0.0068(15) | -0.0159(16) | -0.0168(15) |
| C(15) | 0.0290(16) | 0.0401(19) | 0.055(2)   | -0.0035(16) | -0.0169(15) | -0.0148(14) |
| C(20) | 0.0289(14) | 0.0239(13) | 0.0151(11) | 0.0028(9)   | -0.0071(11) | -0.0064(11) |
| C(21) | 0.0313(15) | 0.0468(19) | 0.0230(14) | 0.0075(13)  | -0.0106(12) | -0.0154(14) |
| C(22) | 0.0358(16) | 0.0429(19) | 0.0246(14) | 0.0067(13)  | -0.0049(13) | -0.0161(14) |
| C(23) | 0.0451(18) | 0.0255(14) | 0.0179(12) | 0.0060(10)  | -0.0072(13) | -0.0106(13) |
| C(24) | 0.053(2)   | 0.047(2)   | 0.0253(15) | 0.0075(14)  | -0.0234(15) | -0.0158(16) |
| C(25) | 0.0372(17) | 0.050(2)   | 0.0280(16) | 0.0108(14)  | -0.0159(14) | -0.0226(15) |

<sup>a</sup>The estimated standard deviations of the least significant digits are given in parentheses. The anisotropic displacement factor exponent takes the form:  $-2 \pi [h^2 U_{11} + \dots + 2 h k a^* b^* U_{12}]$ .

**Table S36.** Hydrogen Atom Coordinates and Equivalent Isotropic Displacement Parameters ( $\text{\AA}^2$ ) for  $[\text{Fe}(\text{TPP})(\text{NO})]$  at 130 K, crystal 4<sup>a</sup>

| atom  | $x$     | $y$     | $z$    | $U(\text{eq})$ |
|-------|---------|---------|--------|----------------|
| H(b1) | 0.0030  | 0.1155  | 1.3801 | 0.034          |
| H(b2) | 0.1824  | -0.0201 | 1.1570 | 0.034          |
| H(b3) | 0.3734  | 0.1133  | 0.6177 | 0.034          |
| H(b4) | 0.3316  | 0.3408  | 0.4840 | 0.035          |
| H(11) | 0.5261  | 0.0056  | 0.8563 | 0.043          |
| H(12) | 0.6766  | -0.2340 | 0.7989 | 0.047          |
| H(13) | 0.5606  | -0.3926 | 0.7757 | 0.039          |
| H(14) | 0.2909  | -0.3090 | 0.8142 | 0.049          |
| H(15) | 0.1391  | -0.0705 | 0.8747 | 0.048          |
| H(21) | 0.4004  | 0.6359  | 0.4847 | 0.040          |
| H(22) | 0.4964  | 0.6945  | 0.2455 | 0.044          |
| H(23) | 0.3436  | 0.7216  | 0.1148 | 0.039          |
| H(24) | 0.0939  | 0.6938  | 0.2231 | 0.047          |
| H(25) | -0.0028 | 0.6352  | 0.4628 | 0.043          |

<sup>a</sup> $U(\text{eq})$  is defined as one third of the trace of the orthogonalized  $\mathbf{U}_{ij}$  tensor the estimated standard deviations of the least significant digits are given in parentheses.

## Supporting Information

**Table S37.** Complete Crystallographic Details for [Fe(TPP)(NO)] at 180 K, crystal 1

|                                                              |                                                                 |
|--------------------------------------------------------------|-----------------------------------------------------------------|
| formula                                                      | C <sub>44</sub> H <sub>28</sub> FeN <sub>5</sub> O              |
| FW, amu                                                      | 698.56                                                          |
| <i>a</i> , Å                                                 | 9.765(2)                                                        |
| <i>b</i> , Å                                                 | 10.120(2)                                                       |
| <i>c</i> , Å                                                 | 10.466(2)                                                       |
| $\alpha$ , deg                                               | 81.35(2)                                                        |
| $\beta$ , deg                                                | 65.23(2)                                                        |
| $\gamma$ , deg                                               | 68.12(2)                                                        |
| <i>V</i> , Å <sup>3</sup>                                    | 871.4(4)                                                        |
| space group                                                  | <i>P</i> $\bar{1}$                                              |
| <i>Z</i>                                                     | 1                                                               |
| D <sub>c</sub> , g/cm <sup>3</sup>                           | 1.331                                                           |
| F(000)                                                       | 361                                                             |
| $\mu$ , mm <sup>-1</sup>                                     | 0.476                                                           |
| crystal dimensions, mm                                       | 0.21 × 0.17 × 0.08                                              |
| radiation                                                    | MoK $\alpha$ , $\bar{\lambda}$ = 0.71073 Å                      |
| temperature, K                                               | 180(2)                                                          |
| diffractometer                                               | Bruker SMART Apex II                                            |
| $\theta$ range for collected data, deg                       | 3.04–28.37                                                      |
| index range                                                  | –11 ≤ <i>h</i> ≤ 13<br>–13 ≤ <i>k</i> ≤ 13<br>0 ≤ <i>l</i> ≤ 13 |
| total data collected                                         | 4628                                                            |
| absorption correction                                        | Semi-empirical fromequiv                                        |
| relative transmission coefficients (I)                       | 0.9629 and 0.9067                                               |
| unique data                                                  | 4628 ( <i>R</i> <sub>int</sub> = 0.0764)                        |
| unique observed data [ <i>I</i> > 2 $\sigma$ ( <i>I</i> )]   | 2579                                                            |
| refinement method                                            | Full-matrix least-squares on <i>F</i> <sup>2</sup>              |
| data/restraints/parameters                                   | 4628/0/247                                                      |
| goodness-of-fit (pased on <i>F</i> <sup>2</sup> )            | 0.893                                                           |
| final <i>R</i> indices [ <i>I</i> > 2 $\sigma$ ( <i>I</i> )] | <i>R</i> <sub>1</sub> = 0.0481, <i>wR</i> <sub>2</sub> = 0.0981 |
| final <i>R</i> indices (all data)                            | <i>R</i> <sub>1</sub> = 0.1034, <i>wR</i> <sub>2</sub> = 0.1102 |

**Table S38.** Atomic Coordinates and Equivalent Isotropic Displacement Parameters ( $\text{\AA}^2$ ) for [Fe(TPP)(NO)] at 180 K, crystal 1<sup>a</sup>

| atom  | <i>x</i>   | <i>y</i>    | <i>z</i>    | <i>U</i> (eq) |
|-------|------------|-------------|-------------|---------------|
| Fe(1) | 0.4794(5)  | 0.4972(7)   | 0.5008(8)   | 0.0274(6)     |
| N(1)  | 0.4619(2)  | 0.68075(18) | 0.39300(19) | 0.0291(5)     |
| N(2)  | 0.3566(2)  | 0.60801(19) | 0.67935(18) | 0.0286(5)     |
| C(m1) | 0.6301(3)  | 0.5889(2)   | 0.1504(2)   | 0.0296(5)     |
| C(m2) | 0.2801(3)  | 0.8529(2)   | 0.5884(2)   | 0.0282(5)     |
| C(a1) | 0.5255(3)  | 0.6974(2)   | 0.2482(2)   | 0.0300(6)     |
| C(a2) | 0.3673(3)  | 0.8151(2)   | 0.4472(2)   | 0.0287(5)     |
| C(a3) | 0.2773(3)  | 0.7531(2)   | 0.6972(2)   | 0.0310(6)     |
| C(a4) | 0.3170(3)  | 0.5539(2)   | 0.8147(2)   | 0.0315(6)     |
| C(b1) | 0.4694(3)  | 0.8445(2)   | 0.2135(2)   | 0.0370(6)     |
| C(b2) | 0.3717(3)  | 0.9179(2)   | 0.3350(2)   | 0.0346(6)     |
| C(b3) | 0.1897(3)  | 0.7896(2)   | 0.8428(2)   | 0.0381(6)     |
| C(b4) | 0.2138(3)  | 0.6672(2)   | 0.9150(2)   | 0.0369(6)     |
| C(10) | 0.6892(3)  | 0.6280(2)   | -0.0032(2)  | 0.0311(6)     |
| C(11) | 0.8357(3)  | 0.6466(3)   | -0.0691(3)  | 0.0430(7)     |
| C(12) | 0.8920(3)  | 0.6813(3)   | -0.2102(3)  | 0.0457(7)     |
| C(13) | 0.8018(3)  | 0.6979(2)   | -0.2867(3)  | 0.0427(7)     |
| C(14) | 0.6541(4)  | 0.6817(3)   | -0.2212(3)  | 0.0521(8)     |
| C(15) | 0.5982(3)  | 0.6473(3)   | -0.0792(3)  | 0.0460(7)     |
| C(20) | 0.1843(3)  | 1.0063(2)   | 0.6278(2)   | 0.0291(5)     |
| C(21) | 0.0231(3)  | 1.0604(3)   | 0.6514(3)   | 0.0436(7)     |
| C(22) | -0.0651(3) | 1.2025(3)   | 0.6861(3)   | 0.0514(8)     |
| C(23) | 0.0043(4)  | 1.2918(3)   | 0.6988(2)   | 0.0427(7)     |
| C(24) | 0.1638(4)  | 1.2381(3)   | 0.6768(3)   | 0.0510(8)     |
| C(25) | 0.2525(3)  | 1.0969(3)   | 0.6411(3)   | 0.0470(7)     |
| N(3)  | 0.3085(4)  | 0.4909(4)   | 0.4914(4)   | 0.0293(9)     |
| O(1)  | 0.1806(4)  | 0.5506(4)   | 0.5019(4)   | 0.0590(11)    |

<sup>a</sup> *U*(eq) is defined as one third of the trace of the orthogonalized  $\mathbf{U}_{ij}$  tensor. The estimated standard deviations of the least significant digits are given in parentheses.

**Table S39.** Bond Lengths for [Fe(TPP)(NO)] at 180 K, crystal 1<sup>a</sup>

| bond          | length (Å) | bond         | length (Å) |
|---------------|------------|--------------|------------|
| Fe(1)–Fe(1)#1 | 0.421(6)   | C(b3)–H(b3)  | 0.9500     |
| Fe(1)–N(3)    | 1.736(5)   | C(b4)–H(b4)  | 0.9500     |
| Fe(1)–N(2)    | 1.984(7)   | C(10)–C(15)  | 1.370(3)   |
| Fe(1)–N(1)#1  | 1.993(7)   | C(10)–C(11)  | 1.376(3)   |
| Fe(1)–N(1)    | 2.012(7)   | C(11)–C(12)  | 1.384(3)   |
| Fe(1)–N(2)#1  | 2.014(7)   | C(11)–H(11)  | 0.9500     |
| Fe(1)–N(3)#1  | 2.154(5)   | C(12)–C(13)  | 1.372(4)   |
| N(1)–C(a2)    | 1.371(3)   | C(12)–H(12)  | 0.9500     |
| N(1)–C(a1)    | 1.387(3)   | C(13)–C(14)  | 1.376(4)   |
| N(1)–Fe(1)#1  | 1.993(7)   | C(13)–H(13)  | 0.9500     |
| N(2)–C(a3)    | 1.380(3)   | C(14)–C(15)  | 1.390(3)   |
| N(2)–C(a4)    | 1.386(3)   | C(14)–H(14)  | 0.9500     |
| N(2)–Fe(1)#1  | 2.014(7)   | C(15)–H(15)  | 0.9500     |
| C(m1)–C(a1)   | 1.386(3)   | C(20)–C(25)  | 1.369(4)   |
| C(m1)–C(a4#1) | 1.390(3)   | C(20)–C(21)  | 1.383(4)   |
| C(m1)–C(10)   | 1.508(3)   | C(21)–C(22)  | 1.384(3)   |
| C(m2)–C(a2)   | 1.389(3)   | C(21)–H(21)  | 0.9500     |
| C(m2)–C(a3)   | 1.402(3)   | C(22)–C(23)  | 1.364(4)   |
| C(m2)–C(20)   | 1.497(3)   | C(22)–H(22)  | 0.9500     |
| C(a1)–C(b1)   | 1.431(3)   | C(23)–C(24)  | 1.371(4)   |
| C(a2)–C(b2)   | 1.444(3)   | C(23)–H(23)  | 0.9500     |
| C(a3)–C(b3)   | 1.426(3)   | C(24)–C(25)  | 1.378(3)   |
| C(a4)–C(m1#1) | 1.390(3)   | C(24)–H(24)  | 0.9500     |
| C(a4)–C(b4)   | 1.431(3)   | C(25)–H(25)  | 0.9500     |
| C(b1)–C(b2)   | 1.348(3)   | N(3)–O(1)    | 1.131(4)   |
| C(b1)–H(b1)   | 0.9500     | N(3)–Fe(1)#1 | 2.154(5)   |
| C(b2)–H(b2)   | 0.9500     |              |            |
| C(b3)–C(b4)   | 1.345(3)   |              |            |

<sup>a</sup>The estimated standard deviations of the least significant digits are given in parentheses.

**Table S40.** Bond Angles for [Fe(TPP)(NO)] at 180 K, crystal 1<sup>a</sup>

| angle                | degree     | angle             | degree     |
|----------------------|------------|-------------------|------------|
| Fe(1)#1–Fe(1)–N(3)   | 173(2)     | C(b2)–C(b1)–H(b1) | 126.2      |
| Fe(1)#1–Fe(1)–N(2)   | 88(2)      | C(a1)–C(b1)–H(b1) | 126.2      |
| N(3)–Fe(1)–N(2)      | 93.6(3)    | C(b1)–C(b2)–C(a2) | 106.71(19) |
| Fe(1)#1–Fe(1)–N(1)#1 | 87(2)      | C(b1)–C(b2)–H(b2) | 126.6      |
| N(3)–Fe(1)–N(1)#1    | 100.5(3)   | C(a2)–C(b2)–H(b2) | 126.6      |
| N(2)–Fe(1)–N(1)#1    | 90.2(3)    | C(b4)–C(b3)–C(a3) | 106.9(2)   |
| Fe(1)#1–Fe(1)–N(1)   | 81.4(19)   | C(b4)–C(b3)–H(b3) | 126.5      |
| N(3)–Fe(1)–N(1)      | 91.5(3)    | C(a3)–C(b3)–H(b3) | 126.5      |
| N(2)–Fe(1)–N(1)      | 89.4(3)    | C(b3)–C(b4)–C(a4) | 107.5(2)   |
| N(1)#1–Fe(1)–N(1)    | 167.95(17) | C(b3)–C(b4)–H(b4) | 126.2      |
| Fe(1)#1–Fe(1)–N(2)#1 | 79.9(19)   | C(a4)–C(b4)–H(b4) | 126.2      |
| N(3)–Fe(1)–N(2)#1    | 98.4(3)    | C(15)–C(10)–C(11) | 118.8(2)   |
| N(2)–Fe(1)–N(2)#1    | 167.96(18) | C(15)–C(10)–C(m1) | 121.1(2)   |
| N(1)#1–Fe(1)–N(2)#1  | 89.1(3)    | C(11)–C(10)–C(m1) | 120.2(2)   |
| N(1)–Fe(1)–N(2)#1    | 88.8(3)    | C(10)–C(11)–C(12) | 120.8(3)   |
| Fe(1)#1–Fe(1)–N(3)#1 | 5.8(18)    | C(10)–C(11)–H(11) | 119.6      |
| N(3)–Fe(1)–N(3)#1    | 178.6(4)   | C(12)–C(11)–H(11) | 119.6      |
| N(2)–Fe(1)–N(3)#1    | 86.7(2)    | C(13)–C(12)–C(11) | 120.3(3)   |
| N(1)#1–Fe(1)–N(3)#1  | 80.9(2)    | C(13)–C(12)–H(12) | 119.9      |
| N(1)–Fe(1)–N(3)#1    | 87.1(2)    | C(11)–C(12)–H(12) | 119.9      |
| N(2)#1–Fe(1)–N(3)#1  | 81.3(2)    | C(12)–C(13)–C(14) | 119.4(2)   |
| C(a2)–N(1)–C(a1)     | 105.52(18) | C(12)–C(13)–H(13) | 120.3      |
| C(a2)–N(1)–Fe(1)#1   | 127.4(3)   | C(14)–C(13)–H(13) | 120.3      |
| C(a1)–N(1)–Fe(1)#1   | 126.6(2)   | C(13)–C(14)–C(15) | 119.9(3)   |
| C(a2)–N(1)–Fe(1)     | 126.5(3)   | C(13)–C(14)–H(14) | 120.0      |
| C(a1)–N(1)–Fe(1)     | 127.5(3)   | C(15)–C(14)–H(14) | 120.0      |
| C(a3)–N(2)–C(a4)     | 104.73(18) | C(10)–C(15)–C(14) | 120.9(3)   |
| C(a3)–N(2)–Fe(1)     | 128.1(3)   | C(10)–C(15)–H(15) | 119.6      |
| C(a4)–N(2)–Fe(1)     | 126.9(3)   | C(14)–C(15)–H(15) | 119.6      |
| C(a3)–N(2)–Fe(1)#1   | 127.2(2)   | C(25)–C(20)–C(21) | 118.1(2)   |
| C(a4)–N(2)–Fe(1)#1   | 127.4(3)   | C(25)–C(20)–C(m2) | 121.5(2)   |
| C(a1)–C(m1)–C(a4)#1  | 123.9(2)   | C(21)–C(20)–C(m2) | 120.3(2)   |
| C(a1)–C(m1)–C(10)    | 118.13(19) | C(20)–C(21)–C(22) | 120.4(3)   |
| C(a4#1)–C(m1)–C(10)  | 117.97(19) | C(20)–C(21)–H(21) | 119.8      |

**Table S40.** Continued

| angle               | degree     | angle             | degree   |
|---------------------|------------|-------------------|----------|
| C(a2)–C(m2)–C(a3)   | 122.8(2)   | C(22)–C(21)–H(21) | 119.8    |
| C(a2)–C(m2)–C(20)   | 119.25(19) | C(23)–C(22)–C(21) | 121.0(3) |
| C(a3)–C(m2)–C(20)   | 118.0(2)   | C(23)–C(22)–H(22) | 119.5    |
| C(m1)–C(a1)–N(1)    | 125.7(2)   | C(21)–C(22)–H(22) | 119.5    |
| C(m1)–C(a1)–C(b1)   | 124.4(2)   | C(22)–C(23)–C(24) | 118.8(2) |
| N(1)–C(a1)–C(b1)    | 109.93(18) | C(22)–C(23)–H(23) | 120.6    |
| N(1)–C(a2)–C(m2)    | 126.8(2)   | C(24)–C(23)–H(23) | 120.6    |
| N(1)–C(a2)–C(b2)    | 110.3(2)   | C(23)–C(24)–C(25) | 120.5(3) |
| C(m2)–C(a2)–C(b2)   | 122.9(2)   | C(23)–C(24)–H(24) | 119.7    |
| N(2)–C(a3)–C(m2)    | 125.4(2)   | C(25)–C(24)–H(24) | 119.7    |
| N(2)–C(a3)–C(b3)    | 110.81(19) | C(20)–C(25)–C(24) | 121.3(2) |
| C(m2)–C(a3)–C(b3)   | 123.8(2)   | C(20)–C(25)–H(25) | 119.4    |
| N(2)–C(a4)–C(m1#1)  | 125.6(2)   | C(24)–C(25)–H(25) | 119.4    |
| N(2)–C(a4)–C(b4)    | 110.01(19) | O(1)–N(3)–Fe(1)   | 147.3(4) |
| C(m1#1)–C(a4)–C(b4) | 124.4(2)   | O(1)–N(3)–Fe(1)#1 | 146.5(4) |
| C(b2)–C(b1)–C(a1)   | 107.6(2)   |                   |          |

<sup>a</sup>The estimated standard deviations of the least significant digits are given in parentheses.

**Table S41.** Anisotropic Displacement Parameters ( $\text{\AA}^2$ ) for  $[\text{Fe}(\text{TPP})(\text{NO})]$  at 180 K, crystal 1<sup>a</sup>

| atom  | $U_{11}$   | $U_{22}$   | $U_{33}$   | $U_{23}$    | $U_{13}$    | $U_{12}$    |
|-------|------------|------------|------------|-------------|-------------|-------------|
| Fe(1) | 0.0263(19) | 0.0261(5)  | 0.0208(3)  | 0.0031(3)   | -0.0021(15) | -0.0088(13) |
| N(1)  | 0.0277(11) | 0.0279(10) | 0.0237(11) | 0.0030(8)   | -0.0083(9)  | -0.0045(9)  |
| N(2)  | 0.0291(11) | 0.0276(10) | 0.0229(10) | 0.0035(8)   | -0.0089(9)  | -0.0062(9)  |
| C(m1) | 0.0278(13) | 0.0349(13) | 0.0223(12) | 0.0056(9)   | -0.0090(10) | -0.0097(11) |
| C(m2) | 0.0264(13) | 0.0261(12) | 0.0285(13) | 0.0005(9)   | -0.0102(11) | -0.0060(10) |
| C(a1) | 0.0292(13) | 0.0325(13) | 0.0252(13) | 0.0045(10)  | -0.0099(11) | -0.0098(11) |
| C(a2) | 0.0265(13) | 0.0297(12) | 0.0279(13) | 0.0034(9)   | -0.0107(11) | -0.0088(11) |
| C(a3) | 0.0280(14) | 0.0308(13) | 0.0282(13) | -0.0008(10) | -0.0091(11) | -0.0058(11) |
| C(a4) | 0.0292(14) | 0.0342(13) | 0.0251(13) | 0.0032(10)  | -0.0096(11) | -0.0071(11) |
| C(b1) | 0.0395(15) | 0.0307(13) | 0.0327(14) | 0.0078(10)  | -0.0122(12) | -0.0088(11) |
| C(b2) | 0.0388(15) | 0.0263(12) | 0.0309(14) | 0.0035(10)  | -0.0117(12) | -0.0065(11) |
| C(b3) | 0.0376(15) | 0.0333(13) | 0.0334(14) | -0.0025(10) | -0.0097(12) | -0.0056(12) |
| C(b4) | 0.0417(15) | 0.0378(14) | 0.0202(12) | -0.0011(10) | -0.0063(11) | -0.0083(12) |
| C(10) | 0.0367(15) | 0.0263(12) | 0.0230(12) | 0.0041(9)   | -0.0092(11) | -0.0075(11) |
| C(11) | 0.0386(15) | 0.0575(17) | 0.0333(15) | 0.0095(12)  | -0.0145(13) | -0.0203(14) |
| C(12) | 0.0446(17) | 0.0527(17) | 0.0338(16) | 0.0052(12)  | -0.0063(13) | -0.0230(14) |
| C(13) | 0.0597(19) | 0.0292(13) | 0.0234(13) | 0.0046(10)  | -0.0073(13) | -0.0108(13) |
| C(14) | 0.067(2)   | 0.0599(19) | 0.0353(17) | 0.0122(13)  | -0.0296(15) | -0.0214(16) |
| C(15) | 0.0430(16) | 0.0623(18) | 0.0386(17) | 0.0121(13)  | -0.0192(13) | -0.0254(14) |
| C(20) | 0.0320(14) | 0.0284(12) | 0.0218(12) | 0.0007(9)   | -0.0072(11) | -0.0091(11) |
| C(21) | 0.0335(15) | 0.0347(15) | 0.0643(19) | -0.0080(12) | -0.0199(14) | -0.0098(12) |
| C(22) | 0.0367(17) | 0.0414(17) | 0.068(2)   | -0.0085(14) | -0.0202(15) | -0.0016(14) |
| C(23) | 0.059(2)   | 0.0263(13) | 0.0293(14) | -0.0017(10) | -0.0107(13) | -0.0077(14) |
| C(24) | 0.064(2)   | 0.0374(16) | 0.060(2)   | -0.0034(13) | -0.0260(16) | -0.0229(15) |
| C(25) | 0.0378(16) | 0.0440(17) | 0.063(2)   | -0.0056(13) | -0.0210(14) | -0.0144(14) |
| N(3)  | 0.028(2)   | 0.032(2)   | 0.022(2)   | 0.0044(16)  | -0.0101(18) | -0.0070(18) |
| O(1)  | 0.040(2)   | 0.069(3)   | 0.071(3)   | 0.004(2)    | -0.028(2)   | -0.017(2)   |

<sup>a</sup>The estimated standard deviations of the least significant digits are given in parentheses. The anisotropic displacement factor exponent takes the form:  $-2 \pi [\text{h}^2 U_{11} + \dots + 2 \text{h k a}^* \text{b}^* U_{12}]$ .



**Table S42.** Hydrogen Atom Coordinates and Equivalent Isotropic Displacement Parameters ( $\text{\AA}^2$ ) for  $[\text{Fe}(\text{TPP})(\text{NO})]$  at 180 K, crystal 1<sup>a</sup>

| atom  | $x$     | $y$    | $z$     | $U(\text{eq})$ |
|-------|---------|--------|---------|----------------|
| H(b1) | 0.4962  | 0.8835 | 0.1215  | 0.044          |
| H(b2) | 0.3165  | 1.0178 | 0.3449  | 0.042          |
| H(b3) | 0.1264  | 0.8825 | 0.8816  | 0.046          |
| H(b4) | 0.1702  | 0.6578 | 1.0144  | 0.044          |
| H(11) | 0.8990  | 0.6354 | -0.0171 | 0.052          |
| H(12) | 0.9934  | 0.6938 | -0.2544 | 0.055          |
| H(13) | 0.8411  | 0.7203 | -0.3839 | 0.051          |
| H(14) | 0.5902  | 0.6940 | -0.2730 | 0.063          |
| H(15) | 0.4957  | 0.6372 | -0.0343 | 0.055          |
| H(21) | -0.0274 | 0.9996 | 0.6437  | 0.052          |
| H(22) | -0.1756 | 1.2385 | 0.7013  | 0.062          |
| H(23) | -0.0567 | 1.3894 | 0.7224  | 0.051          |
| H(24) | 0.2135  | 1.2988 | 0.6862  | 0.061          |
| H(25) | 0.3631  | 1.0618 | 0.6254  | 0.056          |

<sup>a</sup> $U(\text{eq})$  is defined as one third of the trace of the orthogonalized  $\mathbf{U}_{ij}$  tensor the estimated standard deviations of the least significant digits are given in parentheses.

## Supporting Information

**Table S43.** Complete Crystallographic Details for [Fe(TPP)(NO)] at 273 K, crystal 4

|                                                              |                                                                   |
|--------------------------------------------------------------|-------------------------------------------------------------------|
| formula                                                      | C <sub>44</sub> H <sub>28</sub> FeN <sub>5</sub> O                |
| FW, amu                                                      | 698.56                                                            |
| <i>a</i> , Å                                                 | 13.4152(2)                                                        |
| <i>b</i> , Å                                                 | 13.4152(2)                                                        |
| <i>c</i> , Å                                                 | 9.7151(3)                                                         |
| $\beta$ , deg                                                | 90                                                                |
| <i>V</i> , Å <sup>3</sup>                                    | 1748.40(7)                                                        |
| space group                                                  | <i>I4/m</i>                                                       |
| <i>Z</i>                                                     | 2                                                                 |
| D <sub>c</sub> , g/cm <sup>3</sup>                           | 1.327                                                             |
| F(000)                                                       | 722                                                               |
| $\mu$ , mm <sup>-1</sup>                                     | 0.474                                                             |
| crystal dimensions, mm                                       | 0.28 × 0.28 × 0.28                                                |
| radiation                                                    | MoK $\alpha$ , $\bar{\lambda}$ = 0.71073 Å                        |
| temperature, K                                               | 272(2)                                                            |
| diffractometer                                               | Bruker Apex CCD                                                   |
| $\theta$ range for collected data, deg                       | 2.15–27.87                                                        |
| index range                                                  | –17 ≤ <i>h</i> ≤ 17<br>–17 ≤ <i>k</i> ≤ 17<br>–12 ≤ <i>l</i> ≤ 12 |
| total data collected                                         | 11545                                                             |
| absorption correction                                        | Semi-empirical fromequiv                                          |
| relative transmission coefficients (I)                       | 0.8783 and 0.8783                                                 |
| unique data                                                  | 1101 ( <i>R</i> <sub>int</sub> = 0.0238)                          |
| unique observed data [ <i>I</i> > 2 $\sigma$ ( <i>I</i> )]   | 918                                                               |
| refinement method                                            | Full-matrix least-squares on <i>F</i> <sup>2</sup>                |
| data/restraints/parameters                                   | 1101/0/82                                                         |
| goodness-of-fit (pased on <i>F</i> <sup>2</sup> )            | 1.087                                                             |
| final <i>R</i> indices [ <i>I</i> > 2 $\sigma$ ( <i>I</i> )] | <i>R</i> <sub>1</sub> = 0.0391, <i>wR</i> <sub>2</sub> = 0.1132   |
| final <i>R</i> indices (all data)                            | <i>R</i> <sub>1</sub> = 0.0486, <i>wR</i> <sub>2</sub> = 0.1239   |

**Table S44.** Atomic Coordinates and Equivalent Isotropic Displacement Parameters ( $\text{\AA}^2$ ) for [Fe(TPP)(NO)] at 273 K, crystal 4<sup>a</sup>

| atom  | <i>x</i>    | <i>y</i>    | <i>z</i>    | <i>U</i> (eq) |
|-------|-------------|-------------|-------------|---------------|
| Fe(1) | 0.5000      | 0.5000      | 0.02458(14) | 0.0458(5)     |
| N(1)  | 0.35686(13) | 0.53668(13) | 0.0000      | 0.0489(4)     |
| N(2)  | 0.5000      | 0.5000      | 0.1998(6)   | 0.0494(11)    |
| O(1)  | 0.516(6)    | 0.4625(10)  | 0.2967(10)  | 0.095(15)     |
| C(a1) | 0.27652(16) | 0.47339(17) | 0.0000      | 0.0513(5)     |
| C(b1) | 0.18567(18) | 0.52908(18) | 0.0000      | 0.0617(6)     |
| C(b2) | 0.21027(17) | 0.62567(19) | 0.0000      | 0.0610(6)     |
| C(a2) | 0.31728(16) | 0.63098(17) | 0.0000      | 0.0520(5)     |
| C(m1) | 0.37002(17) | 0.71920(16) | 0.0000      | 0.0511(5)     |
| C(10) | 0.31341(16) | 0.81527(16) | 0.0000      | 0.0535(5)     |
| C(11) | 0.28725(18) | 0.86012(15) | 0.1208(2)   | 0.0770(6)     |
| C(12) | 0.2335(2)   | 0.94844(16) | 0.1204(3)   | 0.0857(7)     |
| C(13) | 0.2066(2)   | 0.99164(18) | 0.0000      | 0.0730(7)     |

<sup>a</sup>*U*(eq) is defined as one third of the trace of the orthogonalized  $\mathbf{U}_{ij}$  tensor. The estimated standard deviations of the least significant digits are given in parentheses.

**Table S45.** Bond Lengths for [Fe(TPP)(NO)] at 273 K, crystal 4<sup>a</sup>

| bond          | length (Å) | bond          | length (Å) |
|---------------|------------|---------------|------------|
| Fe(1)–Fe(1)#1 | 0.478(3)   | C(a1)–C(m1#3) | 1.388(3)   |
| Fe(1)–N(2)    | 1.702(5)   | C(a1)–C(b1)   | 1.430(3)   |
| Fe(1)–N(1)#2  | 1.9966(18) | C(b1)–C(b2)   | 1.337(4)   |
| Fe(1)–N(1)    | 1.9966(18) | C(b1)–H(b1)   | 0.9300     |
| Fe(1)–N(1)#1  | 1.9966(18) | C(b2)–C(a2)   | 1.437(3)   |
| Fe(1)–N(1)#3  | 1.9966(18) | C(b2)–H(b2)   | 0.9300     |
| Fe(1)–N(2)#1  | 2.180(6)   | C(a2)–C(m1)   | 1.379(3)   |
| N(1)–C(a2)    | 1.372(3)   | C(m1)–C(a1#2) | 1.388(3)   |
| N(1)–C(a1)    | 1.372(3)   | C(m1)–C(10)   | 1.496(3)   |
| N(1)–Fe(1)#1  | 1.9966(18) | C(10)–C(11)#6 | 1.364(2)   |
| N(2)–O(1)#3   | 1.088(18)  | C(10)–C(11)   | 1.364(2)   |
| N(2)–O(1)#4   | 1.088(18)  | C(11)–C(12)   | 1.387(3)   |
| N(2)–O(1)     | 1.088(18)  | C(11)–H(11)   | 0.9300     |
| N(2)–O(1)#5   | 1.088(18)  | C(12)–C(13)   | 1.354(3)   |
| N(2)–Fe(1)#1  | 2.180(6)   | C(12)–H(12)   | 0.9300     |
| O(1)–O(1)#3   | 0.77(4)    | C(13)–C(12)#6 | 1.354(3)   |
| O(1)–O(1)#5   | 0.77(4)    | C(13)–H(13)   | 0.9300     |
| O(1)–O(1)#4   | 1.09(6)    |               |            |

<sup>a</sup>The estimated standard deviations of the least significant digits are given in parentheses.

**Table S46.** Bond Angles for [Fe(TPP)(NO)] at 273 K, crystal 4<sup>a</sup>

| angle                | degree     | angle               | degree     |
|----------------------|------------|---------------------|------------|
| Fe(1)#1–Fe(1)–N(2)   | 180.000(2) | O(1)#4–N(2)–Fe(1)#1 | 149.9(13)  |
| Fe(1)#1–Fe(1)–N(1)#2 | 83.13(4)   | O(1)–N(2)–Fe(1)#1   | 149.9(13)  |
| N(2)–Fe(1)–N(1)#2    | 96.87(4)   | O(1)#5–N(2)–Fe(1)#1 | 149.9(13)  |
| Fe(1)#1–Fe(1)–N(1)   | 83.13(4)   | Fe(1)–N(2)–Fe(1)#1  | 0.0        |
| N(2)–Fe(1)–N(1)      | 96.87(4)   | O(1)#3–O(1)–O(1)#5  | 90.00(3)   |
| N(1)#2–Fe(1)–N(1)    | 89.180(10) | O(1)#3–O(1)–N(2)    | 69.3(9)    |
| Fe(1)#1–Fe(1)–N(1)#1 | 83.13(4)   | O(1)#5–O(1)–N(2)    | 69.3(8)    |
| N(2)–Fe(1)–N(1)#1    | 96.87(4)   | O(1)#3–O(1)–O(1)#4  | 45.00(3)   |
| N(1)#2–Fe(1)–N(1)#1  | 89.180(10) | O(1)#5–O(1)–O(1)#4  | 45.000(12) |
| N(1)–Fe(1)–N(1)#1    | 166.26(8)  | N(2)–O(1)–O(1)#4    | 59.9(13)   |
| Fe(1)#1–Fe(1)–N(1)#3 | 83.13(4)   | N(1)–C(a1)–C(m1)#3  | 125.86(19) |
| N(2)–Fe(1)–N(1)#3    | 96.87(4)   | N(1)–C(a1)–C(b1)    | 110.3(2)   |
| N(1)#2–Fe(1)–N(1)#3  | 166.26(8)  | C(m1)#3–C(a1)–C(b1) | 123.9(2)   |
| N(1)–Fe(1)–N(1)#3    | 89.180(10) | C(b2)–C(b1)–C(a1)   | 107.2(2)   |
| N(1)#1–Fe(1)–N(1)#3  | 89.180(10) | C(b2)–C(b1)–H(b1)   | 126.4      |
| Fe(1)#1–Fe(1)–N(2)#1 | 0.000(1)   | C(a1)–C(b1)–H(b1)   | 126.4      |
| N(2)–Fe(1)–N(2)#1    | 180.000(1) | C(b1)–C(b2)–C(a2)   | 107.1(2)   |
| N(1)#2–Fe(1)–N(2)#1  | 83.13(4)   | C(b1)–C(b2)–H(b2)   | 126.4      |
| N(1)–Fe(1)–N(2)#1    | 83.13(4)   | C(a2)–C(b2)–H(b2)   | 126.4      |
| N(1)#1–Fe(1)–N(2)#1  | 83.13(4)   | N(1)–C(a2)–C(m1)    | 126.4(2)   |
| N(1)#3–Fe(1)–N(2)#1  | 83.13(4)   | N(1)–C(a2)–C(b2)    | 109.9(2)   |
| C(a2)–N(1)–C(a1)     | 105.46(17) | C(m1)–C(a2)–C(b2)   | 123.7(2)   |
| C(a2)–N(1)–Fe(1)     | 126.83(14) | C(a2)–C(m1)–C(a1)#2 | 123.2(2)   |
| C(a1)–N(1)–Fe(1)     | 127.08(14) | C(a2)–C(m1)–C(10)   | 118.6(2)   |
| C(a2)–N(1)–Fe(1)#1   | 126.83(14) | C(a1)#2–C(m1)–C(10) | 118.13(19) |
| C(a1)–N(1)–Fe(1)#1   | 127.08(14) | C(11)#6–C(10)–C(11) | 118.6(2)   |
| Fe(1)–N(1)–Fe(1)#1   | 13.74(8)   | C(11)#6–C(10)–C(m1) | 120.70(11) |
| O(1)#3–N(2)–O(1)#4   | 41.5(17)   | C(11)–C(10)–C(m1)   | 120.70(11) |
| O(1)#3–N(2)–O(1)     | 41.5(17)   | C(10)–C(11)–C(12)   | 120.53(19) |
| O(1)#4–N(2)–O(1)     | 60(3)      | C(10)–C(11)–H(11)   | 119.7      |
| O(1)#3–N(2)–O(1)#5   | 60(3)      | C(12)–C(11)–H(11)   | 119.7      |
| O(1)#4–N(2)–O(1)#5   | 41.5(17)   | C(13)–C(12)–C(11)   | 120.4(2)   |
| O(1)–N(2)–O(1)#5     | 41.5(17)   | C(13)–C(12)–H(12)   | 119.8      |
| O(1)#3–N(2)–Fe(1)    | 149.9(13)  | C(11)–C(12)–H(12)   | 119.8      |

**Table S46.** Continued

| angle               | degree    | angle               | degree   |
|---------------------|-----------|---------------------|----------|
| O(1)#4–N(2)–Fe(1)   | 149.9(13) | C(12)#6–C(13)–C(12) | 119.4(2) |
| O(1)–N(2)–Fe(1)     | 149.9(13) | C(12)#6–C(13)–H(13) | 120.3    |
| O(1)#5–N(2)–Fe(1)   | 149.9(13) | C(12)–C(13)–H(13)   | 120.3    |
| O(1)#3–N(2)–Fe(1)#1 | 149.9(13) |                     |          |

<sup>a</sup>The estimated standard deviations of the least significant digits are given in parentheses.

**Table S47.** Anisotropic Displacement Parameters ( $\text{\AA}^2$ ) for [Fe(TPP)(NO)] at 273 K, crystal 4<sup>a</sup>

| atom  | $U_{11}$   | $U_{22}$   | $U_{33}$   | $U_{23}$    | $U_{13}$    | $U_{12}$   |
|-------|------------|------------|------------|-------------|-------------|------------|
| Fe(1) | 0.0429(3)  | 0.0429(3)  | 0.0515(13) | 0.000       | 0.000       | 0.000      |
| N(1)  | 0.0471(9)  | 0.0464(9)  | 0.0532(9)  | 0.000       | 0.000       | 0.0005(6)  |
| N(2)  | 0.0456(15) | 0.0456(15) | 0.057(3)   | 0.000       | 0.000       | 0.000      |
| O(1)  | 0.15(4)    | 0.077(7)   | 0.061(4)   | 0.025(8)    | -0.036(17)  | -0.023(18) |
| C(a1) | 0.0461(10) | 0.0535(11) | 0.0544(11) | 0.000       | 0.000       | -0.0002(8) |
| C(b1) | 0.0462(11) | 0.0591(13) | 0.0799(15) | 0.000       | 0.000       | 0.0009(9)  |
| C(b2) | 0.0476(11) | 0.0556(12) | 0.0798(15) | 0.000       | 0.000       | 0.0054(9)  |
| C(a2) | 0.0479(11) | 0.0524(11) | 0.0557(11) | 0.000       | 0.000       | 0.0040(9)  |
| C(m1) | 0.0532(11) | 0.0486(11) | 0.0515(10) | 0.000       | 0.000       | 0.0058(9)  |
| C(10) | 0.0500(11) | 0.0455(10) | 0.0649(12) | 0.000       | 0.000       | 0.0025(8)  |
| C(11) | 0.0974(15) | 0.0696(11) | 0.0640(10) | -0.0043(9)  | -0.0019(10) | 0.0239(10) |
| C(12) | 0.0977(16) | 0.0686(12) | 0.0909(15) | -0.0196(10) | 0.0041(12)  | 0.0212(11) |
| C(13) | 0.0612(14) | 0.0450(12) | 0.113(2)   | 0.000       | 0.000       | 0.0051(10) |

<sup>a</sup>The estimated standard deviations of the least significant digits are given in parentheses. The anisotropic displacement factor exponent takes the form:  $-2 \pi [h^2 U_{11} + \dots + 2 h k a^* b^* U_{12}]$ .

**Table S48.** Hydrogen Atom Coordinates and Equivalent Isotropic Displacement Parameters ( $\text{\AA}^2$ ) for  $[\text{Fe}(\text{TPP})(\text{NO})]$  at 273 K, crystal 4<sup>a</sup>

| atom  | <i>x</i> | <i>y</i> | <i>z</i> | <i>U</i> (eq) |
|-------|----------|----------|----------|---------------|
| H(b1) | 0.1214   | 0.5030   | 0.0000   | 0.074         |
| H(b2) | 0.1664   | 0.6793   | 0.0000   | 0.073         |
| H(11) | 0.3056   | 0.8312   | 0.2040   | 0.092         |
| H(12) | 0.2158   | 0.9782   | 0.2033   | 0.103         |
| H(13) | 0.1699   | 1.0505   | 0.0000   | 0.088         |

<sup>a</sup>*U*(eq) is defined as one third of the trace of the orthogonalized  $\mathbf{U}_{ij}$  tensor the estimated standard deviations of the least significant digits are given in parentheses.



## Supporting Information

**Table S49.** Complete Crystallographic Details for [Fe(TPP)(NO)] at 290 K, crystal 2

|                                                              |                                                                   |
|--------------------------------------------------------------|-------------------------------------------------------------------|
| formula                                                      | C <sub>44</sub> H <sub>28</sub> FeN <sub>5</sub> O                |
| FW, amu                                                      | 698.56                                                            |
| <i>a</i> , Å                                                 | 13.4466(3)                                                        |
| <i>b</i> , Å                                                 | 13.4466(3)                                                        |
| <i>c</i> , Å                                                 | 9.7498(5)                                                         |
| $\beta$ , deg                                                | 90                                                                |
| <i>V</i> , Å <sup>3</sup>                                    | 1762.87(11)                                                       |
| space group                                                  | <i>I4/m</i>                                                       |
| <i>Z</i>                                                     | 2                                                                 |
| D <sub>c</sub> , g/cm <sup>3</sup>                           | 1.316                                                             |
| F(000)                                                       | 722.                                                              |
| $\mu$ , mm <sup>-1</sup>                                     | 0.470                                                             |
| crystal dimensions, mm                                       | 0.21 × 0.20 × 0.05                                                |
| radiation                                                    | MoK $\alpha$ , $\bar{\lambda}$ = 0.71073 Å                        |
| temperature, K                                               | 100(2)                                                            |
| diffractometer                                               | Bruker Apex CCD                                                   |
| $\theta$ range for collected data, deg                       | 2.14–28.23                                                        |
| index range                                                  | –17 ≤ <i>h</i> ≤ 17<br>–17 ≤ <i>k</i> ≤ 17<br>–12 ≤ <i>l</i> ≤ 12 |
| total data collected                                         | 33834                                                             |
| absorption correction                                        | Semi-empirical fromequiv                                          |
| relative transmission coefficients (I)                       | 0.9792 and 0.9090                                                 |
| unique data                                                  | 1155 ( <i>R</i> <sub>int</sub> = 0.0310)                          |
| unique observed data [ <i>I</i> > 2 $\sigma$ ( <i>I</i> )]   | 973                                                               |
| refinement method                                            | Full-matrix least-squares on <i>F</i> <sup>2</sup>                |
| data/restraints/parameters                                   | 1155/0/83                                                         |
| goodness-of-fit (pased on <i>F</i> <sup>2</sup> )            | 1.077                                                             |
| final <i>R</i> indices [ <i>I</i> > 2 $\sigma$ ( <i>I</i> )] | <i>R</i> <sub>1</sub> = 0.0340, <i>wR</i> <sub>2</sub> = 0.0996   |
| final <i>R</i> indices (all data)                            | <i>R</i> <sub>1</sub> = 0.0419, <i>wR</i> <sub>2</sub> = 0.1077   |

**Table S50.** Atomic Coordinates and Equivalent Isotropic Displacement Parameters ( $\text{\AA}^2$ ) for [Fe(TPP)(NO)] at 290 K, crystal 2<sup>a</sup>

| atom  | <i>x</i>    | <i>y</i>    | <i>z</i>     | <i>U</i> (eq) |
|-------|-------------|-------------|--------------|---------------|
| Fe(1) | 0.5000      | 0.5000      | 0.02351(16)  | 0.0457(5)     |
| N(1)  | 0.46314(11) | 0.35716(12) | 0.0000       | 0.0499(4)     |
| C(m1) | 0.28062(14) | 0.37030(15) | 0.0000       | 0.0522(4)     |
| C(a1) | 0.52642(15) | 0.27656(14) | 0.0000       | 0.0524(4)     |
| C(a2) | 0.36874(14) | 0.31738(14) | 0.0000       | 0.0527(4)     |
| C(b1) | 0.47062(16) | 0.18593(15) | 0.0000       | 0.0632(5)     |
| C(b2) | 0.37407(16) | 0.21065(15) | 0.0000       | 0.0625(5)     |
| C(10) | 0.18473(14) | 0.31364(14) | 0.0000       | 0.0547(5)     |
| C(11) | 0.13974(14) | 0.28742(16) | -0.12077(19) | 0.0791(5)     |
| C(12) | 0.05158(14) | 0.23357(17) | -0.1201(2)   | 0.0877(6)     |
| C(13) | 0.00852(16) | 0.20639(18) | 0.0000       | 0.0755(7)     |
| N(2)  | 0.5000      | 0.5000      | 0.2004(5)    | 0.0470(9)     |
| O(1)  | 0.512(9)    | 0.4626(13)  | 0.2978(9)    | 0.10(2)       |

<sup>a</sup>*U*(eq) is defined as one third of the trace of the orthogonalized  $\mathbf{U}_{ij}$  tensor. The estimated standard deviations of the least significant digits are given in parentheses.

**Table S51.** Bond Lengths for [Fe(TPP)(NO)] at 290 K, crystal 2<sup>a</sup>

| bond          | length (Å) | bond           | length (Å) |
|---------------|------------|----------------|------------|
| Fe(1)–N(2)    | 1.725(5)   | C(b1)–H(b1)    | 0.9300     |
| Fe(1)–N(1)    | 1.9968(16) | C(b2)–H(b2)    | 0.9300     |
| Fe(1)–N(2)#1) | 2.183(5)   | C(10)–C(11)    | 1.370(2)   |
| N(1)–C(a2)    | 1.378(2)   | C(10)–C(11)#4) | 1.370(2)   |
| N(1)–C(a1)    | 1.378(2)   | C(11)–C(12)    | 1.389(2)   |
| N(1)–Fe(1)#1) | 1.9969(16) | C(11)–H(11)    | 0.9300     |
| C(m1)–C(a2)   | 1.382(3)   | C(12)–C(13)    | 1.356(3)   |
| C(m1)–C(a1#2) | 1.390(3)   | C(12)–H(12)    | 0.9300     |
| C(m1)–C(10)   | 1.498(3)   | C(13)–C(12)#4) | 1.356(3)   |
| C(a1)–C(m1#3) | 1.390(3)   | C(13)–H(13)    | 0.9300     |
| C(a1)–C(b1)   | 1.431(3)   | N(2)–O(1)      | 1.09(3)    |
| C(a2)–C(b2)   | 1.437(3)   | N(2)–Fe(1)#1)  | 2.183(5)   |
| C(b1)–C(b2)   | 1.340(3)   |                |            |

<sup>a</sup>The estimated standard deviations of the least significant digits are given in parentheses.

**Table S52.** Bond Angles for [Fe(TPP)(NO)] at 290 K, crystal 2<sup>a</sup>

| angle                | degree     | angle               | degree     |
|----------------------|------------|---------------------|------------|
| Fe(1)#1–Fe(1)–N(2)   | 179.997(1) | C(m1)–C(a2)–C(b2)   | 123.85(19) |
| Fe(1)#1–Fe(1)–N(1)#2 | 83.41(5)   | C(b2)–C(b1)–C(a1)   | 107.26(18) |
| N(2)–Fe(1)–N(1)#2    | 96.59(4)   | C(b2)–C(b1)–H(b1)   | 126.4      |
| Fe(1)#1–Fe(1)–N(1)#3 | 83.41(4)   | C(a1)–C(b1)–H(b1)   | 126.4      |
| N(2)–Fe(1)–N(1)#3    | 96.59(4)   | C(b1)–C(b2)–C(a2)   | 107.22(18) |
| N(1)#2–Fe(1)–N(1)#3  | 166.82(9)  | C(b1)–C(b2)–H(b2)   | 126.4      |
| Fe(1)#1–Fe(1)–N(1)#1 | 83.41(4)   | C(a2)–C(b2)–H(b2)   | 126.4      |
| N(2)–Fe(1)–N(1)#1    | 96.59(4)   | C(11)–C(10)–C(11)#4 | 118.5(2)   |
| N(1)#2–Fe(1)–N(1)#1  | 89.244(10) | C(11)–C(10)–C(m1)   | 120.74(10) |
| N(1)#3–Fe(1)–N(1)#1  | 89.244(10) | C(11)#4–C(10)–C(m1) | 120.74(10) |
| Fe(1)#1–Fe(1)–N(1)   | 83.41(4)   | C(10)–C(11)–C(12)   | 120.45(18) |
| N(2)–Fe(1)–N(1)      | 96.59(4)   | C(10)–C(11)–H(11)   | 119.8      |
| N(1)#2–Fe(1)–N(1)    | 89.246(10) | C(12)–C(11)–H(11)   | 119.8      |
| N(1)#3–Fe(1)–N(1)    | 89.245(10) | C(13)–C(12)–C(11)   | 120.60(19) |
| N(1)#1–Fe(1)–N(1)    | 166.82(9)  | C(13)–C(12)–H(12)   | 119.7      |
| N(2)–Fe(1)–N(2)#1    | 180.0      | C(11)–C(12)–H(12)   | 119.7      |
| N(1)#2–Fe(1)–N(2)#1  | 83.41(4)   | C(12)#4–C(13)–C(12) | 119.4(2)   |
| N(1)#3–Fe(1)–N(2)#1  | 83.41(4)   | C(12)#4–C(13)–H(13) | 120.3      |
| N(1)#1–Fe(1)–N(2)#1  | 83.41(4)   | C(12)–C(13)–H(13)   | 120.3      |
| N(1)–Fe(1)–N(2)#1    | 83.41(4)   | O(1)#5–N(2)–O(1)#3  | 58(4)      |
| C(a2)–N(1)–C(a1)     | 105.29(15) | O(1)–N(2)–O(1)#6    | 58(4)      |
| C(a2)–N(1)–Fe(1)     | 127.03(13) | O(1)–N(2)–Fe(1)     | 151(2)     |
| C(a1)–N(1)–Fe(1)     | 127.11(13) | O(1)#5–N(2)–Fe(1)   | 151(2)     |
| C(a2)–N(1)–Fe(1)#1   | 127.03(13) | O(1)#3–N(2)–Fe(1)   | 151(2)     |
| C(a1)–N(1)–Fe(1)#1   | 127.11(13) | O(1)#6–N(2)–Fe(1)   | 151(2)     |
| C(a2)–C(m1)–C(a1)#2  | 123.24(18) | O(1)–N(2)–Fe(1)#1   | 151(2)     |
| C(a2)–C(m1)–C(10)    | 118.43(17) | O(1)#5–N(2)–Fe(1)#1 | 151(2)     |
| C(a1)#2–C(m1)–C(10)  | 118.33(17) | O(1)#3–N(2)–Fe(1)#1 | 151(2)     |
| N(1)–C(a1)–C(m1)#3   | 125.88(17) | O(1)#6–N(2)–Fe(1)#1 | 151(2)     |
| N(1)–C(a1)–C(b1)     | 110.24(18) | O(1)#5–O(1)–N(2)    | 69.9(15)   |
| C(m1)#3–C(a1)–C(b1)  | 123.87(18) | O(1)#3–O(1)–N(2)    | 69.9(14)   |
| N(1)–C(a2)–C(m1)     | 126.17(17) | O(1)#6–O(1)–N(2)    | 61(2)      |
| N(1)–C(a2)–C(b2)     | 109.98(18) |                     |            |

<sup>a</sup>The estimated standard deviations of the least significant digits are given in parentheses.

**Table S53.** Anisotropic Displacement Parameters ( $\text{\AA}^2$ ) for  $[\text{Fe}(\text{TPP})(\text{NO})]$  at 290 K, crystal 2<sup>a</sup>

| atom  | $U_{11}$   | $U_{22}$   | $U_{33}$   | $U_{23}$    | $U_{13}$    | $U_{12}$   |
|-------|------------|------------|------------|-------------|-------------|------------|
| Fe(1) | 0.0421(2)  | 0.0421(2)  | 0.0530(13) | 0.000       | 0.000       | 0.000      |
| N(1)  | 0.0457(8)  | 0.0464(8)  | 0.0575(9)  | 0.000       | 0.000       | -0.0007(6) |
| C(m1) | 0.0473(9)  | 0.0529(10) | 0.0564(10) | 0.000       | 0.000       | -0.0048(7) |
| C(a1) | 0.0531(10) | 0.0449(9)  | 0.0592(10) | 0.000       | 0.000       | 0.0009(7)  |
| C(a2) | 0.0503(10) | 0.0478(9)  | 0.0599(11) | 0.000       | 0.000       | -0.0050(7) |
| C(b1) | 0.0591(11) | 0.0448(10) | 0.0858(14) | 0.000       | 0.000       | -0.0006(8) |
| C(b2) | 0.0555(11) | 0.0473(10) | 0.0847(14) | 0.000       | 0.000       | -0.0059(8) |
| C(10) | 0.0448(9)  | 0.0505(10) | 0.0688(12) | 0.000       | 0.000       | -0.0018(7) |
| C(11) | 0.0688(10) | 0.0979(13) | 0.0706(10) | 0.0022(9)   | -0.0051(8)  | -0.0238(9) |
| C(12) | 0.0678(10) | 0.0978(14) | 0.0975(14) | -0.0039(11) | -0.0207(10) | -0.0216(9) |
| C(13) | 0.0447(10) | 0.0603(12) | 0.121(2)   | 0.000       | 0.000       | -0.0060(9) |
| N(2)  | 0.0422(12) | 0.0422(12) | 0.057(3)   | 0.000       | 0.000       | 0.000      |
| O(1)  | 0.17(6)    | 0.071(6)   | 0.062(4)   | 0.022(9)    | -0.031(17)  | -0.03(2)   |

<sup>a</sup>The estimated standard deviations of the least significant digits are given in parentheses. The anisotropic displacement factor exponent takes the form:  $-2 \pi [\text{h}^2 U_{11} + \dots + 2 \text{h k a}^* \text{b}^* U_{12}]$ .

**Table S54.** Hydrogen Atom Coordinates and Equivalent Isotropic Displacement Parameters ( $\text{\AA}^2$ ) for  $[\text{Fe}(\text{TPP})(\text{NO})]$  at 290 K, crystal 2<sup>a</sup>

| atom  | $x$     | $y$    | $z$     | $U(\text{eq})$ |
|-------|---------|--------|---------|----------------|
| H(b1) | 0.4965  | 0.1218 | 0.0000  | 0.076          |
| H(b2) | 0.3205  | 0.1669 | 0.0000  | 0.075          |
| H(11) | 0.1684  | 0.3058 | -0.2038 | 0.095          |
| H(12) | 0.0218  | 0.2160 | -0.2027 | 0.105          |
| H(13) | -0.0500 | 0.1695 | 0.0000  | 0.091          |

<sup>a</sup> $U(\text{eq})$  is defined as one third of the trace of the orthogonalized  $\mathbf{U}_{ij}$  tensor the estimated standard deviations of the least significant digits are given in parentheses.

## Supporting Information

**Table S55.** Complete Crystallographic Details for [Fe(TPP)(NO)] at 293 K, crystal 1

|                                                              |                                                                   |
|--------------------------------------------------------------|-------------------------------------------------------------------|
| formula                                                      | C <sub>44</sub> H <sub>28</sub> FeN <sub>5</sub> O                |
| FW, amu                                                      | 698.56                                                            |
| <i>a</i> , Å                                                 | 13.4748(12)                                                       |
| <i>b</i> , Å                                                 | 13.4748(12)                                                       |
| <i>c</i> , Å                                                 | 9.7686(18)                                                        |
| $\beta$ , deg                                                | 90                                                                |
| <i>V</i> , Å <sup>3</sup>                                    | 1773.7(4)                                                         |
| space group                                                  | <i>I4/m</i>                                                       |
| <i>Z</i>                                                     | 2                                                                 |
| D <sub>c</sub> , g/cm <sup>3</sup>                           | 1.308                                                             |
| F(000)                                                       | 722.                                                              |
| $\mu$ , mm <sup>-1</sup>                                     | 0.467                                                             |
| crystal dimensions, mm                                       | 0.21 × 0.17 × 0.08                                                |
| radiation                                                    | MoK $\alpha$ , $\bar{\lambda}$ = 0.71073 Å                        |
| temperature, K                                               | 293(2)                                                            |
| diffractometer                                               | Bruker SMART Apex II                                              |
| $\theta$ range for collected data, deg                       | 3.02–27.48                                                        |
| index range                                                  | –17 ≤ <i>h</i> ≤ 17<br>–17 ≤ <i>k</i> ≤ 17<br>–12 ≤ <i>l</i> ≤ 12 |
| total data collected                                         | 9839                                                              |
| absorption correction                                        | Semi-empirical fromequiv                                          |
| relative transmission coefficients (I)                       | 0.9636 and 0.9082                                                 |
| unique data                                                  | 1081 ( <i>R</i> <sub>int</sub> = 0.0308)                          |
| unique observed data [ <i>I</i> > 2 $\sigma$ ( <i>I</i> )]   | 842                                                               |
| refinement method                                            | Full-matrix least-squares on <i>F</i> <sup>2</sup>                |
| data/restraints/parameters                                   | 1081/0/82                                                         |
| goodness-of-fit (pased on <i>F</i> <sup>2</sup> )            | 1.071                                                             |
| final <i>R</i> indices [ <i>I</i> > 2 $\sigma$ ( <i>I</i> )] | <i>R</i> <sub>1</sub> = 0.0351, <i>wR</i> <sub>2</sub> = 0.0989   |
| final <i>R</i> indices (all data)                            | <i>R</i> <sub>1</sub> = 0.0477, <i>wR</i> <sub>2</sub> = 0.1069   |

**Table S56.** Atomic Coordinates and Equivalent Isotropic Displacement Parameters ( $\text{\AA}^2$ ) for [Fe(TPP)(NO)] at 293 K, crystal 1<sup>a</sup>

| atom  | <i>x</i>    | <i>y</i>    | <i>z</i>   | <i>U</i> (eq) |
|-------|-------------|-------------|------------|---------------|
| Fe(1) | 0.5000      | 0.5000      | 0.0235(3)  | 0.0542(7)     |
| N(1)  | 0.35716(13) | 0.46326(12) | 0.0000     | 0.0573(4)     |
| C(m1) | 0.37029(16) | 0.28062(15) | 0.0000     | 0.0596(5)     |
| C(a1) | 0.27646(15) | 0.52653(16) | 0.0000     | 0.0609(5)     |
| C(a2) | 0.31742(15) | 0.36876(16) | 0.0000     | 0.0603(5)     |
| C(b1) | 0.18617(17) | 0.47046(18) | 0.0000     | 0.0716(6)     |
| C(b2) | 0.21081(17) | 0.37432(18) | 0.0000     | 0.0711(6)     |
| C(10) | 0.31374(16) | 0.18469(16) | 0.0000     | 0.0627(5)     |
| C(11) | 0.28741(17) | 0.13999(15) | 0.1203(2)  | 0.0872(6)     |
| C(12) | 0.23382(18) | 0.05178(15) | 0.1197(3)  | 0.0956(7)     |
| C(13) | 0.2067(2)   | 0.00887(18) | 0.0000     | 0.0845(8)     |
| N(2)  | 0.5000      | 0.5000      | 0.1995(6)  | 0.0568(11)    |
| O(1)  | 0.472(4)    | 0.469(4)    | 0.2972(10) | 0.090(7)      |

<sup>a</sup>*U*(eq) is defined as one third of the trace of the orthogonalized  $\mathbf{U}_{ij}$  tensor. The estimated standard deviations of the least significant digits are given in parentheses.



**Table S57.** Bond Lengths for [Fe(TPP)(NO)] at 293 K, crystal 1<sup>a</sup>

| bond          | length (Å) | bond          | length (Å) |
|---------------|------------|---------------|------------|
| Fe(1)–Fe(1)#1 | 0.459(5)   | C(b1)–H(b1)   | 0.9300     |
| Fe(1)–N(2)    | 1.720(6)   | C(b2)–H(b2)   | 0.9300     |
| Fe(1)–N(1)#1  | 2.0005(17) | C(10)–C(11)#4 | 1.367(2)   |
| Fe(1)–N(2)#1  | 2.179(7)   | C(10)–C(11)   | 1.367(2)   |
| N(1)–C(a2)    | 1.381(3)   | C(11)–C(12)   | 1.391(3)   |
| N(1)–C(a1)    | 1.382(3)   | C(11)–H(11)   | 0.9300     |
| N(1)–Fe(1)#1  | 2.0005(17) | C(12)–C(13)   | 1.355(3)   |
| C(m1)–C(a2)   | 1.385(3)   | C(12)–H(12)   | 0.9300     |
| C(m1)–C(a1#2) | 1.391(3)   | C(13)–C(12)#4 | 1.355(3)   |
| C(m1)–C(10)   | 1.500(3)   | C(13)–H(13)   | 0.9300     |
| C(a1)–C(m1#3) | 1.391(3)   | N(2)–O(1)     | 1.107(11)  |
| C(a1)–C(b1)   | 1.432(3)   | N(2)–Fe(1)#1  | 2.179(7)   |
| C(a2)–C(b2)   | 1.438(3)   | O(1)–O(1)#5   | 0.795(19)  |
| C(b1)–C(b2)   | 1.337(3)   |               |            |

<sup>a</sup>The estimated standard deviations of the least significant digits are given in parentheses.

**Table S58.** Bond Angles for [Fe(TPP)(NO)] at 293 K, crystal 1<sup>a</sup>

| angle                | degree     | angle               | degree     |
|----------------------|------------|---------------------|------------|
| Fe(1)#1–Fe(1)–N(2)   | 179.999(2) | C(b2)–C(b1)–C(a1)   | 107.46(19) |
| Fe(1)#1–Fe(1)–N(1)   | 83.42(8)   | C(b2)–C(b1)–H(b1)   | 126.3      |
| N(2)–Fe(1)–N(1)      | 96.58(8)   | C(a1)–C(b1)–H(b1)   | 126.3      |
| Fe(1)#1–Fe(1)–N(1)#2 | 83.42(8)   | C(b1)–C(b2)–C(a2)   | 107.36(19) |
| N(2)–Fe(1)–N(1)#2    | 96.58(8)   | C(b1)–C(b2)–H(b2)   | 126.3      |
| N(1)–Fe(1)–N(1)#2    | 89.247(18) | C(a2)–C(b2)–H(b2)   | 126.3      |
| Fe(1)#1–Fe(1)–N(1)#3 | 83.42(8)   | C(11)#4–C(10)–C(11) | 118.5(2)   |
| N(2)–Fe(1)–N(1)#3    | 96.58(8)   | C(11)#4–C(10)–C(m1) | 120.76(11) |
| N(1)–Fe(1)–N(1)#3    | 89.248(18) | C(11)–C(10)–C(m1)   | 120.76(11) |
| N(1)#2–Fe(1)–N(1)#3  | 166.84(16) | C(10)–C(11)–C(12)   | 120.5(2)   |
| Fe(1)#1–Fe(1)–N(1)#1 | 83.42(8)   | C(10)–C(11)–H(11)   | 119.7      |
| N(2)–Fe(1)–N(1)#1    | 96.58(8)   | C(12)–C(11)–H(11)   | 119.7      |
| N(1)–Fe(1)–N(1)#1    | 166.84(16) | C(13)–C(12)–C(11)   | 120.6(2)   |
| N(1)#2–Fe(1)–N(1)#1  | 89.247(18) | C(13)–C(12)–H(12)   | 119.7      |
| N(1)#3–Fe(1)–N(1)#1  | 89.247(18) | C(11)–C(12)–H(12)   | 119.7      |
| Fe(1)#1–Fe(1)–N(2)#1 | 0.001(1)   | C(12)–C(13)–C(12)#4 | 119.3(2)   |
| N(2)–Fe(1)–N(2)#1    | 180.0      | C(12)–C(13)–H(13)   | 120.3      |
| N(1)–Fe(1)–N(2)#1    | 83.42(8)   | C(12)#4–C(13)–H(13) | 120.3      |
| N(1)#2–Fe(1)–N(2)#1  | 83.42(8)   | O(1)#5–N(2)–O(1)#2  | 61.0(14)   |
| N(1)#3–Fe(1)–N(2)#1  | 83.42(8)   | O(1)–N(2)–O(1)#6    | 61.0(14)   |
| N(1)#1–Fe(1)–N(2)#1  | 83.42(8)   | O(1)–N(2)–Fe(1)     | 149.5(7)   |
| C(a2)–N(1)–C(a1)     | 105.29(17) | O(1)#5–N(2)–Fe(1)   | 149.5(7)   |
| C(a2)–N(1)–Fe(1)     | 126.95(14) | O(1)#2–N(2)–Fe(1)   | 149.5(7)   |
| C(a1)–N(1)–Fe(1)     | 127.19(14) | O(1)#6–N(2)–Fe(1)   | 149.5(7)   |
| C(a2)–N(1)–Fe(1)#1   | 126.95(14) | O(1)–N(2)–Fe(1)#1   | 149.5(7)   |
| C(a1)–N(1)–Fe(1)#1   | 127.19(14) | O(1)#5–N(2)–Fe(1)#1 | 149.5(7)   |
| C(a2)–C(m1)–C(a1)#2  | 123.3(2)   | O(1)#2–N(2)–Fe(1)#1 | 149.5(7)   |
| C(a2)–C(m1)–C(10)    | 118.53(19) | O(1)#6–N(2)–Fe(1)#1 | 149.5(7)   |
| C(a1)#2–C(m1)–C(10)  | 118.21(19) | O(1)#5–O(1)–O(1)#2  | 90.01(2)   |
| N(1)–C(a1)–C(m1)#3   | 125.79(19) | O(1)#5–O(1)–N(2)    | 69.0(4)    |
| N(1)–C(a1)–C(b1)     | 110.07(19) | O(1)#2–O(1)–N(2)    | 69.0(5)    |
| C(m1)#3–C(a1)–C(b1)  | 124.1(2)   | O(1)#5–O(1)–O(1)#6  | 45.003(8)  |
| N(1)–C(a2)–C(m1)     | 126.24(19) | O(1)#2–O(1)–O(1)#6  | 45.003(14) |
| N(1)–C(a2)–C(b2)     | 109.83(19) | N(2)–O(1)–O(1)#6    | 59.5(7)    |

**Table S58.** Continued

| angle             | degree   | angle | degree |
|-------------------|----------|-------|--------|
| C(m1)–C(a2)–C(b2) | 123.9(2) |       |        |

<sup>a</sup>The estimated standard deviations of the least significant digits are given in parentheses.

**Table S59.** Anisotropic Displacement Parameters ( $\text{\AA}^2$ ) for  $[\text{Fe}(\text{TPP})(\text{NO})]$  at 293 K, crystal 1<sup>a</sup>

| atom  | $U_{11}$   | $U_{22}$   | $U_{33}$   | $U_{23}$   | $U_{13}$    | $U_{12}$    |
|-------|------------|------------|------------|------------|-------------|-------------|
| Fe(1) | 0.0475(3)  | 0.0475(3)  | 0.068(2)   | 0.000      | 0.000       | 0.000       |
| N(1)  | 0.0521(9)  | 0.0511(9)  | 0.0688(11) | 0.000      | 0.000       | -0.0002(7)  |
| C(m1) | 0.0586(11) | 0.0541(11) | 0.0661(12) | 0.000      | 0.000       | -0.0053(9)  |
| C(a1) | 0.0497(11) | 0.0601(12) | 0.0728(14) | 0.000      | 0.000       | 0.0017(8)   |
| C(a2) | 0.0538(11) | 0.0555(11) | 0.0717(13) | 0.000      | 0.000       | -0.0049(9)  |
| C(b1) | 0.0508(11) | 0.0660(13) | 0.0978(17) | 0.000      | 0.000       | -0.0006(9)  |
| C(b2) | 0.0529(11) | 0.0614(13) | 0.0991(17) | 0.000      | 0.000       | -0.0067(9)  |
| C(10) | 0.0569(11) | 0.0509(11) | 0.0803(15) | 0.000      | 0.000       | -0.0015(8)  |
| C(11) | 0.1044(14) | 0.0754(11) | 0.0818(12) | 0.0060(10) | -0.0015(11) | -0.0238(10) |
| C(12) | 0.1048(15) | 0.0740(12) | 0.1081(17) | 0.0216(11) | 0.0035(12)  | -0.0227(10) |
| C(13) | 0.0670(14) | 0.0514(12) | 0.135(3)   | 0.000      | 0.000       | -0.0063(10) |
| N(2)  | 0.0496(15) | 0.0496(15) | 0.071(3)   | 0.000      | 0.000       | 0.000       |
| O(1)  | 0.080(17)  | 0.11(3)    | 0.080(5)   | 0.025(12)  | 0.003(9)    | 0.000(5)    |

<sup>a</sup>The estimated standard deviations of the least significant digits are given in parentheses. The anisotropic displacement factor exponent takes the form:  $-2 \pi [h^2 U_{11} + \dots + 2 h k a^* b^* U_{12}]$ .

**Table S60.** Hydrogen Atom Coordinates and Equivalent Isotropic Displacement Parameters ( $\text{\AA}^2$ ) for  $[\text{Fe}(\text{TPP})(\text{NO})]$  at 293 K, crystal 1<sup>a</sup>

| atom  | $x$    | $y$     | $z$    | $U(\text{eq})$ |
|-------|--------|---------|--------|----------------|
| H(b1) | 0.1221 | 0.4962  | 0.0000 | 0.086          |
| H(b2) | 0.1671 | 0.3209  | 0.0000 | 0.085          |
| H(11) | 0.3055 | 0.1688  | 0.2031 | 0.105          |
| H(12) | 0.2165 | 0.0220  | 0.2022 | 0.115          |
| H(13) | 0.1697 | -0.0495 | 0.0000 | 0.101          |

<sup>a</sup> $U(\text{eq})$  is defined as one third of the trace of the orthogonalized  $\mathbf{U}_{ij}$  tensor the estimated standard deviations of the least significant digits are given in parentheses.

## Supporting Information

**Table S61.** Complete Crystallographic Details for [Fe(TPP)(NO)] at 293 K, crystal 2

|                                                              |                                                                   |
|--------------------------------------------------------------|-------------------------------------------------------------------|
| formula                                                      | C <sub>44</sub> H <sub>28</sub> FeN <sub>5</sub> O                |
| FW, amu                                                      | 698.56                                                            |
| <i>a</i> , Å                                                 | 13.4502(3)                                                        |
| <i>b</i> , Å                                                 | 13.4502(3)                                                        |
| <i>c</i> , Å                                                 | 9.7533(4)                                                         |
| $\beta$ , deg                                                | 90                                                                |
| <i>V</i> , Å <sup>3</sup>                                    | 1764.45(9)                                                        |
| space group                                                  | <i>I4/m</i>                                                       |
| <i>Z</i>                                                     | 2                                                                 |
| D <sub>c</sub> , g/cm <sup>3</sup>                           | 1.315                                                             |
| F(000)                                                       | 722.                                                              |
| $\mu$ , mm <sup>-1</sup>                                     | 0.470                                                             |
| crystal dimensions, mm                                       | 0.36 × 0.25 × 0.15                                                |
| radiation                                                    | MoK $\alpha$ , $\bar{\lambda}$ = 0.71073 Å                        |
| temperature, K                                               | 293(2)                                                            |
| diffractometer                                               | Bruker Apex CCD                                                   |
| $\theta$ range for collected data, deg                       | 2.14–27.85                                                        |
| index range                                                  | –17 ≤ <i>h</i> ≤ 17<br>–17 ≤ <i>k</i> ≤ 17<br>–12 ≤ <i>l</i> ≤ 12 |
| total data collected                                         | 9687                                                              |
| absorption correction                                        | Semi-empirical fromequiv                                          |
| relative transmission coefficients (I)                       | 0.9320 and 0.8491                                                 |
| unique data                                                  | 1108 ( <i>R</i> <sub>int</sub> = 0.0318)                          |
| unique observed data [ <i>I</i> > 2 $\sigma$ ( <i>I</i> )]   | 881                                                               |
| refinement method                                            | Full-matrix least-squares on <i>F</i> <sup>2</sup>                |
| data/restraints/parameters                                   | 1108/0/83                                                         |
| goodness-of-fit (pased on <i>F</i> <sup>2</sup> )            | 1.064                                                             |
| final <i>R</i> indices [ <i>I</i> > 2 $\sigma$ ( <i>I</i> )] | <i>R</i> <sub>1</sub> = 0.0372, <i>wR</i> <sub>2</sub> = 0.1024   |
| final <i>R</i> indices (all data)                            | <i>R</i> <sub>1</sub> = 0.0497, <i>wR</i> <sub>2</sub> = 0.1115   |

**Table S62.** Atomic Coordinates and Equivalent Isotropic Displacement Parameters ( $\text{\AA}^2$ ) for [Fe(TPP)(NO)] at 293 K, crystal 2<sup>a</sup>

| atom  | <i>x</i>    | <i>y</i>    | <i>z</i>   | <i>U</i> (eq) |
|-------|-------------|-------------|------------|---------------|
| Fe(1) | 0.5000      | 0.5000      | 0.0231(3)  | 0.0481(7)     |
| N(1)  | 0.35723(13) | 0.46306(13) | 0.0000     | 0.0510(4)     |
| C(m1) | 0.37032(16) | 0.28065(15) | 0.0000     | 0.0532(5)     |
| C(a1) | 0.27654(15) | 0.52632(17) | 0.0000     | 0.0540(5)     |
| C(a2) | 0.31748(15) | 0.36872(16) | 0.0000     | 0.0538(5)     |
| C(b1) | 0.18608(17) | 0.47042(18) | 0.0000     | 0.0648(6)     |
| C(b2) | 0.21075(17) | 0.37414(18) | 0.0000     | 0.0640(6)     |
| C(10) | 0.31372(16) | 0.18460(16) | 0.0000     | 0.0559(5)     |
| C(11) | 0.28751(17) | 0.13973(15) | 0.1203(2)  | 0.0802(6)     |
| C(12) | 0.23390(19) | 0.05176(16) | 0.1200(3)  | 0.0894(7)     |
| C(13) | 0.2065(2)   | 0.00859(18) | 0.0000     | 0.0778(8)     |
| N(2)  | 0.5000      | 0.5000      | 0.1998(6)  | 0.0481(11)    |
| O(1)  | 0.478(5)    | 0.464(3)    | 0.2972(10) | 0.084(6)      |

<sup>a</sup>*U*(eq) is defined as one third of the trace of the orthogonalized  $\mathbf{U}_{ij}$  tensor. The estimated standard deviations of the least significant digits are given in parentheses.

**Table S63.** Bond Lengths for [Fe(TPP)(NO)] at 293 K, crystal 2<sup>a</sup>

| bond          | length (Å) | bond          | length (Å) |
|---------------|------------|---------------|------------|
| Fe(1)–Fe(1)#1 | 0.450(5)   | C(b1)–H(b1)   | 0.9300     |
| Fe(1)–N(2)    | 1.724(6)   | C(b2)–H(b2)   | 0.9300     |
| Fe(1)–N(1)#2  | 1.9962(17) | C(10)–C(11)#4 | 1.366(2)   |
| Fe(1)–N(1)#3  | 1.9962(17) | C(10)–C(11)   | 1.366(2)   |
| Fe(1)–N(1)    | 1.9963(17) | C(11)–C(12)   | 1.386(3)   |
| Fe(1)–N(1)#1  | 1.9963(17) | C(11)–H(11)   | 0.9300     |
| Fe(1)–N(2)#1  | 2.174(6)   | C(12)–C(13)   | 1.357(3)   |
| N(1)–C(a2)    | 1.377(3)   | C(12)–H(12)   | 0.9300     |
| N(1)–C(a1)    | 1.379(3)   | C(13)–C(12)#4 | 1.357(3)   |
| N(1)–Fe(1)#1  | 1.9963(17) | C(13)–H(13)   | 0.9300     |
| C(m1)–C(a2)   | 1.381(3)   | N(2)–O(1)#3   | 1.108(11)  |
| C(m1)–C(a1#3) | 1.391(3)   | N(2)–O(1)#5   | 1.108(11)  |
| C(m1)–C(10)   | 1.499(3)   | N(2)–O(1)#6   | 1.108(11)  |
| C(a1)–C(m1#2) | 1.391(3)   | N(2)–O(1)     | 1.108(11)  |
| C(a1)–C(b1)   | 1.430(3)   | N(2)–Fe(1)#1  | 2.174(6)   |
| C(a2)–C(b2)   | 1.437(3)   |               |            |
| C(b1)–C(b2)   | 1.337(3)   |               |            |

<sup>a</sup>The estimated standard deviations of the least significant digits are given in parentheses.



**Table S64.** Bond Angles for [Fe(TPP)(NO)] at 293 K, crystal 2<sup>a</sup>

| angle                | degree     | angle               | degree     |
|----------------------|------------|---------------------|------------|
| Fe(1)#1–Fe(1)–N(2)   | 179.995(2) | C(m1)–C(a2)–C(b2)   | 123.9(2)   |
| Fe(1)#1–Fe(1)–N(1)#2 | 83.53(7)   | C(b2)–C(b1)–C(a1)   | 107.34(19) |
| N(2)–Fe(1)–N(1)#2    | 96.47(7)   | C(b2)–C(b1)–H(b1)   | 126.3      |
| Fe(1)#1–Fe(1)–N(1)#3 | 83.52(7)   | C(a1)–C(b1)–H(b1)   | 126.3      |
| N(2)–Fe(1)–N(1)#3    | 96.47(7)   | C(b1)–C(b2)–C(a2)   | 107.3(2)   |
| N(1)#2–Fe(1)–N(1)#3  | 167.05(15) | C(b1)–C(b2)–H(b2)   | 126.4      |
| Fe(1)#1–Fe(1)–N(1)   | 83.53(8)   | C(a2)–C(b2)–H(b2)   | 126.4      |
| N(2)–Fe(1)–N(1)      | 96.47(7)   | C(11)#4–C(10)–C(11) | 118.5(2)   |
| N(1)#2–Fe(1)–N(1)    | 89.272(17) | C(11)#4–C(10)–C(m1) | 120.77(11) |
| N(1)#3–Fe(1)–N(1)    | 89.271(17) | C(11)–C(10)–C(m1)   | 120.77(11) |
| Fe(1)#1–Fe(1)–N(1)#1 | 83.52(7)   | C(10)–C(11)–C(12)   | 120.6(2)   |
| N(2)–Fe(1)–N(1)#1    | 96.47(7)   | C(10)–C(11)–H(11)   | 119.7      |
| N(1)#2–Fe(1)–N(1)#1  | 89.271(17) | C(12)–C(11)–H(11)   | 119.7      |
| N(1)#3–Fe(1)–N(1)#1  | 89.273(17) | C(13)–C(12)–C(11)   | 120.6(2)   |
| N(1)–Fe(1)–N(1)#1    | 167.05(15) | C(13)–C(12)–H(12)   | 119.7      |
| Fe(1)#1–Fe(1)–N(2)#1 | 0.004(2)   | C(11)–C(12)–H(12)   | 119.7      |
| N(2)–Fe(1)–N(2)#1    | 180.0      | C(12)–C(13)–C(12)#4 | 119.1(2)   |
| N(1)#2–Fe(1)–N(2)#1  | 83.53(7)   | C(12)–C(13)–H(13)   | 120.4      |
| N(1)#3–Fe(1)–N(2)#1  | 83.53(7)   | C(12)#4–C(13)–H(13) | 120.4      |
| N(1)–Fe(1)–N(2)#1    | 83.53(7)   | O(1)#3–N(2)–O(1)#5  | 62.1(13)   |
| N(1)#1–Fe(1)–N(2)#1  | 83.53(7)   | O(1)#6–N(2)–O(1)    | 62.1(13)   |
| C(a2)–N(1)–C(a1)     | 105.25(17) | O(1)#3–N(2)–Fe(1)   | 149.0(6)   |
| C(a2)–N(1)–Fe(1)     | 127.08(14) | O(1)#5–N(2)–Fe(1)   | 149.0(6)   |
| C(a1)–N(1)–Fe(1)     | 127.12(14) | O(1)#6–N(2)–Fe(1)   | 149.0(7)   |
| C(a2)–N(1)–Fe(1)#1   | 127.08(14) | O(1)–N(2)–Fe(1)     | 149.0(6)   |
| C(a1)–N(1)–Fe(1)#1   | 127.12(14) | O(1)#3–N(2)–Fe(1)#1 | 149.0(6)   |
| C(a2)–C(m1)–C(a1)#3  | 123.2(2)   | O(1)#5–N(2)–Fe(1)#1 | 149.0(6)   |
| C(a2)–C(m1)–C(10)    | 118.53(19) | O(1)#6–N(2)–Fe(1)#1 | 149.0(7)   |
| C(a1)#3–C(m1)–C(10)  | 118.23(19) | O(1)–N(2)–Fe(1)#1   | 149.0(6)   |
| N(1)–C(a1)–C(m1)#2   | 125.82(19) | O(1)#5–O(1)–O(1)#3  | 90.00(2)   |
| N(1)–C(a1)–C(b1)     | 110.2(2)   | O(1)#5–O(1)–N(2)    | 68.6(4)    |
| C(m1)#2–C(a1)–C(b1)  | 124.0(2)   | O(1)#3–O(1)–N(2)    | 68.6(4)    |
| N(1)–C(a2)–C(m1)     | 126.19(19) | N(2)–O(1)–O(1)#6    | 59.0(6)    |
| N(1)–C(a2)–C(b2)     | 109.94(19) |                     |            |

<sup>a</sup>The estimated standard deviations of the least significant digits are given in parentheses.

**Table S65.** Anisotropic Displacement Parameters ( $\text{\AA}^2$ ) for  $[\text{Fe}(\text{TPP})(\text{NO})]$  at 293 K, crystal 2<sup>a</sup>

| atom  | $U_{11}$   | $U_{22}$   | $U_{33}$   | $U_{23}$   | $U_{13}$    | $U_{12}$    |
|-------|------------|------------|------------|------------|-------------|-------------|
| Fe(1) | 0.0433(3)  | 0.0433(3)  | 0.058(2)   | 0.000      | 0.000       | 0.000       |
| N(1)  | 0.0473(9)  | 0.0467(9)  | 0.0591(11) | 0.000      | 0.000       | -0.0006(7)  |
| C(m1) | 0.0542(11) | 0.0485(11) | 0.0568(12) | 0.000      | 0.000       | -0.0053(9)  |
| C(a1) | 0.0465(10) | 0.0550(11) | 0.0604(13) | 0.000      | 0.000       | 0.0007(9)   |
| C(a2) | 0.0475(10) | 0.0515(11) | 0.0624(13) | 0.000      | 0.000       | -0.0052(9)  |
| C(b1) | 0.0457(11) | 0.0615(13) | 0.0871(17) | 0.000      | 0.000       | -0.0006(9)  |
| C(b2) | 0.0486(11) | 0.0563(12) | 0.0872(17) | 0.000      | 0.000       | -0.0056(9)  |
| C(10) | 0.0512(11) | 0.0464(10) | 0.0700(14) | 0.000      | 0.000       | -0.0014(8)  |
| C(11) | 0.0982(14) | 0.0701(11) | 0.0722(12) | 0.0051(9)  | -0.0032(10) | -0.0238(10) |
| C(12) | 0.1003(16) | 0.0699(12) | 0.0982(16) | 0.0208(11) | 0.0038(12)  | -0.0216(11) |
| C(13) | 0.0610(14) | 0.0453(12) | 0.127(3)   | 0.000      | 0.000       | -0.0055(10) |
| N(2)  | 0.0427(14) | 0.0427(14) | 0.059(3)   | 0.000      | 0.000       | 0.000       |
| O(1)  | 0.10(3)    | 0.079(16)  | 0.070(5)   | 0.015(7)   | 0.021(13)   | 0.005(11)   |

<sup>a</sup>The estimated standard deviations of the least significant digits are given in parentheses. The anisotropic displacement factor exponent takes the form:  $-2 \pi [\text{h}^2 U_{11} + \dots + 2 \text{h k a}^* \text{b}^* U_{12}]$ .

**Table S66.** Hydrogen Atom Coordinates and Equivalent Isotropic Displacement Parameters ( $\text{\AA}^2$ ) for  $[\text{Fe}(\text{TPP})(\text{NO})]$  at 293 K, crystal 2<sup>a</sup>

| atom  | $x$    | $y$     | $z$    | $U(\text{eq})$ |
|-------|--------|---------|--------|----------------|
| H(b1) | 0.1219 | 0.4963  | 0.0000 | 0.078          |
| H(b2) | 0.1670 | 0.3206  | 0.0000 | 0.077          |
| H(11) | 0.3058 | 0.1685  | 0.2033 | 0.096          |
| H(12) | 0.2165 | 0.0220  | 0.2027 | 0.107          |
| H(13) | 0.1694 | -0.0498 | 0.0000 | 0.093          |

<sup>a</sup> $U(\text{eq})$  is defined as one third of the trace of the orthogonalized  $\mathbf{U}_{ij}$  tensor the estimated standard deviations of the least significant digits are given in parentheses.

## Supporting Information

Figure 1. Simulated X-ray powder diffraction spectra of [Fe(TPP)(NO)] in the  $I - 1$  and  $I4/m$  crystalline phases.

Figure 2. Plot of X-ray powder diffraction intensity vs. temperature for the 101, 121, and 231 reflections of [Fe(TPP)(NO)] ( $I4/m$ ). A plot of the first-derivative is also given.

Figure 3.

Figure 4. ORTEP diagram (50% probability ellipsoids) of [Fe(TPP)(NO)(1-MeIm)] at 33 K. Hydrogen atoms are omitted for clarity.

Figure 5. ORTEP diagram (50% probability ellipsoids) of [Fe(TPP)(NO)(1-MeIm)] at 90 K. Hydrogen atoms are omitted for clarity.

Figure 6. ORTEP diagram (50% probability ellipsoids) of [Fe(TPP)(NO)(1-MeIm)] at 100 K. Hydrogen atoms are omitted for clarity.

Figure 7. ORTEP diagram (50% probability ellipsoids) of [Fe(TPP)(NO)(1-MeIm)] at 100 K. Hydrogen atoms are omitted for clarity.

Figure 8. ORTEP diagram (50% probability ellipsoids) of [Fe(TPP)(NO)(1-MeIm)] at 100 K. Hydrogen atoms are omitted for clarity.

Figure 9. ORTEP diagram (50% probability ellipsoids) of [Fe(TPP)(NO)(1-MeIm)] at 130 K. Hydrogen atoms are omitted for clarity.

Figure 10. ORTEP diagram (50% probability ellipsoids) of [Fe(TPP)(NO)(1-MeIm)] at 180 K. Hydrogen atoms are omitted for clarity.

Figure 11. ORTEP diagram (50% probability ellipsoids) of [Fe(TPP)(NO)(1-MeIm)] at 290 K. Hydrogen atoms are omitted for clarity.

Figure 12. ORTEP diagram (50% probability ellipsoids) of [Fe(TPP)(NO)(1-MeIm)] at 293 K. Hydrogen atoms are omitted for clarity.

Figure 13. ORTEP diagram (50% probability ellipsoids) of [Fe(TPP)(NO)(1-MeIm)] at 273 K. Hydrogen atoms are omitted for clarity.

Figure 14. ORTEP diagram (50% probability ellipsoids) of [Fe(TPP)(NO)(1-MeIm)] at 293 K. Hydrogen atoms are omitted for clarity.

Figure 15. Formal diagram of the porphyrinato cores of [Fe(TPP)(NO)] at 33, 90, 100, 130, and 180 K displaying the perpendicular displacements (in units of 0.01 Å) of the core atoms from the 24-atom mean plane. Positive displacements are toward the nitrosyl-coordinated face. The location of the nitrosyl oxygen atom projection onto the porphyrin core is indicated by the small circle.

Figure 16. stereo view

Table S1. Complete Crystallographic Details for [Fe(TPP)(NO)] at 33 K, crystal 1.

Table S2. Atomic Coordinates and Equivalent Isotropic Displacement Parameters for [Fe(TPP)(NO)] at 33 K, crystal 1.

Table S3. Bond Lengths for [Fe(TPP)(NO)] at 33 K, crystal 1.

Table S4. Bond Angles for [Fe(TPP)(NO)] at 33 K, crystal 1.

Table S5. Anisotropic Isotropic Displacement Parameters for [Fe(TPP)(NO)] at 33 K, crystal 1.

Table S6. Hydrogen Coordinates and Isotropic Displacement Parameters for [Fe(TPP)(NO)] at 33 K, crystal 1.

Table S7. Complete Crystallographic Details for [Fe(TPP)(NO)] at 90 K, crystal 1.

Table S8. Atomic Coordinates and Equivalent Isotropic Displacement Parameters for [Fe(TPP)(NO)] at 90 K, crystal 1.

Table S9. Bond Lengths for [Fe(TPP)(NO)] at 90 K, crystal 1.

Table S10. Bond Angles for [Fe(TPP)(NO)] at 90 K, crystal 1.

Table S11. Anisotropic Isotropic Displacement Parameters for [Fe(TPP)(NO)] at 90 K, crystal 1.

Table S12. Hydrogen Coordinates and Isotropic Displacement Parameters for [Fe(TPP)(NO)] at 90 K, crystal 1.

Table S13. Complete Crystallographic Details for [Fe(TPP)(NO)] at 100 K, crystal 2.

Table S14. Atomic Coordinates and Equivalent Isotropic Displacement Parameters for [Fe(TPP)(NO)] at 100 K, crystal 2.

Table S15. Bond Lengths for [Fe(TPP)(NO)] at 100 K, crystal 2.

Table S16. Bond Angles for [Fe(TPP)(NO)] at 100 K, crystal 2.

Table S17. Anisotropic Isotropic Displacement Parameters for [Fe(TPP)(NO)] at 100 K, crystal 2.

Table S18. Hydrogen Coordinates and Isotropic Displacement Parameters for [Fe(TPP)(NO)] at 100 K, crystal 2.

Table S19. Complete Crystallographic Details for [Fe(TPP)(NO)] at 100 K, crystal 3.

Table S20. Atomic Coordinates and Equivalent Isotropic Displacement Parameters for [Fe(TPP)(NO)] at 100 K, crystal 3.

Table S21. Bond Lengths for [Fe(TPP)(NO)] at 100 K, crystal 3.

Table S22. Bond Angles for [Fe(TPP)(NO)] at 100 K, crystal 3.

Table S23. Anisotropic Isotropic Displacement Parameters for [Fe(TPP)(NO)] at 100 K, crystal 3.

Table S24. Hydrogen Coordinates and Isotropic Displacement Parameters for [Fe(TPP)(NO)] at 100 K, crystal 3.

Table S25. Complete Crystallographic Details for [Fe(TPP)(NO)] at 100 K, crystal 4.

Table S26. Atomic Coordinates and Equivalent Isotropic Displacement Parameters for [Fe(TPP)(NO)] at 100 K, crystal 4.

Table S27. Bond Lengths for [Fe(TPP)(NO)] at 100 K, crystal 4.

Table S28. Bond Angles for [Fe(TPP)(NO)] at 100 K, crystal 4.

Table S29. Anisotropic Isotropic Displacement Parameters for [Fe(TPP)(NO)] at 100 K, crystal 4.

Table S30. Hydrogen Coordinates and Isotropic Displacement Parameters for [Fe(TPP)(NO)] at 100 K, crystal 4.

Table S31. Complete Crystallographic Details for [Fe(TPP)(NO)] at 130 K, crystal 4.

Table S32. Atomic Coordinates and Equivalent Isotropic Displacement Parameters for [Fe(TPP)(NO)] at 130 K, crystal 4.

Table S33. Bond Lengths for [Fe(TPP)(NO)] at 130 K, crystal 4.

Table S34. Bond Angles for [Fe(TPP)(NO)] at 130 K, crystal 4.

Table S35. Anisotropic Isotropic Displacement Parameters for [Fe(TPP)(NO)] at 130 K, crystal 4.

Table S36. Hydrogen Coordinates and Isotropic Displacement Parameters for [Fe(TPP)(NO)] at 130 K, crystal 4.

Table S37. Complete Crystallographic Details for [Fe(TPP)(NO)] at 180 K, crystal 1.

Table S38. Atomic Coordinates and Equivalent Isotropic Displacement Parameters for [Fe(TPP)(NO)] at 180 K, crystal 1.

Table S39. Bond Lengths for [Fe(TPP)(NO)] at 180 K, crystal 1.

Table S40. Bond Angles for [Fe(TPP)(NO)] at 180 K, crystal 1.

Table S41. Anisotropic Isotropic Displacement Parameters for [Fe(TPP)(NO)] at 180 K, crystal 1.

Table S42. Hydrogen Coordinates and Isotropic Displacement Parameters for [Fe(TPP)(NO)] at 180 K, crystal 1.

Table S43. Complete Crystallographic Details for [Fe(TPP)(NO)] at 273 K, crystal 4.

Table S44. Atomic Coordinates and Equivalent Isotropic Displacement Parameters for [Fe(TPP)(NO)] at 273 K, crystal 4.

Table S45. Bond Lengths for [Fe(TPP)(NO)] at 273 K, crystal 4.

Table S46. Bond Angles for [Fe(TPP)(NO)] at 273 K, crystal 4.

Table S47. Anisotropic Isotropic Displacement Parameters for [Fe(TPP)(NO)] at 273 K, crystal 4.

Table S48. Hydrogen Coordinates and Isotropic Displacement Parameters for [Fe(TPP)(NO)] at 273 K, crystal 4.

Table S49. Complete Crystallographic Details for [Fe(TPP)(NO)] at 290 K, crystal 2.

Table S50. Atomic Coordinates and Equivalent Isotropic Displacement Parameters for [Fe(TPP)(NO)] at 290 K, crystal 2.

Table S51. Bond Lengths for [Fe(TPP)(NO)] at 290 K, crystal 2.

Table S52. Bond Angles for [Fe(TPP)(NO)] at 290 K, crystal 2.

Table S53. Anisotropic Isotropic Displacement Parameters for [Fe(TPP)(NO)] at 290 K, crystal 2.

Table S54. Hydrogen Coordinates and Isotropic Displacement Parameters for [Fe(TPP)(NO)] at 290 K, crystal 2.

Table S55. Complete Crystallographic Details for [Fe(TPP)(NO)] at 293 K, crystal 1.

Table S56. Atomic Coordinates and Equivalent Isotropic Displacement Parameters for [Fe(TPP)(NO)] at 293 K, crystal 1.

Table S57. Bond Lengths for [Fe(TPP)(NO)] at 293 K, crystal 1.

Table S58. Bond Angles for [Fe(TPP)(NO)] at 293 K, crystal 1.

Table S59. Anisotropic Isotropic Displacement Parameters for [Fe(TPP)(NO)] at 293 K, crystal 1.

Table S60. Hydrogen Coordinates and Isotropic Displacement Parameters for [Fe(TPP)(NO)] at 293 K, crystal 1.

Table S61. Complete Crystallographic Details for [Fe(TPP)(NO)] at 293 K, crystal 2.

Table S62. Atomic Coordinates and Equivalent Isotropic Displacement Parameters for [Fe(TPP)(NO)] at 293 K, crystal 2.

Table S63. Bond Lengths for [Fe(TPP)(NO)] at 293 K, crystal 2.

Table S64. Bond Angles for [Fe(TPP)(NO)] at 293 K, crystal 2.

Table S65. Anisotropic Isotropic Displacement Parameters for [Fe(TPP)(NO)] at 293 K, crystal 2.

Table S66. Hydrogen Coordinates and Isotropic Displacement Parameters for [Fe(TPP)(NO)] at 293 K, crystal 2.
